# Supplementary material for: Isoquinoline Alkaloids as Protein Tyrosine Phosphatase Inhibitors from a Deep-Sea-Derived Fungus Aspergillus puniceus
Source: MDPI journal article supplement (doi:10.3390/md20010078), 2022-01-17

## Supplementary Information

### Isoquinoline alkaloids as protein tyrosine inhibitors from a deep-sea-derived fungus *Aspergillus puniceus*

Cheng-Mei Liu,<sup>a,b</sup> Fei-Hua Yao,<sup>a,b</sup> Xin-Hua Lu,<sup>d</sup> Xue-Xia Zhang,<sup>d</sup> Lian-Xiang Luo,<sup>e</sup> Xiao Liang,<sup>a</sup> Shu-Hua Qi<sup>a, c, \*</sup>

<sup>a</sup> CAS Key Laboratory of Tropical Marine Bio-resources and Ecology/Guangdong Key Laboratory of Marine Materia Medica/Innovation Academy of South China Sea Ecology and Environmental Engineering, South China Sea Institute of Oceanology, Chinese Academy of Sciences, Guangzhou 510301, Guangdong, China

<sup>b</sup> University of Chinese Academy of Sciences, Beijing, 100049, China

<sup>c</sup> Southern Marine Science and Engineering Guangdong Laboratory (Guangzhou), 1119 Haibin Road, Nansha District, Guangzhou 511458, China

<sup>d</sup> New Drug Research & Development Co., Ltd, North China Pharmaceutical Group Corporation, Shijiazhuang, Hebei 050015, China

<sup>e</sup> The Marine Biomedical Research Institute, Guangdong Medical University, Zhanjiang, Guangdong, 524023, China

## Contents

**Figure S1.** <sup>1</sup>H NMR spectrum of **1** in DMSO-*d*<sub>6</sub>.

**Figure S2.** <sup>13</sup>C NMR spectrum of **1** in DMSO-*d*<sub>6</sub>.

**Figure S3.** HMBC spectrum of **1** in DMSO-*d*<sub>6</sub>.

**Figure S4.** Partial HMBC spectrum of **1** in DMSO-*d*<sub>6</sub>.

**Figure S5.** HRESIMS spectrum of **1**.

**Figure S6.** UV spectrum of **1**.

**Figure S7.** <sup>1</sup>H NMR spectrum of **2** in methanol-*d*<sub>4</sub>.

**Figure S8.** <sup>13</sup>C NMR spectrum of **2** in methanol-*d*<sub>4</sub>.

**Figure S9.** HMBC spectrum of **2** in methanol-*d*<sub>4</sub>.

**Figure S10.** Partial HMBC spectrum of **2** in methanol-*d*<sub>4</sub>.

**Figure S11.** HRESIMS spectrum of **2**.  
**Figure S12.** UV spectrum of **2**.  
**Figure S13.**  $^1\text{H}$  NMR spectrum of **3** in methanol- $d_4$ .  
**Figure S14.**  $^{13}\text{C}$  NMR spectrum of **3** in methanol- $d_4$ .  
**Figure S15.** HSQC spectrum of **3** in methanol- $d_4$ .  
**Figure S16.** HMBC spectrum of **3** in methanol- $d_4$ .  
**Figure S17.** Partial HMBC spectrum of **3** in methanol- $d_4$ .  
**Figure S18.** Partial HMBC spectrum of **3** in methanol- $d_4$ .  
**Figure S19.** HRESIMS spectrum of **3**.  
**Figure S20.** IR spectrum of **3**.  
**Figure S21.** UV spectrum of **3**.  
**Figure S22.**  $^1\text{H}$  NMR spectrum of **4** in methanol- $d_4$ .  
**Figure S23.**  $^{13}\text{C}$  NMR spectrum of **4** in methanol- $d_4$ .  
**Figure S24.** HSQC spectrum of **4** in methanol- $d_4$ .  
**Figure S25.** Partial HSQC spectrum of **4** in methanol- $d_4$ .  
**Figure S26.** HMBC spectrum of **4** in methanol- $d_4$ .  
**Figure S27.** Partial HMBC spectrum of **4** in methanol- $d_4$ .  
**Figure S28.** Partial HMBC spectrum of **4** in methanol- $d_4$ .  
**Figure S29.** HRESIMS spectrum of **4**.  
**Figure S30.** IR spectrum of **4**.  
**Figure S31.** UV spectrum of **4**.  
**Figure S32.**  $^1\text{H}$  NMR spectrum of **5** in methanol- $d_4$ .  
**Figure S33.**  $^{13}\text{C}$  NMR spectrum of **5** in methanol- $d_4$ .  
**Figure S34.** HSQC spectrum of **5** in methanol- $d_4$ .  
**Figure S35.** HMBC spectrum of **5** in methanol- $d_4$ .  
**Figure S36.** Partial HMBC spectrum of **5** in methanol- $d_4$ .  
**Figure S37.** Partial HMBC spectrum of **5** in methanol- $d_4$ .  
**Figure S38.** HRESIMS spectrum of **5**.  
**Figure S39.** IR spectrum of **5**.  
**Figure S40.** UV spectrum of **5**.  
**Figure S41.**  $^1\text{H}$  NMR spectrum of **6** in methanol- $d_4$ .  
**Figure S42.**  $^{13}\text{C}$  NMR spectrum of **6** in methanol- $d_4$ .  
**Figure S43.** HSQC spectrum of **6** in methanol- $d_4$ .  
**Figure S44.** HMBC spectrum of **6** in methanol- $d_4$ .  
**Figure S45.** HRESIMS spectrum of **6**.  
**Figure S46.** IR spectrum of **6**.  
**Figure S47.** UV spectrum of **6**.  
**Figure S48.** Chirality analysis of compound **6**.  
**Figure S49.**  $^1\text{H}$  NMR spectrum of **7** in methanol- $d_4$ .  
**Figure S50.**  $^{13}\text{C}$  NMR spectrum of **7** in methanol- $d_4$ .  
**Figure S51.** HSQC spectrum of **7** in methanol- $d_4$ .  
**Figure S52.** HMBC spectrum of **7** in methanol- $d_4$ .  
**Figure S53.** Partial HMBC spectrum of **7** in methanol- $d_4$ .  
**Figure S54.** Partial HMBC spectrum of **7** in methanol- $d_4$ .

**Figure S55.** HRESIMS spectrum of **7**.  
**Figure S56.** IR spectrum of **7**.  
**Figure S57.** UV spectrum of **7**.  
**Figure S58.**  $^1\text{H}$  NMR spectrum of **8** in  $\text{DMSO-}d_6$ .  
**Figure S59.**  $^{13}\text{C}$  and DEPT135 NMR spectra of **8** in  $\text{DMSO-}d_6$ .  
**Figure S60.** HSQC spectrum of **8** in  $\text{DMSO-}d_6$ .  
**Figure S61.** HMBC spectrum of **8** in  $\text{DMSO-}d_6$ .  
**Figure S62.** Partial HMBC spectrum of **8** in  $\text{DMSO-}d_6$ .  
**Figure S63.** Partial HMBC spectrum of **8** in  $\text{DMSO-}d_6$ .  
**Figure S64.** Partial HMBC spectrum of **8** in  $\text{DMSO-}d_6$ .  
**Figure S65.** HRESIMS spectrum of **8**.  
**Figure S66.** IR spectrum of **8**.  
**Figure S67.** UV spectrum of **8**.  
**Figure S68.**  $^1\text{H}$  NMR spectrum of **9** in  $\text{DMSO-}d_6$ .  
**Figure S69.**  $^{13}\text{C}$  and DEPT135 NMR spectra of **9** in  $\text{DMSO-}d_6$ .  
**Figure S70.** HSQC spectrum of **9** in  $\text{DMSO-}d_6$ .  
**Figure S71.** HMBC spectrum of **9** in  $\text{DMSO-}d_6$ .  
**Figure S72.** Partial HMBC spectrum of **9** in  $\text{DMSO-}d_6$ .  
**Figure S73.** Partial HMBC spectrum of **9** in  $\text{DMSO-}d_6$ .  
**Figure S74.** HRESIMS spectrum of **9**.  
**Figure S75.** IR spectrum of **9**.  
**Figure S76.** UV spectrum of **9**.  
**Figure S77.** CD spectrum of **9** in methanol.  
**Figure S78.**  $^1\text{H}$  NMR spectrum of **10** in methanol- $d_4$ .  
**Figure S79.**  $^{13}\text{C}$  NMR spectrum of **10** in methanol- $d_4$ .  
**Figure S80.** HSQC spectrum of **10** in methanol- $d_4$ .  
**Figure S81.** HMBC spectrum of **10** in methanol- $d_4$ .  
**Figure S82.** Partial HMBC spectrum of **10** in methanol- $d_4$ .  
**Figure S83.** Partial HMBC spectrum of **10** in methanol- $d_4$ .  
**Figure S84.** HRESIMS spectrum of **10**.  
**Figure S85.** IR spectrum of **10**.  
**Figure S86.** UV spectrum of **10**.  
**Figure S87.**  $^1\text{H}$  NMR spectrum of **11** in methanol- $d_4$ .  
**Figure S88.**  $^{13}\text{C}$  NMR spectrum of **11** in methanol- $d_4$ .  
**Figure S89.** HSQC spectrum of **11** in methanol- $d_4$ .  
**Figure S90.** HMBC spectrum of **11** in methanol- $d_4$ .  
**Figure S91.** Partial HMBC spectrum of **11** in methanol- $d_4$ .  
**Figure S92.** Partial HMBC spectrum of **11** in methanol- $d_4$ .  
**Figure S93.** HRESIMS spectrum of **11**.  
**Figure S94.** IR spectrum of **11**.  
**Figure S95.** UV spectrum of **11**.  
**Figure S96.** CD spectrum of **11** in methanol.  
**Figure S97.**  $^1\text{H}$  NMR spectrum of **12** in methanol- $d_4$ .  
**Figure S98.**  $^{13}\text{C}$  NMR spectrum of **12** in methanol- $d_4$ .

**Figure S99.** HSQC spectrum of **12** in methanol-*d*<sub>4</sub>.  
**Figure S100.** HMBC spectrum of **12** in methanol-*d*<sub>4</sub>.  
**Figure S101.** Partial HMBC spectrum of **12** in methanol-*d*<sub>4</sub>.  
**Figure S102.** HRESIMS spectrum of **12**.  
**Figure S103.** IR spectrum of **12**.  
**Figure S104.** UV spectrum of **12**.  
**Figure S105.** <sup>1</sup>H NMR spectrum of **13** in methanol-*d*<sub>4</sub>.  
**Figure S106.** <sup>13</sup>C NMR spectrum of **13** in methanol-*d*<sub>4</sub>.  
**Figure S107.** HSQC spectrum of **13** in DMSO-*d*<sub>6</sub>.  
**Figure S108.** HMBC spectrum of **13** in methanol-*d*<sub>4</sub>.  
**Figure S109.** Partial HMBC spectrum of **13** in methanol-*d*<sub>4</sub>.  
**Figure S110.** Partial HMBC spectrum of **13** in methanol-*d*<sub>4</sub>.  
**Figure S111.** HRESIMS spectrum of **13**.  
**Figure S112.** IR spectrum of **13**.  
**Figure S113.** UV spectrum of **13**.  
**Figure S114.** <sup>1</sup>H NMR spectrum of **14** in methanol-*d*<sub>4</sub>.  
**Figure S115.** <sup>13</sup>C NMR spectrum of **14** in methanol-*d*<sub>4</sub>.  
**Figure S116.** HSQC spectrum of **14** in methanol-*d*<sub>4</sub>.  
**Figure S117.** HMBC spectrum of **14** in methanol-*d*<sub>4</sub>.  
**Figure S118.** Partial HMBC spectrum of **14** in methanol-*d*<sub>4</sub>.  
**Figure S119.** Partial HMBC spectrum of **14** in methanol-*d*<sub>4</sub>.  
**Figure S120.** Partial HMBC spectrum of **14** in methanol-*d*<sub>4</sub>.  
**Figure S121.** COSY spectrum of **14** in methanol-*d*<sub>4</sub>.  
**Figure S122.** HRESIMS spectrum of **14**.  
**Figure S123.** IR spectrum of **14**.  
**Figure S124.** UV spectrum of **14**.  
**Figure S125.** Chirality analysis of compound **14** by CHIRALPAK IA  
**Figure S126.** Chirality analysis of compound **14** by CHIRALPAK IB

#### **Computational Methods**

**Table S1.** Stable conformers of compound **9** used for ECD calculations.  
**Table S2.** Important thermodynamic parameters (a.u.) of **9** at B3LYP/6-311G (d,p) level in the gas phase.  
**Table S3.** Relative thermal energies ( $\Delta E$ ), relative free energies ( $\Delta G$ ), and equilibrium populations (P) of low-energy conformers of structures (16*R*)-**9** in methanol.  
**Table S4.** Crystal data and structure refinement for compound **6**  
**Table S5.** Crystal data and structure refinement for compound **12**



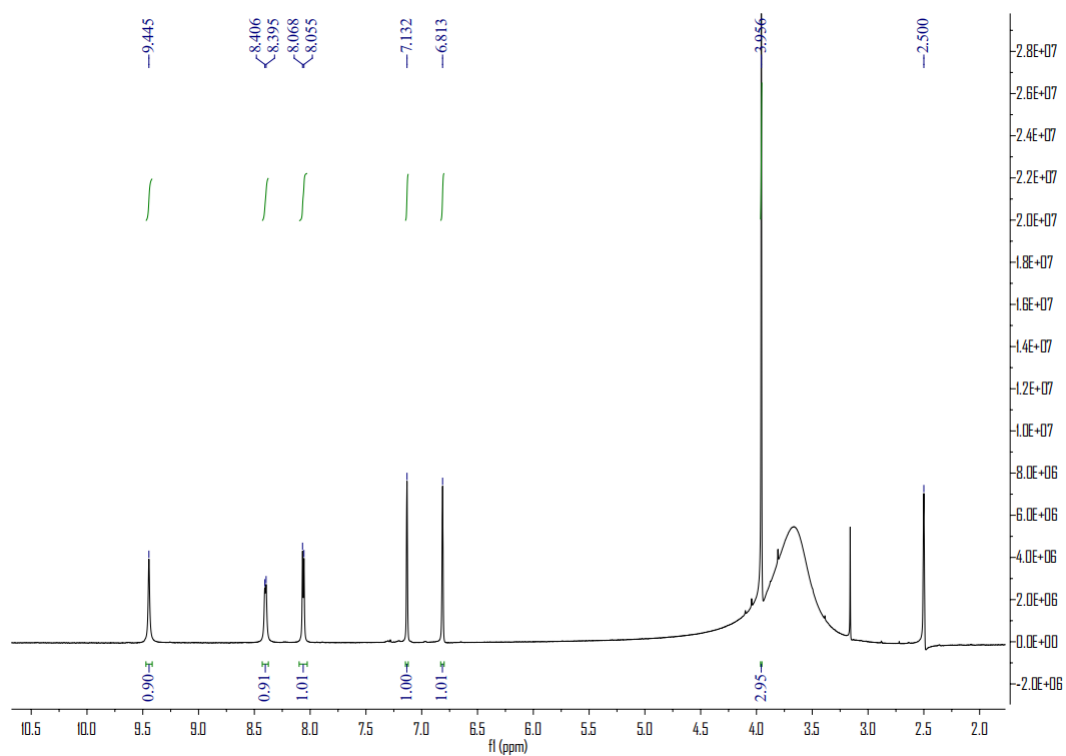

**Figure S1.** <sup>1</sup>H NMR spectrum of **1** in DMSO-*d*<sub>6</sub>

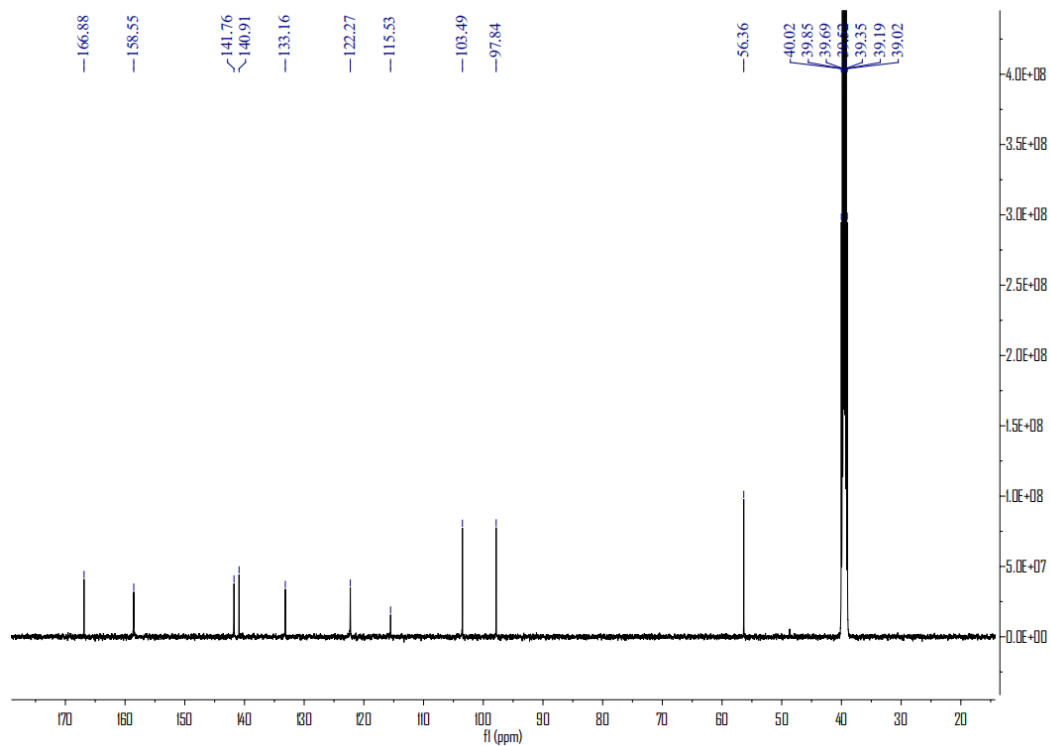

**Figure S2.** <sup>13</sup>C NMR spectrum of **1** in DMSO-*d*<sub>6</sub>

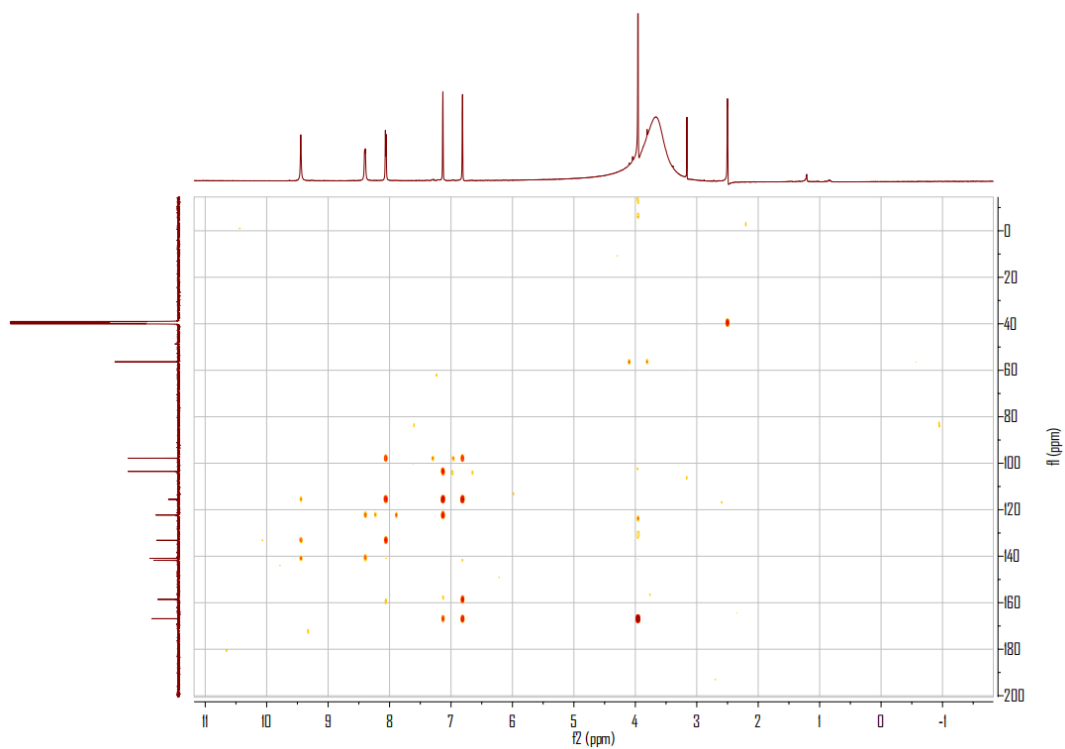

**Figure S3.** HMBC spectrum of **1** in DMSO- $d_6$

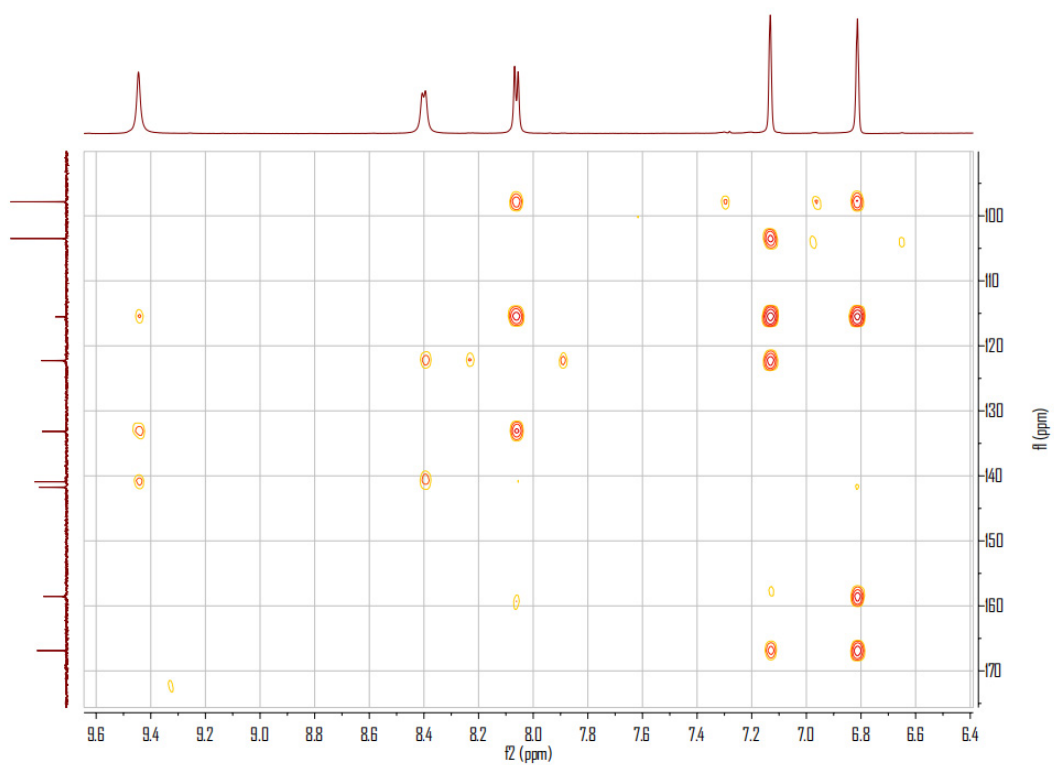

**Figure S4.** Partial HMBC spectrum of **1** in DMSO- $d_6$

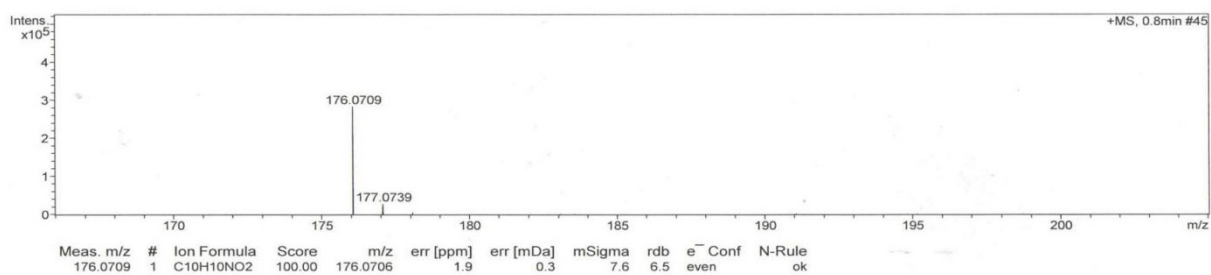

**Figure S5.** HRESIMS spectrum of **1**

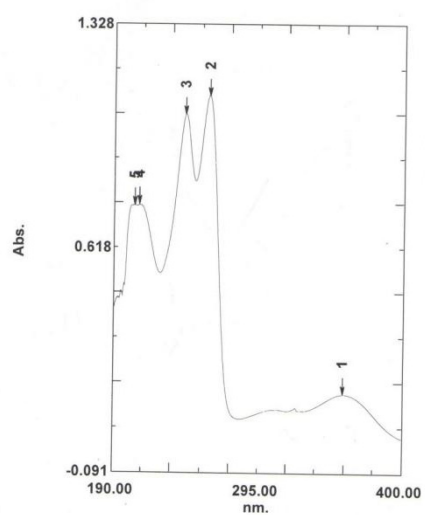

**Figure S6.** UV spectrum of **1**

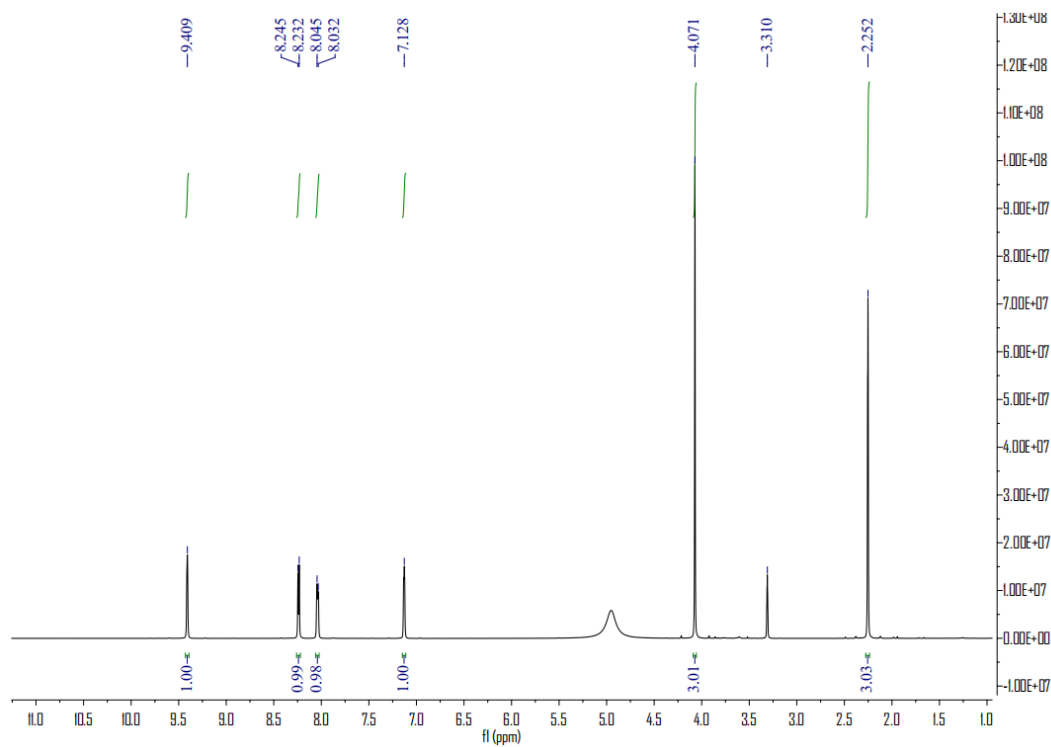

**Figure S7.** <sup>1</sup>H NMR spectrum of **2** in methanol-*d*<sub>4</sub>

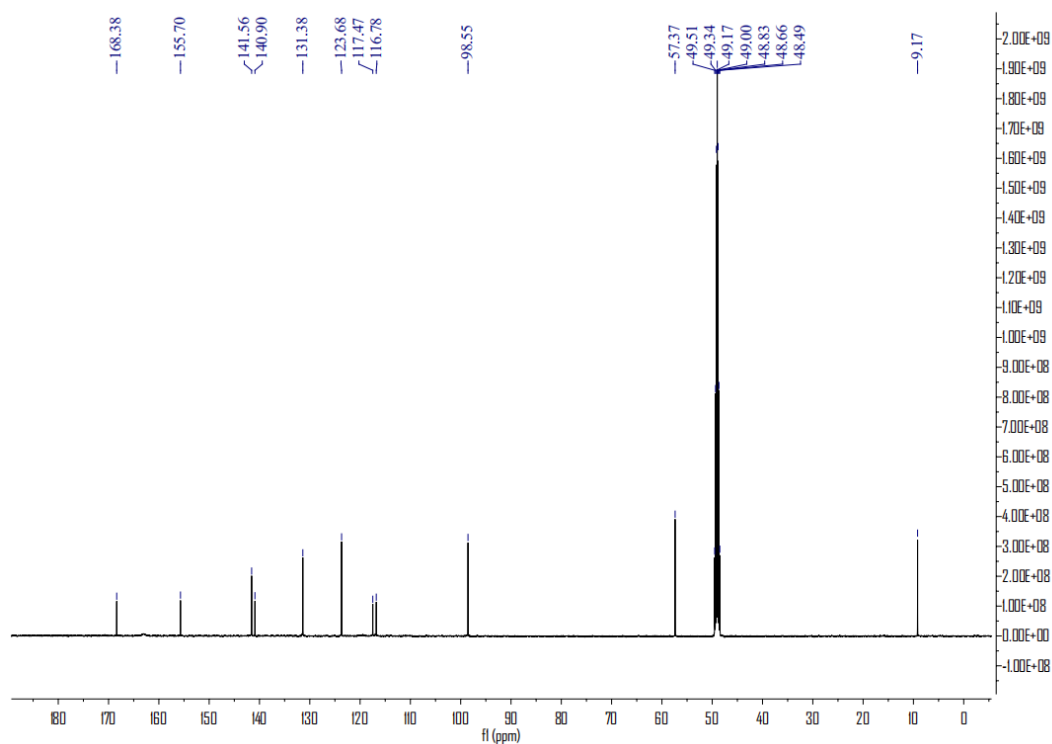

**Figure S8.** <sup>13</sup>C NMR spectrum of **2** in methanol-*d*<sub>4</sub>

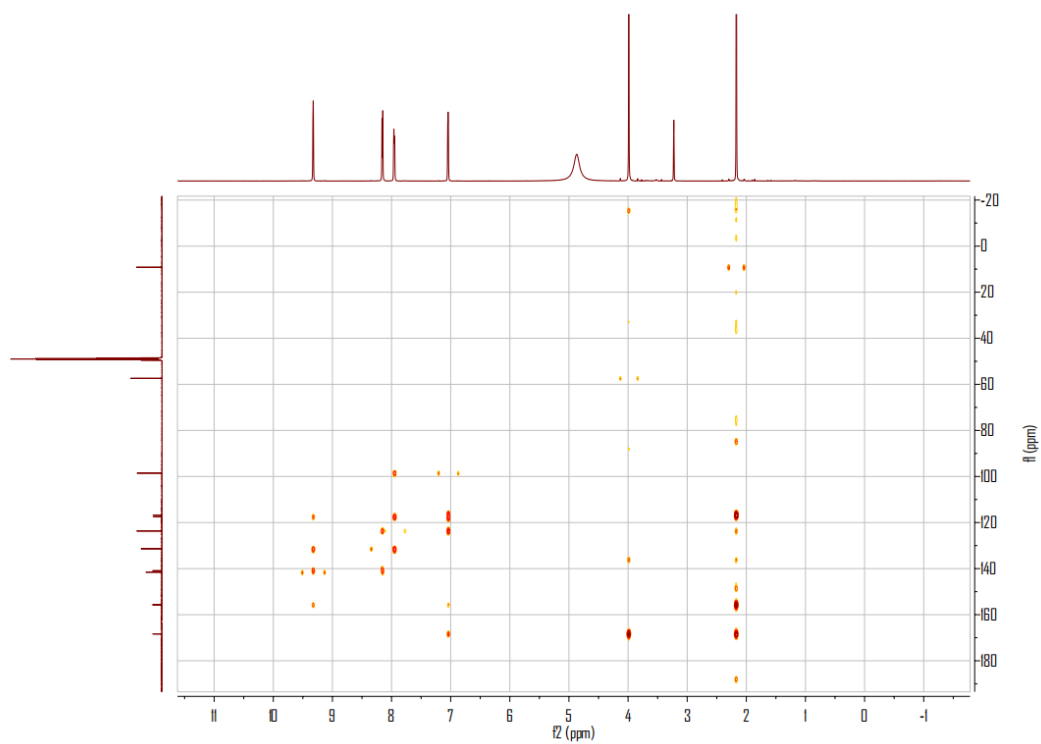

**Figure S9.** HMBC spectrum of **2** in methanol-*d*<sub>4</sub>

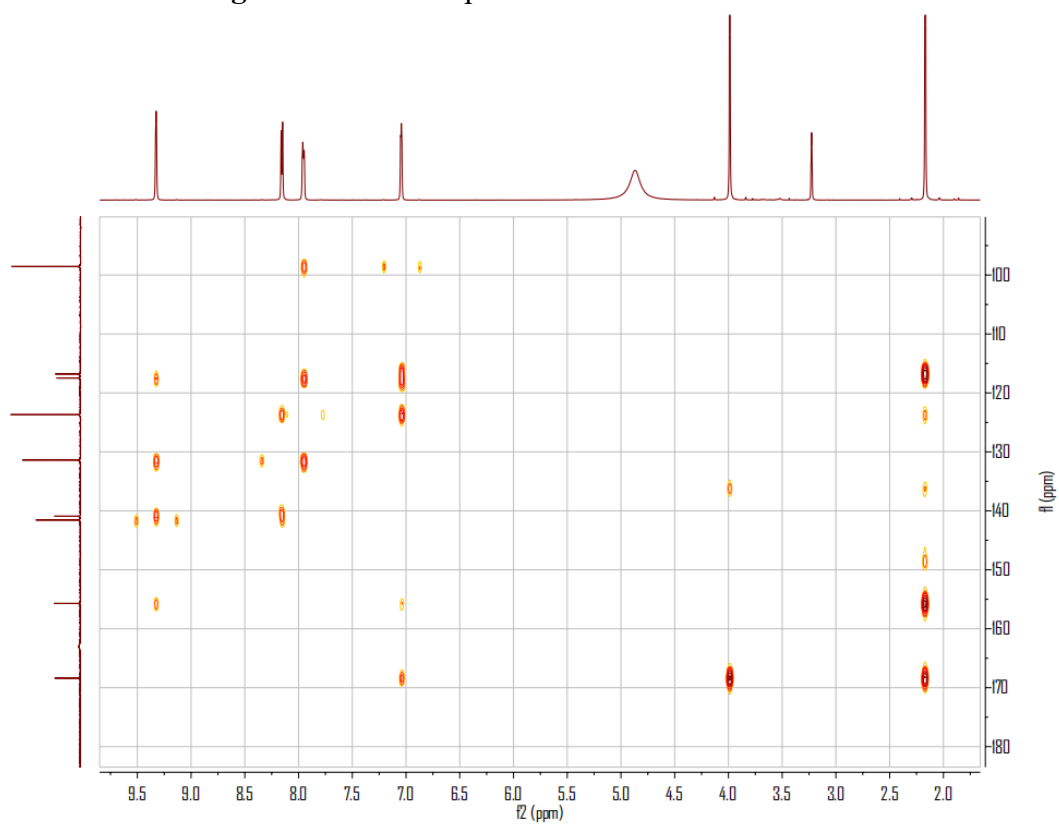

**Figure S10.** Partial HMBC spectrum of **2** in methanol-*d*<sub>4</sub>

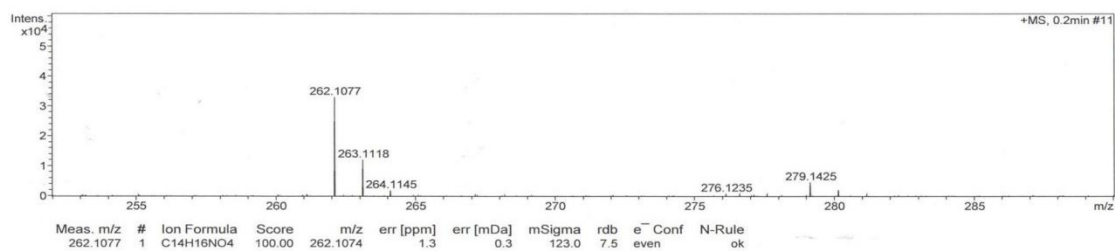

**Figure S11.** HRESIMS spectrum of **2**

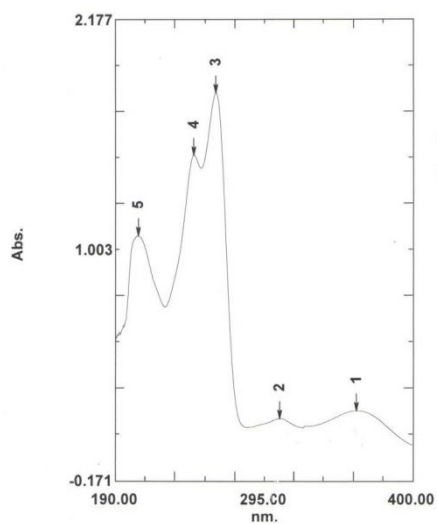

**Figure S12.** UV spectrum of **2**.

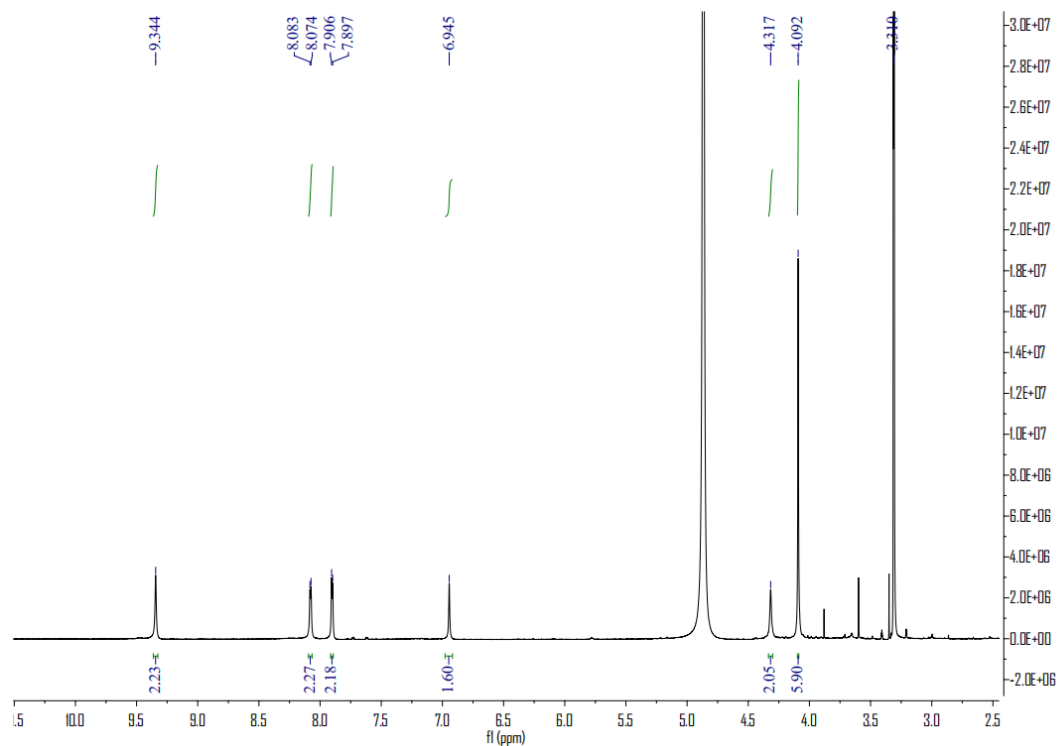

**Figure S13.** <sup>1</sup>H NMR spectrum of **3** in methanol-*d*<sub>4</sub>

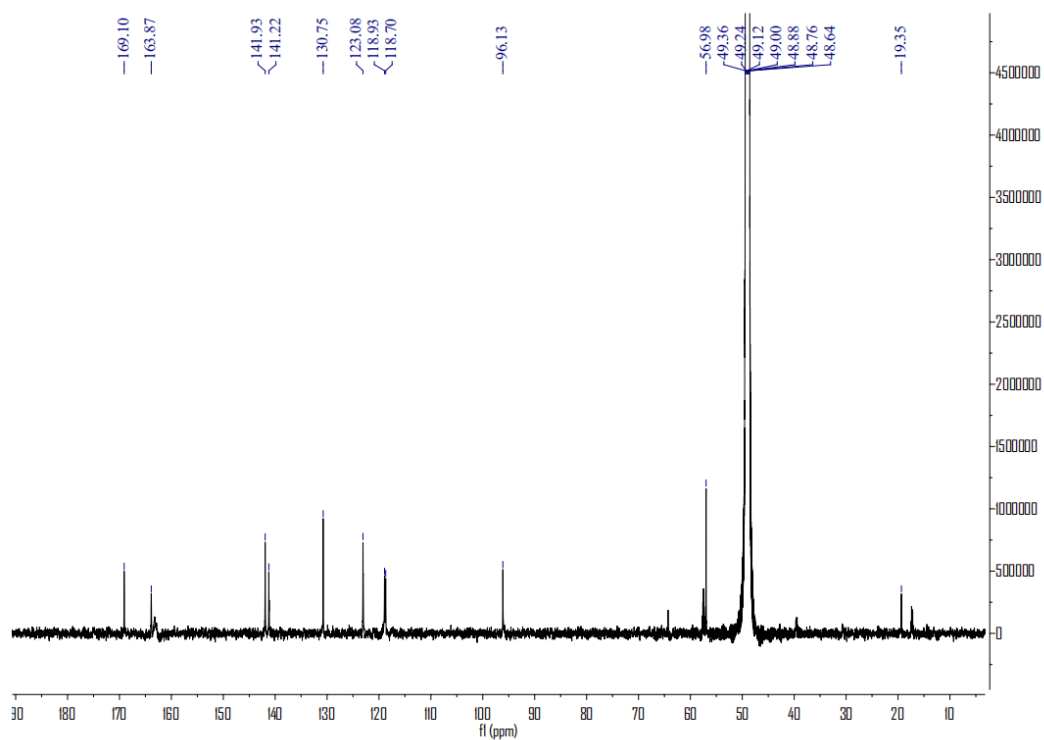

**Figure S14.** <sup>13</sup>C NMR spectrum of **3** in methanol-*d*<sub>4</sub>

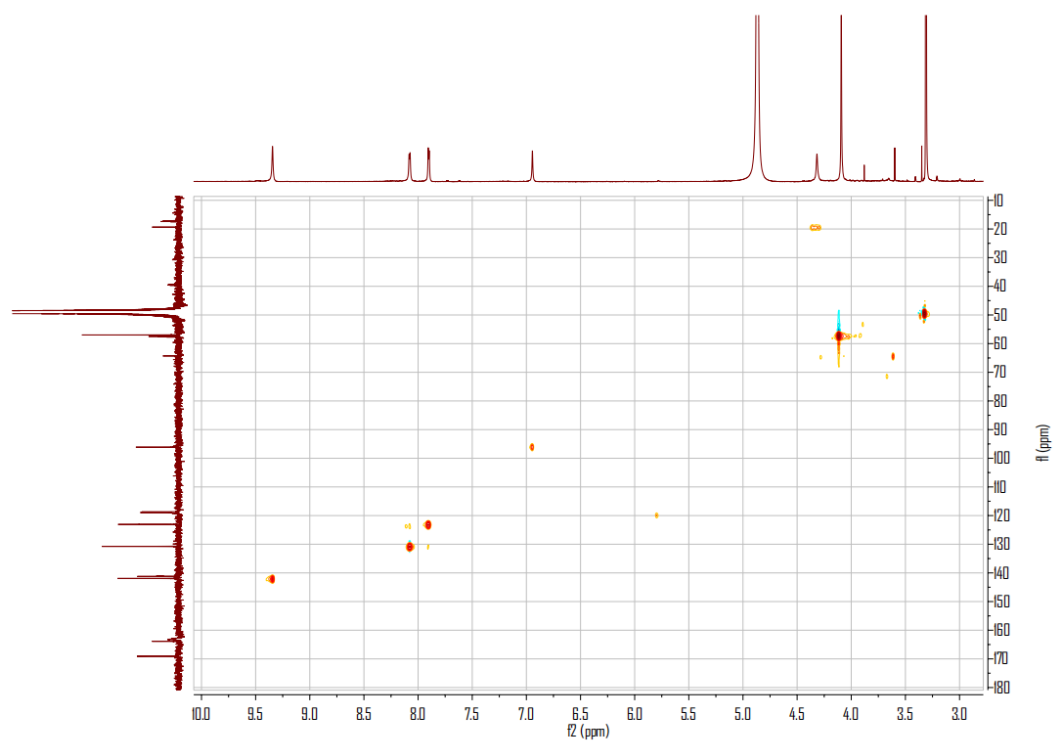

**Figure S15.** HSQC spectrum of **3** in methanol-*d*<sub>4</sub>

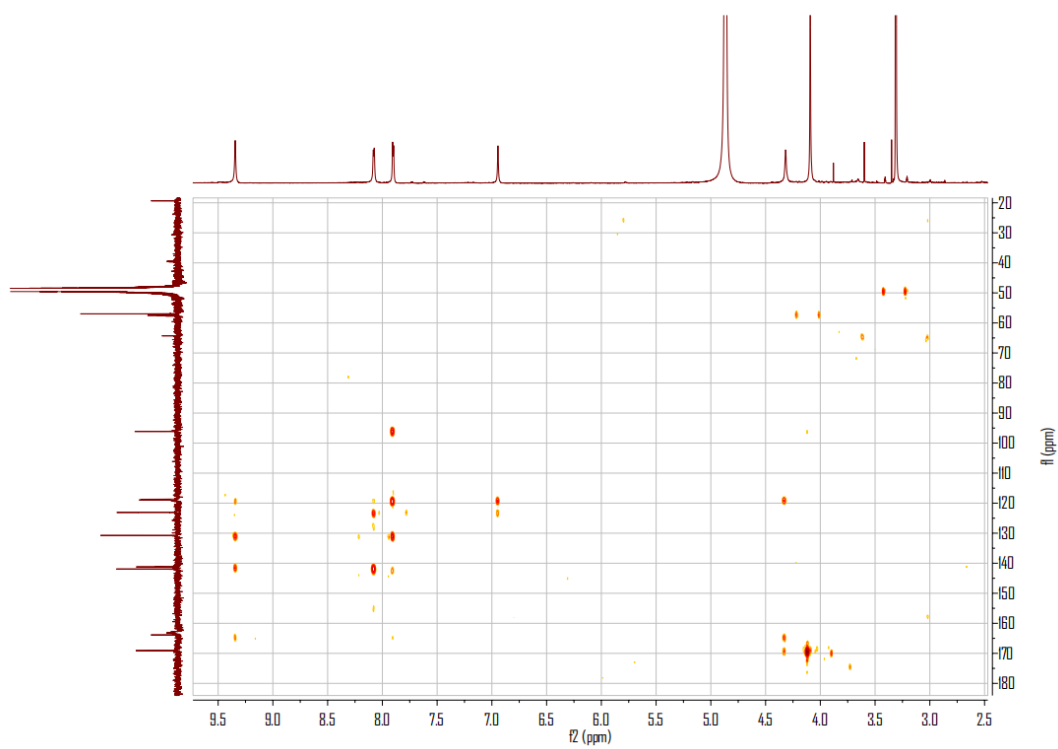

**Figure S16.** HMBC spectrum of **3** in methanol-*d*<sub>4</sub>



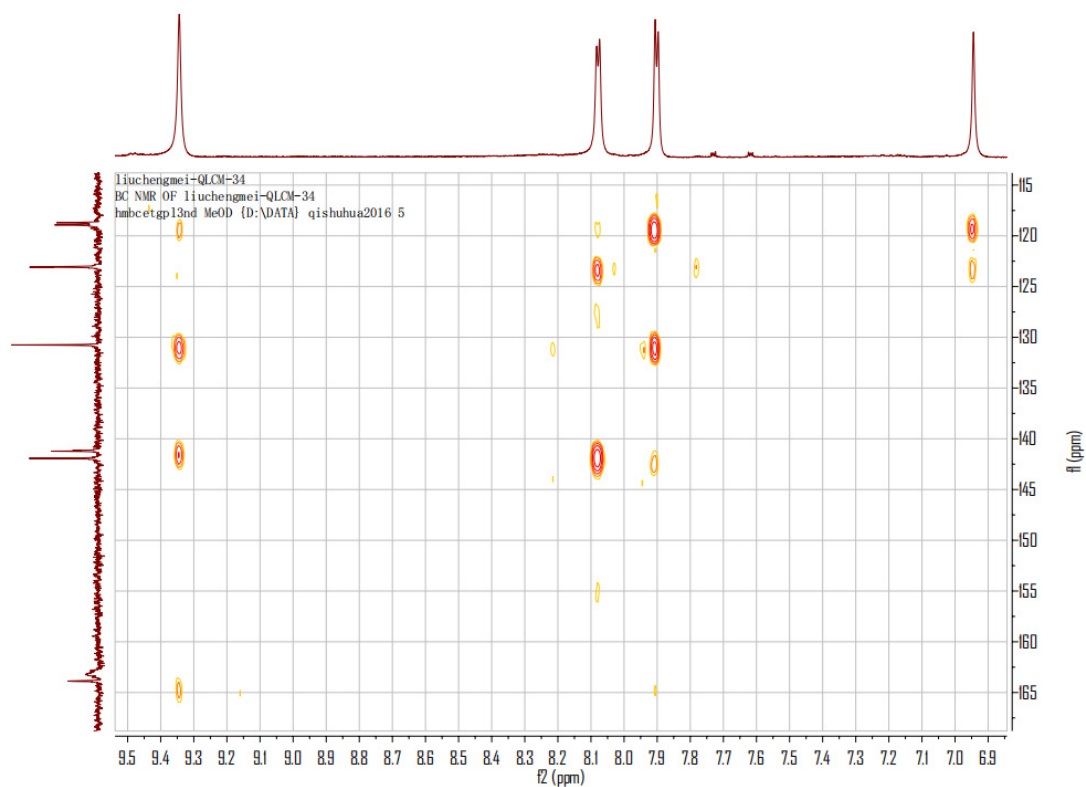

**Figure S17.** Partial HMBC spectrum of **3** in methanol- $d_4$

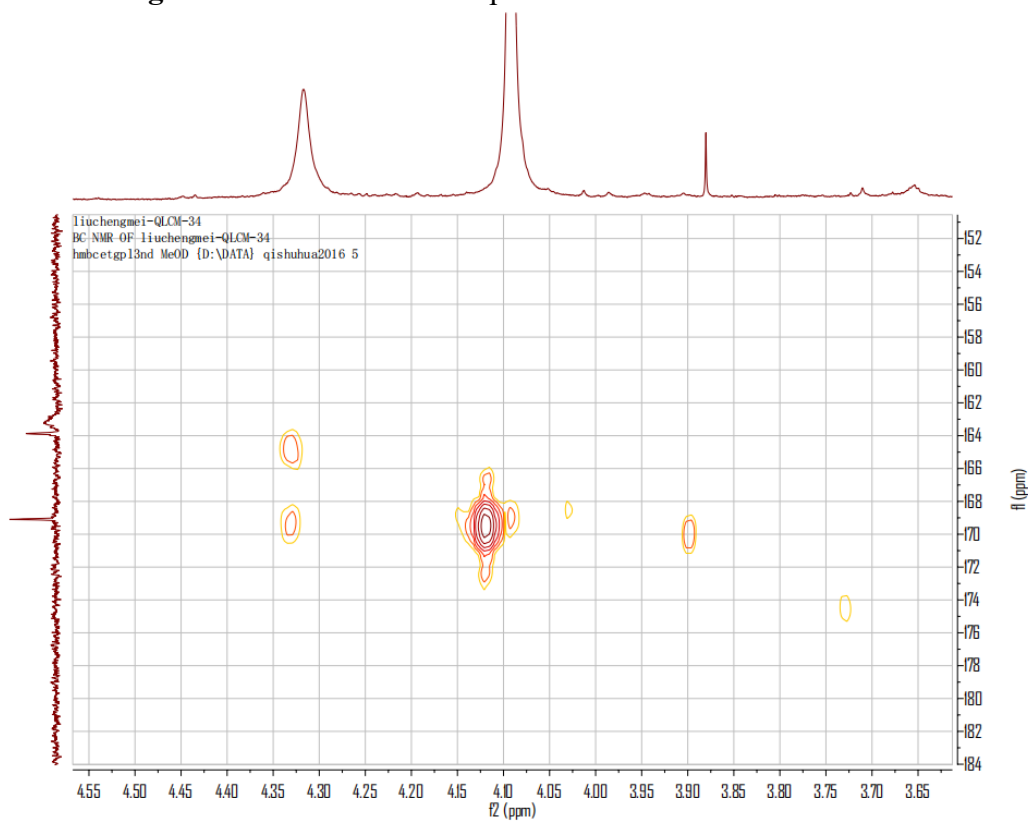

**Figure S18.** Partial HMBC spectrum of **3** in methanol- $d_4$

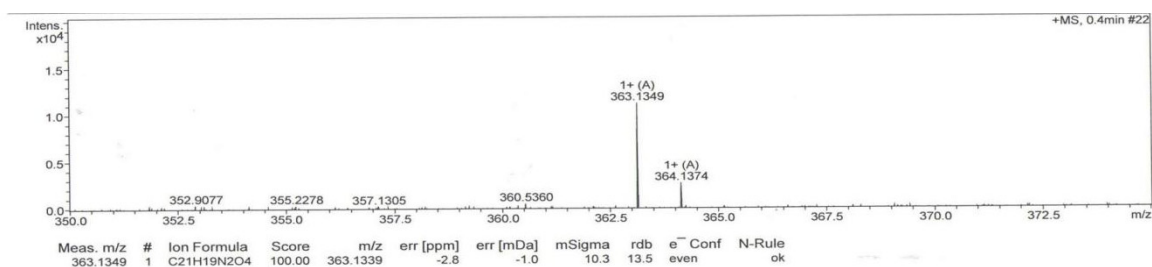

Figure S19. HRESIMS spectrum of 3.

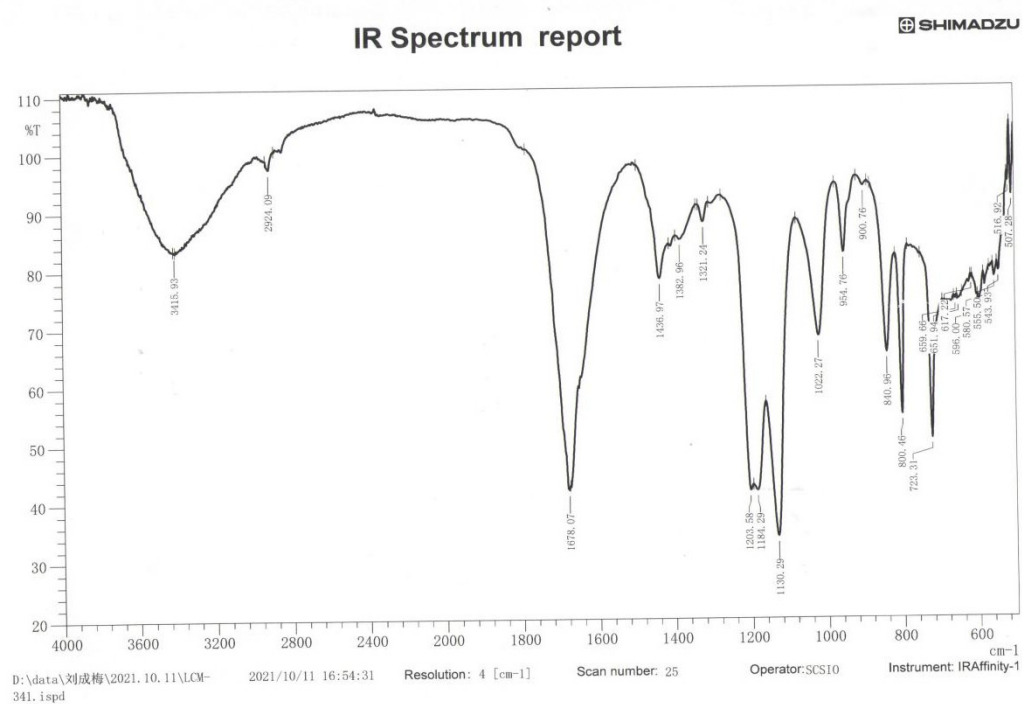

Figure S20. IR spectrum of 3

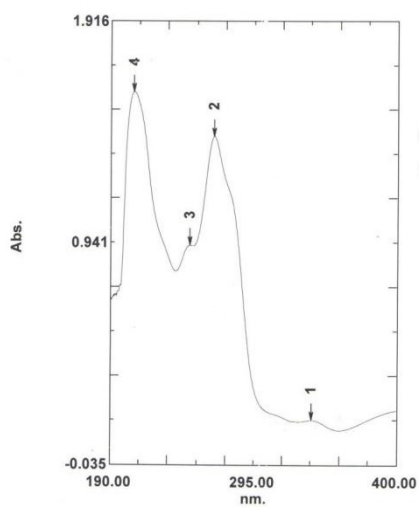

Figure S21. UV spectrum of 3

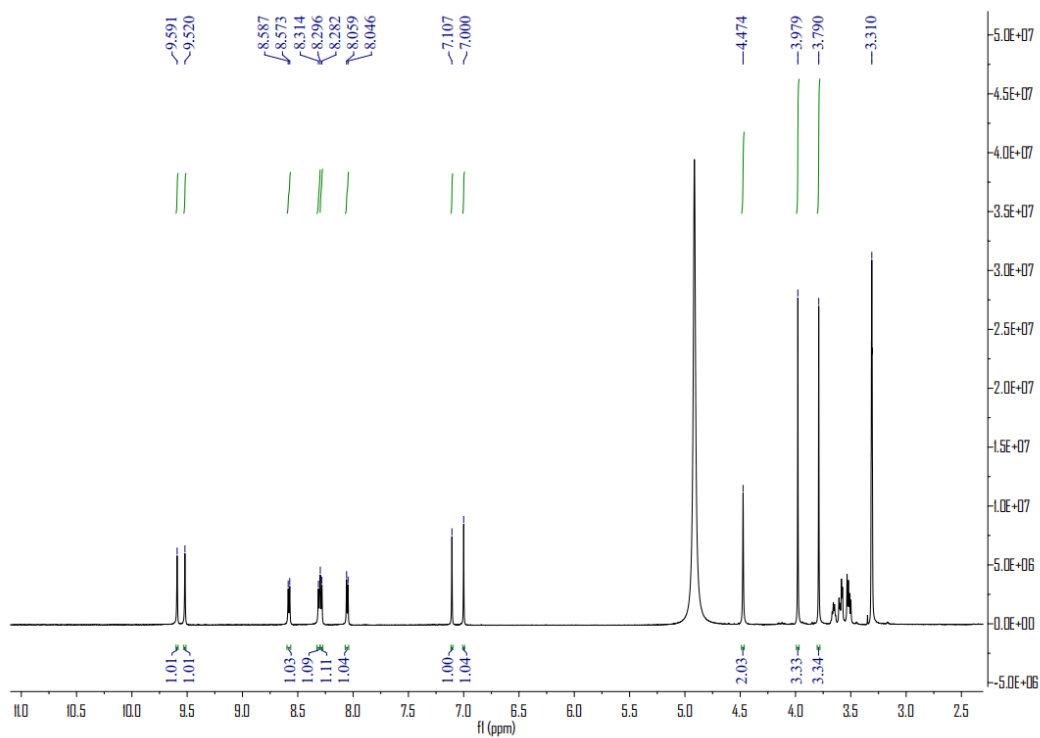

**Figure S22.** <sup>1</sup>H NMR spectrum of **4** in methanol-*d*<sub>4</sub>

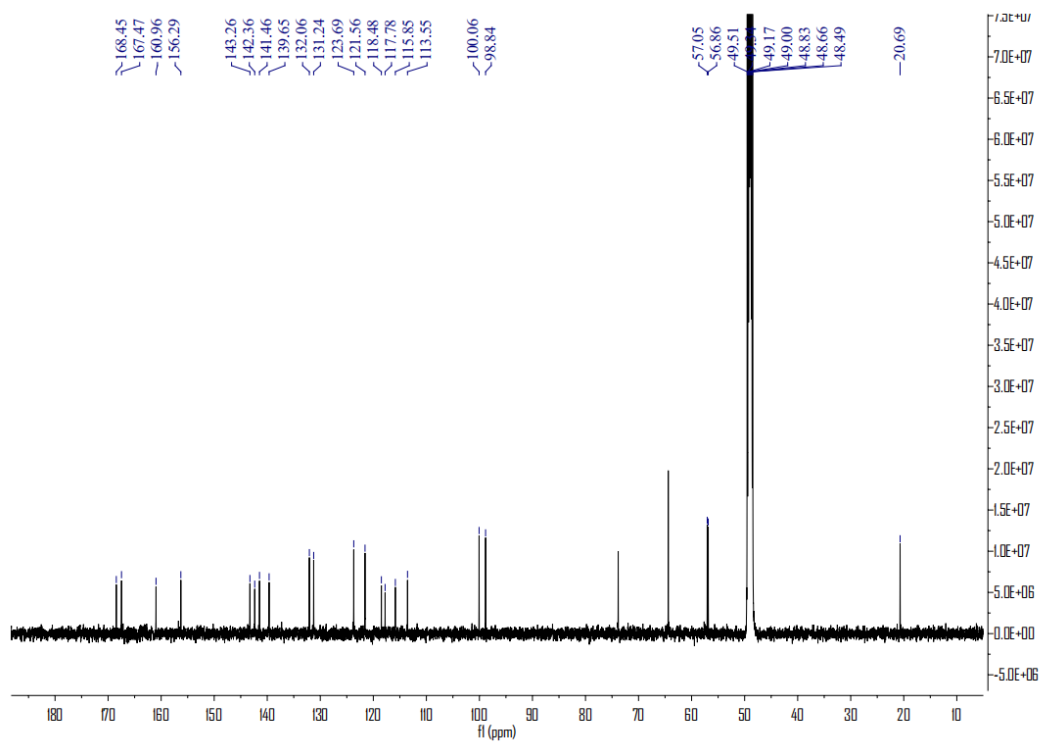

**Figure S23.** <sup>13</sup>C NMR spectrum of **4** in methanol-*d*<sub>4</sub>

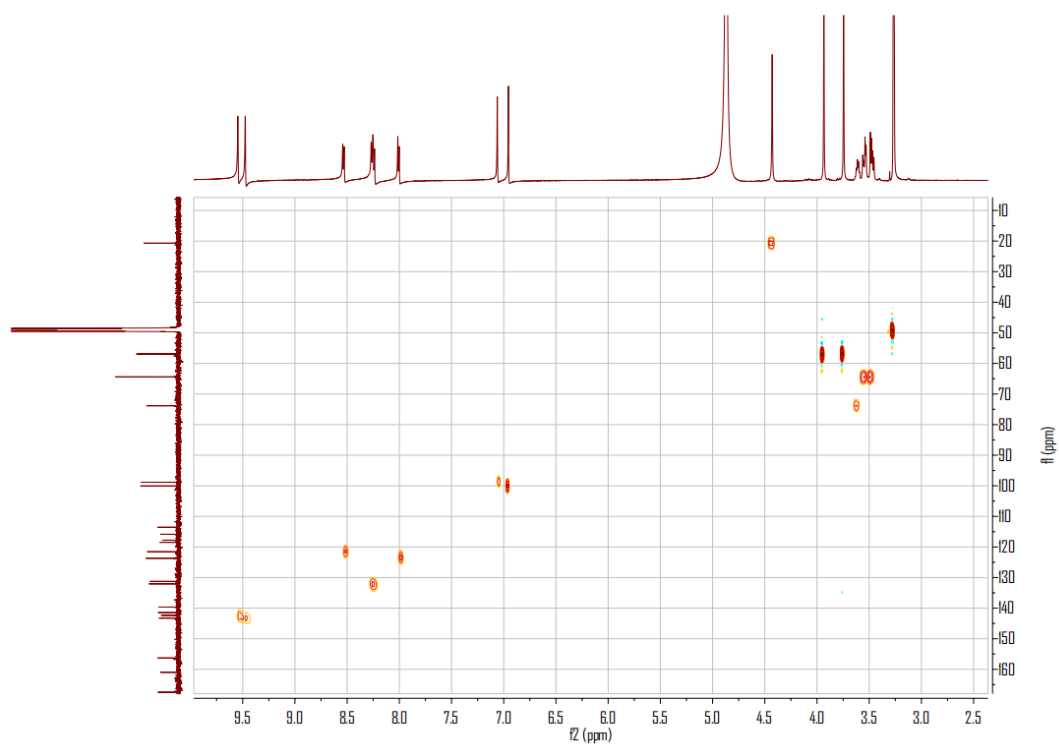

**Figure S24.** HSQC spectrum of **4** in methanol-*d*<sub>4</sub>

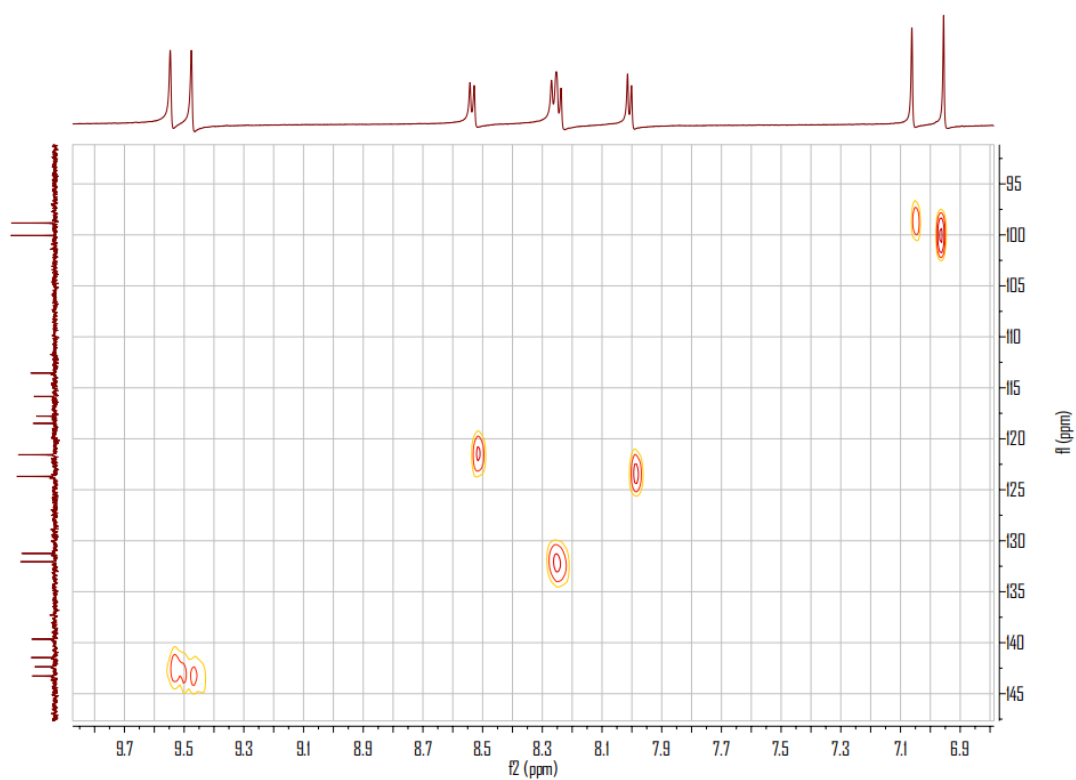

**Figure S25.** Partial HSQC spectrum of **4** in methanol-*d*<sub>4</sub>

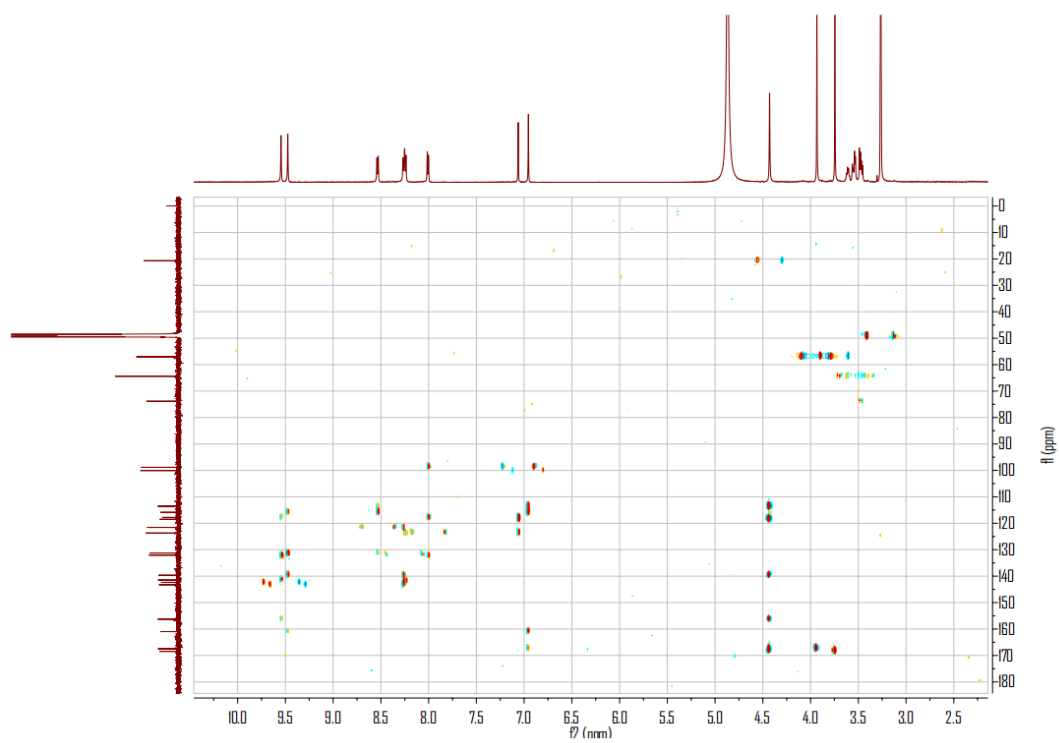

**Figure S26.** HMBC spectrum of **4** in methanol-*d*<sub>4</sub>

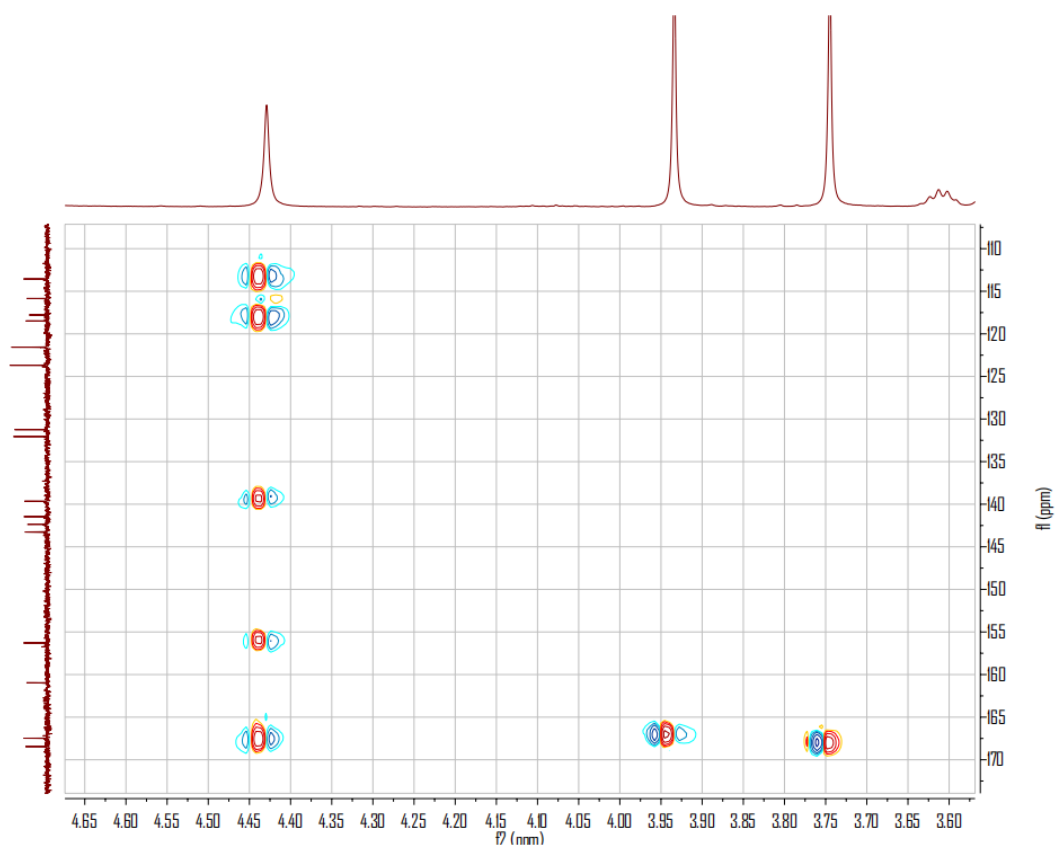

**Figure S27.** Partial HMBC spectrum of **4** in methanol-*d*<sub>4</sub>

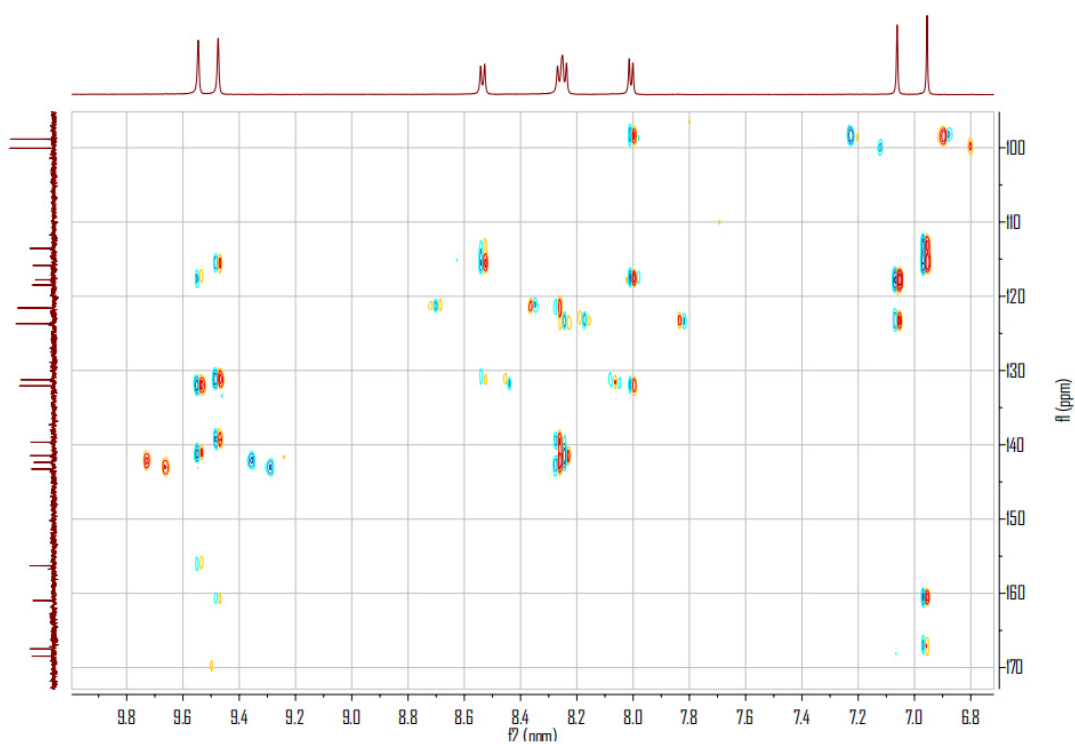

**Figure S28.** Partial HMBC spectrum of **4** in methanol-*d*<sub>4</sub>

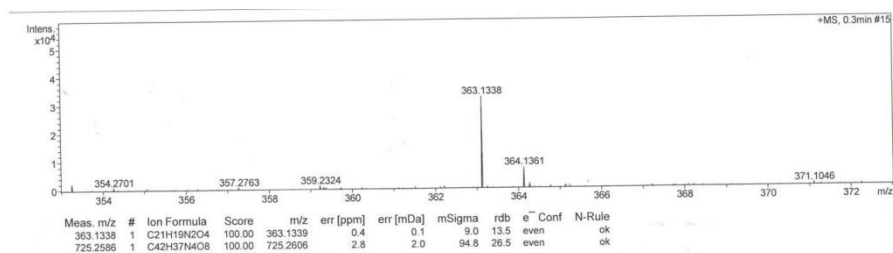

**Figure S29.** HRESIMS spectrum of **4**

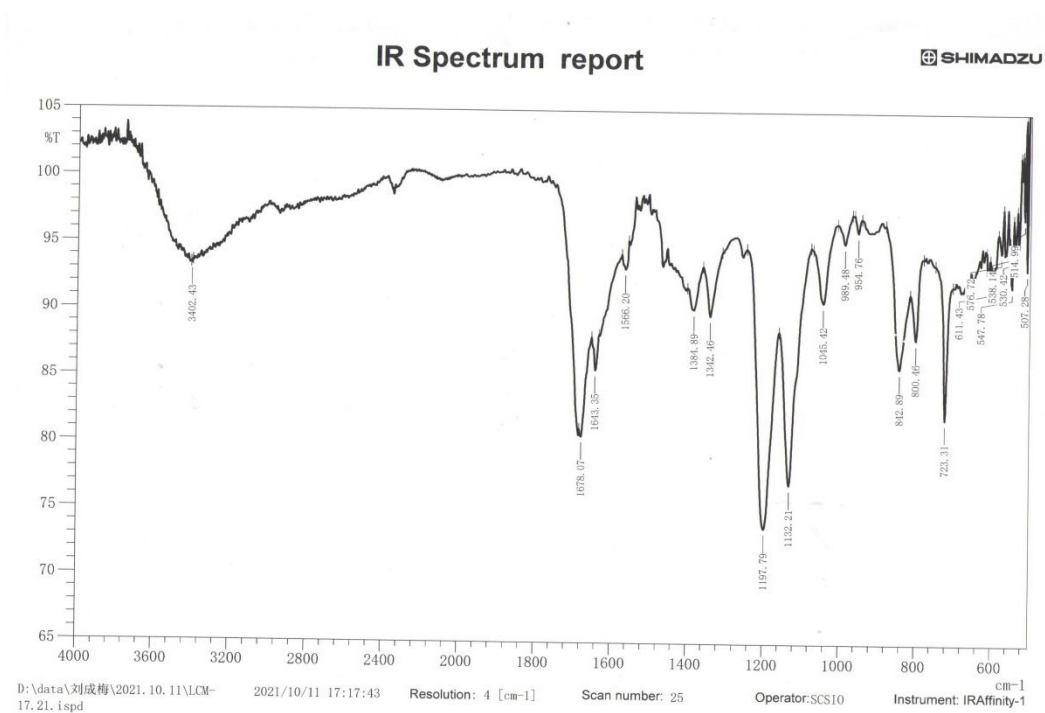

**Figure S30.** IR spectrum of **4**

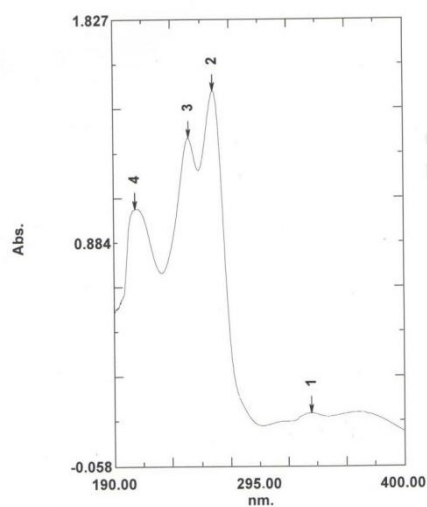

**Figure S31.** UV spectrum of **4**

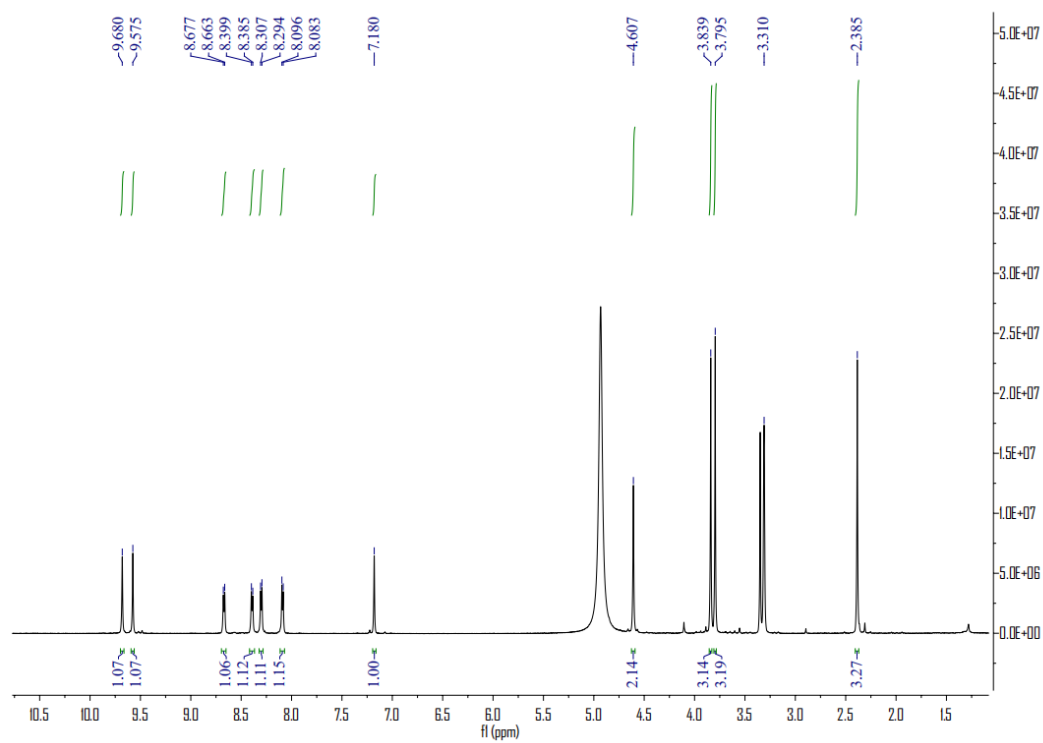

**Figure S32.** <sup>1</sup>H NMR spectrum of **5** in methanol-*d*<sub>4</sub>

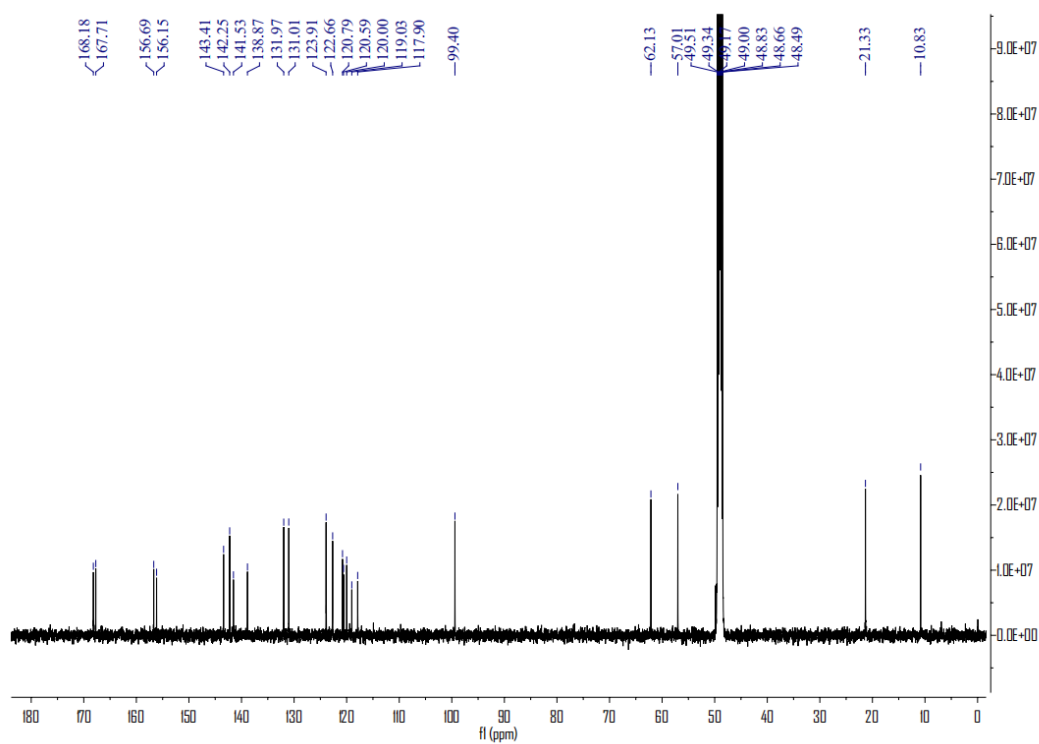

**Figure S33.** <sup>13</sup>C NMR spectrum of **5** in methanol-*d*<sub>4</sub>



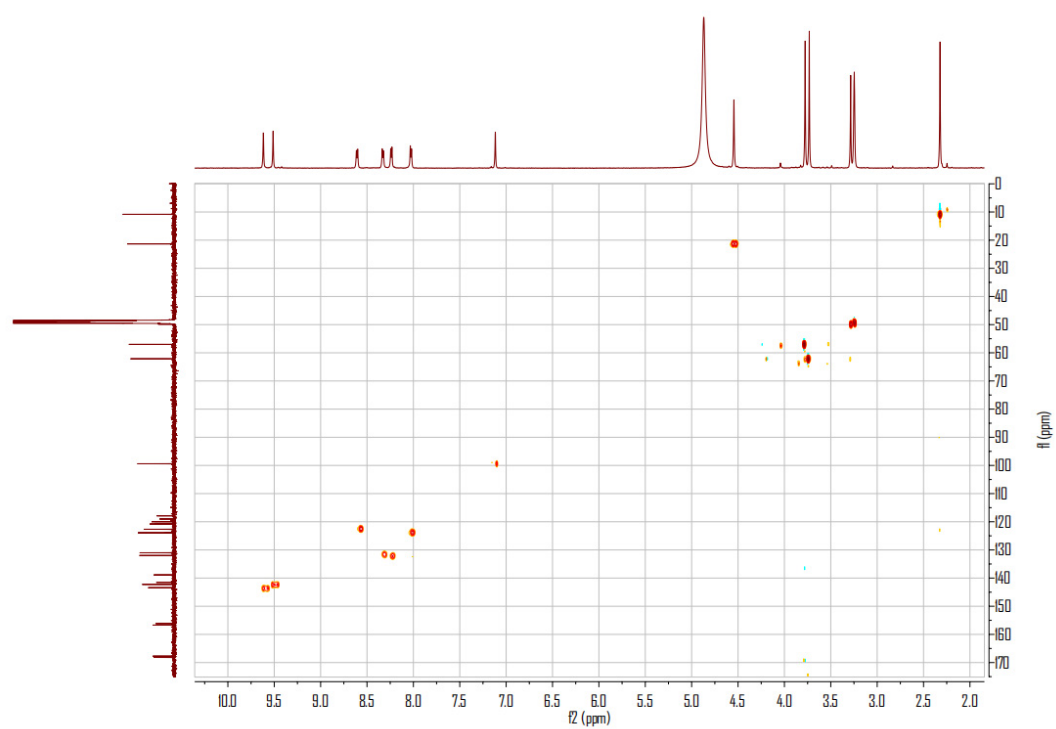

**Figure S34.** HSQC spectrum of **5** in methanol-*d*<sub>4</sub>

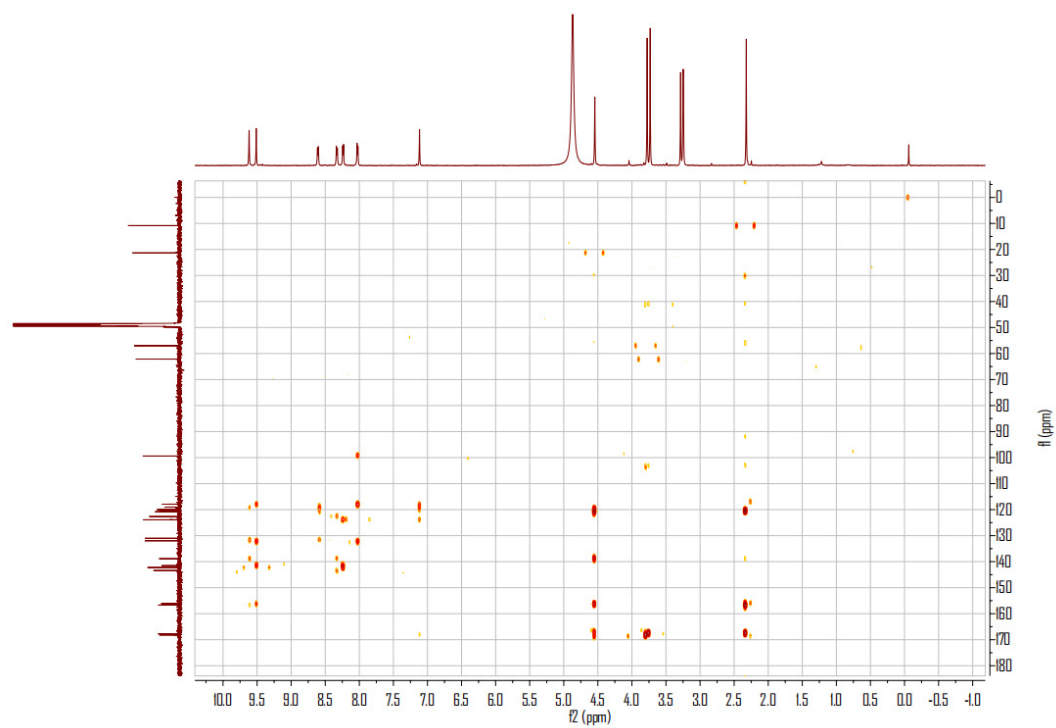

**Figure S35.** HMBC spectrum of **5** in methanol-*d*<sub>4</sub>

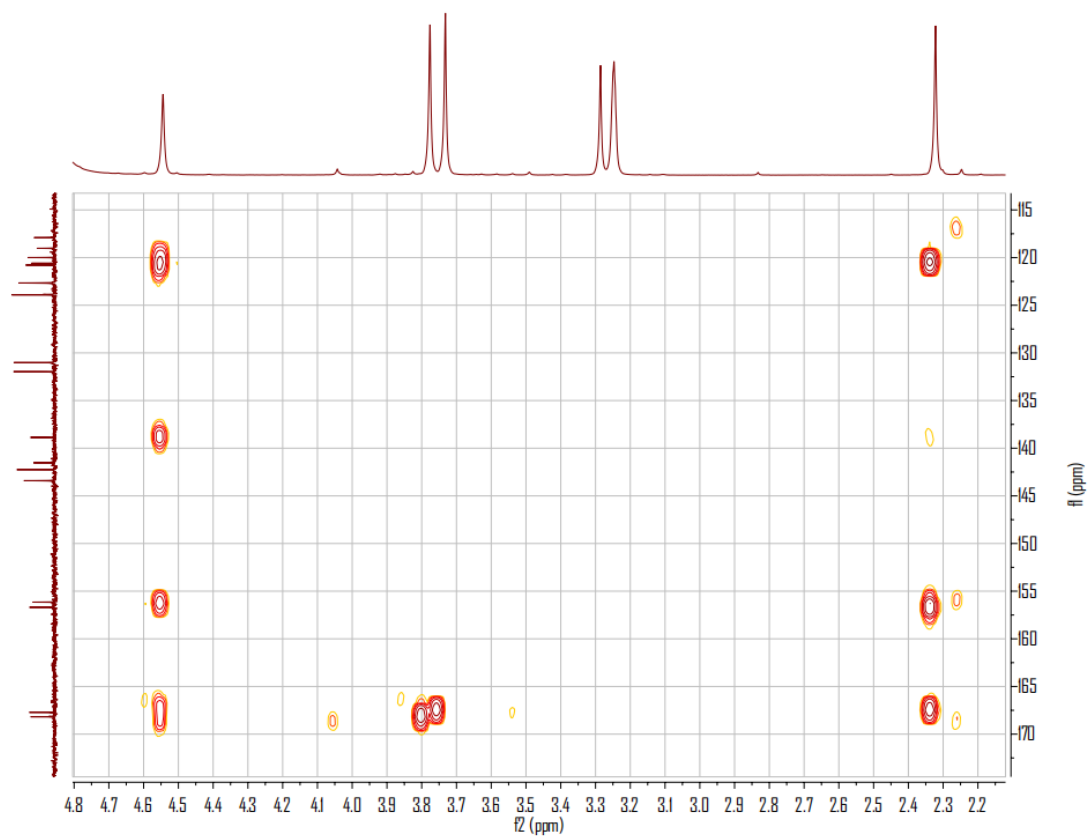

**Figure S36.** Partial HMBC spectrum of **5** in methanol-*d*<sub>4</sub>

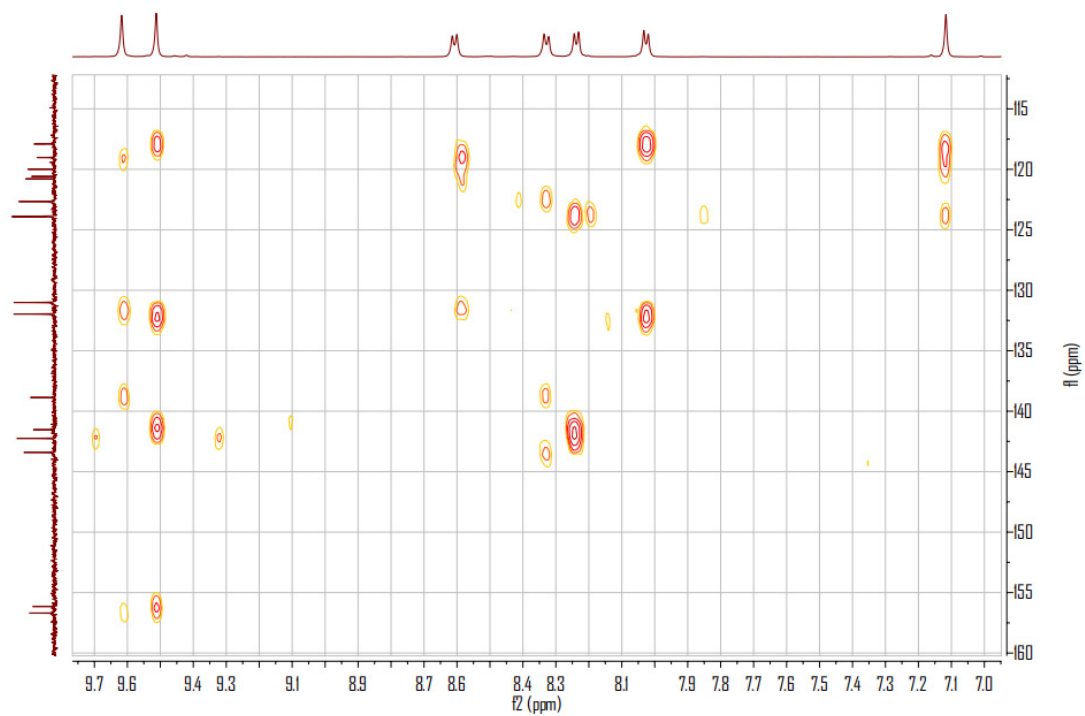

**Figure S37.** Partial HMBC spectrum of **5** in methanol-*d*<sub>4</sub>

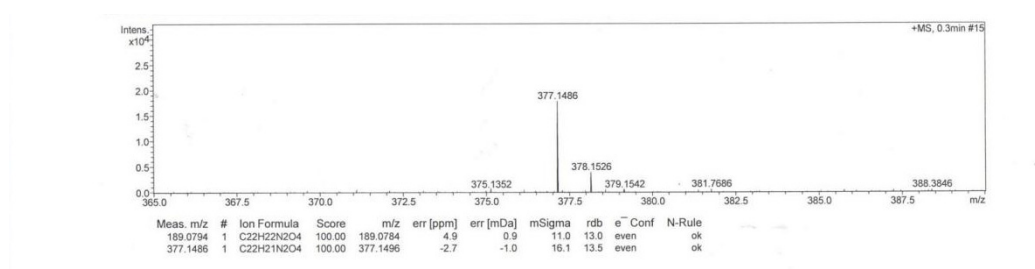

**Figure S38.** HRESIMS spectrum of **5**

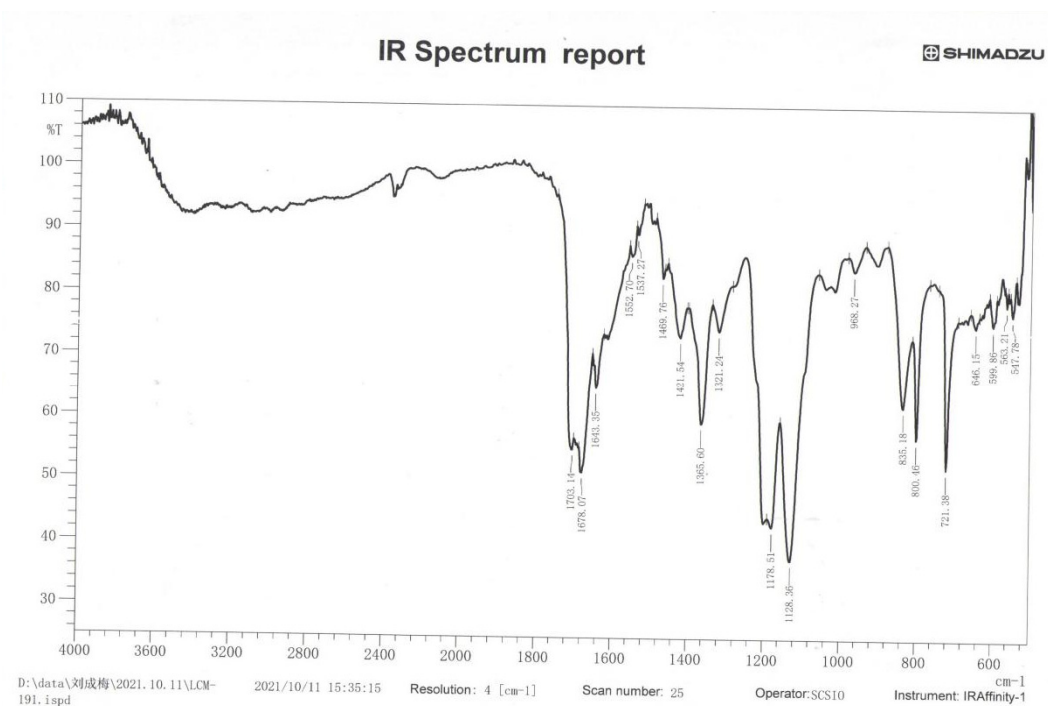

**Figure S39.** IR spectrum of **5**

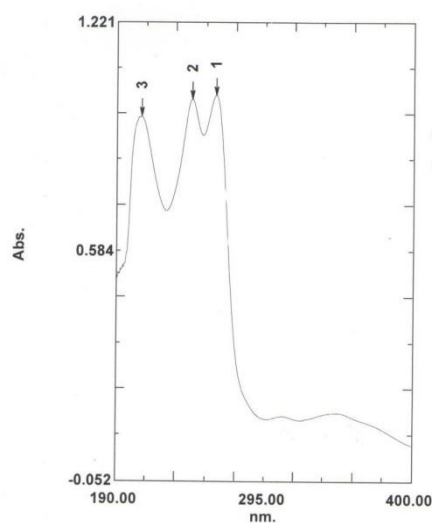

**Figure S40.** UV spectrum of **5**

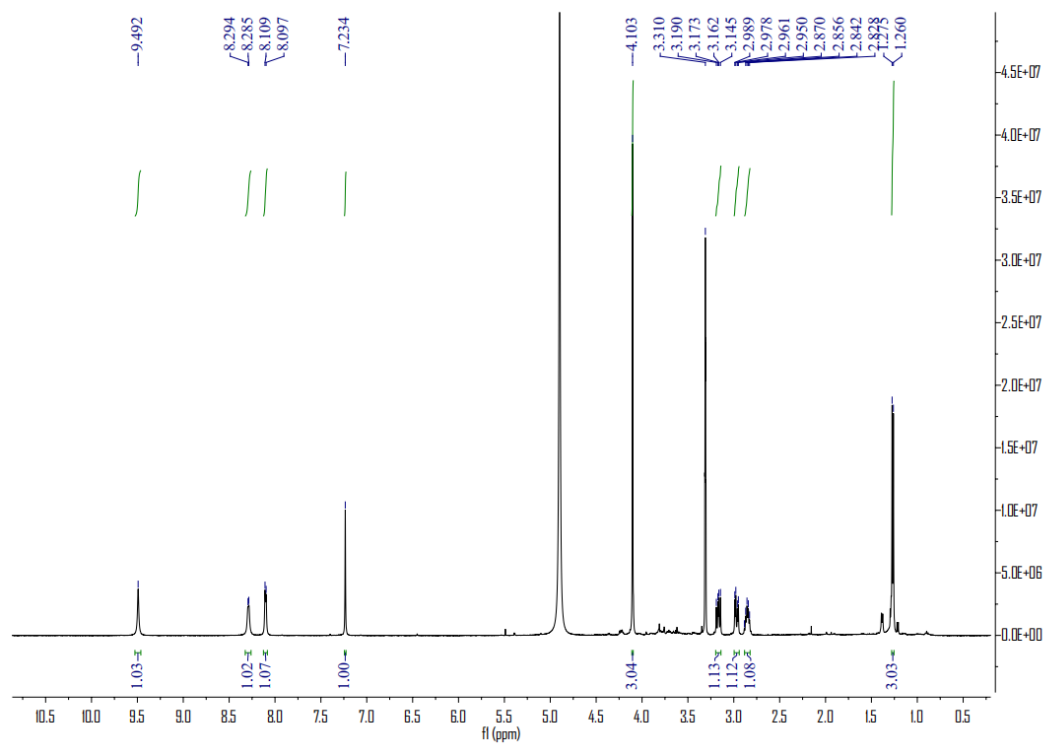

**Figure S41.** <sup>1</sup>H NMR spectrum of **6** in methanol-*d*<sub>4</sub>

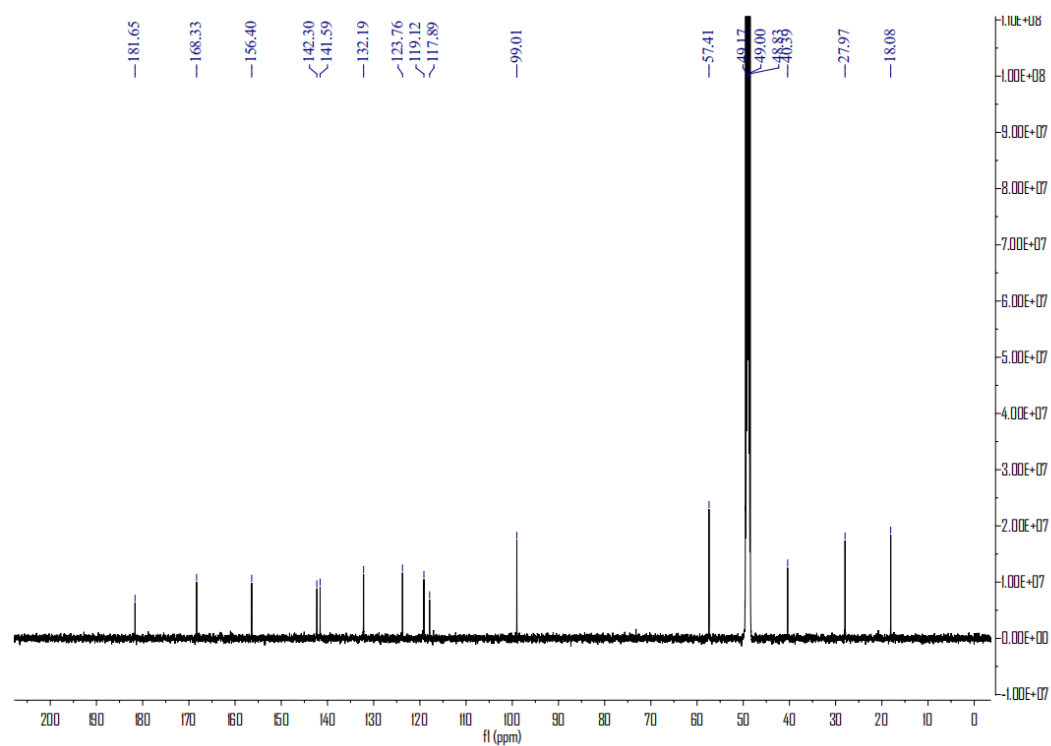

**Figure S42.** <sup>13</sup>C NMR spectrum of **6** in methanol-*d*<sub>4</sub>

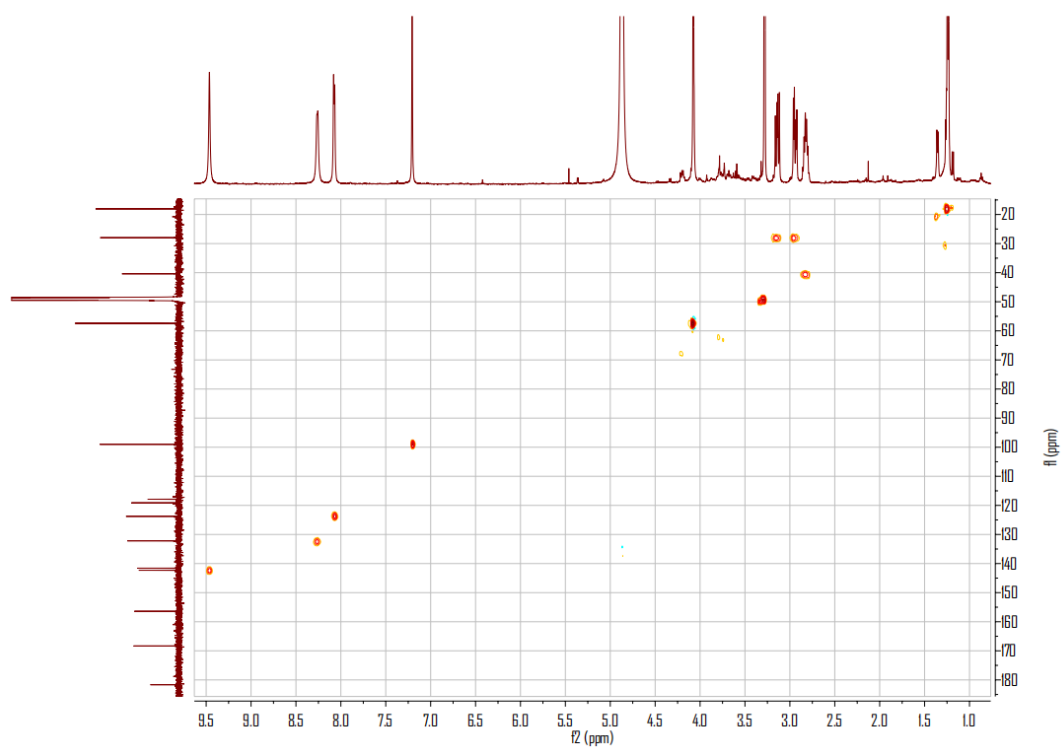

**Figure S43.** HSQC spectrum of **6** in methanol-*d*<sub>4</sub>

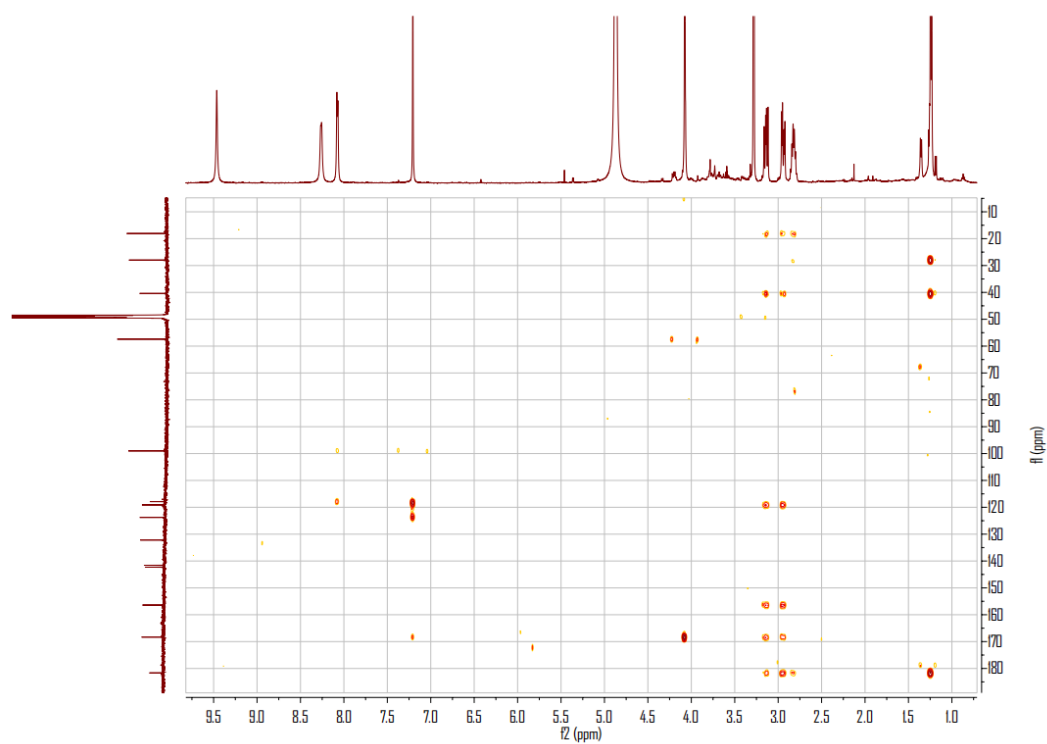

**Figure S44.** HMBC spectrum of **6** in methanol-*d*<sub>4</sub>

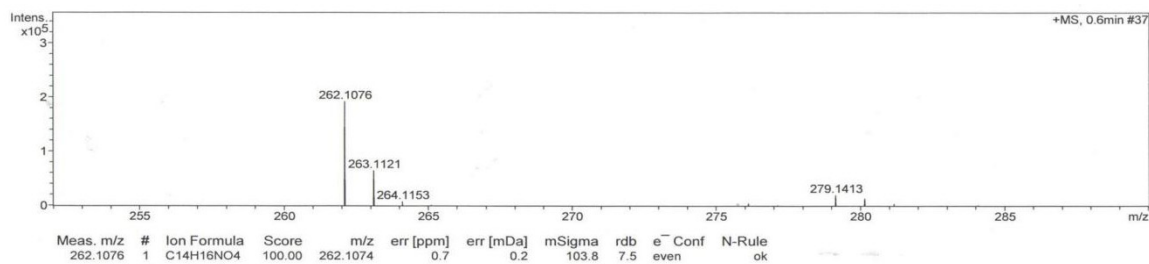

**Figure S45.** HRESIMS spectrum of **6**

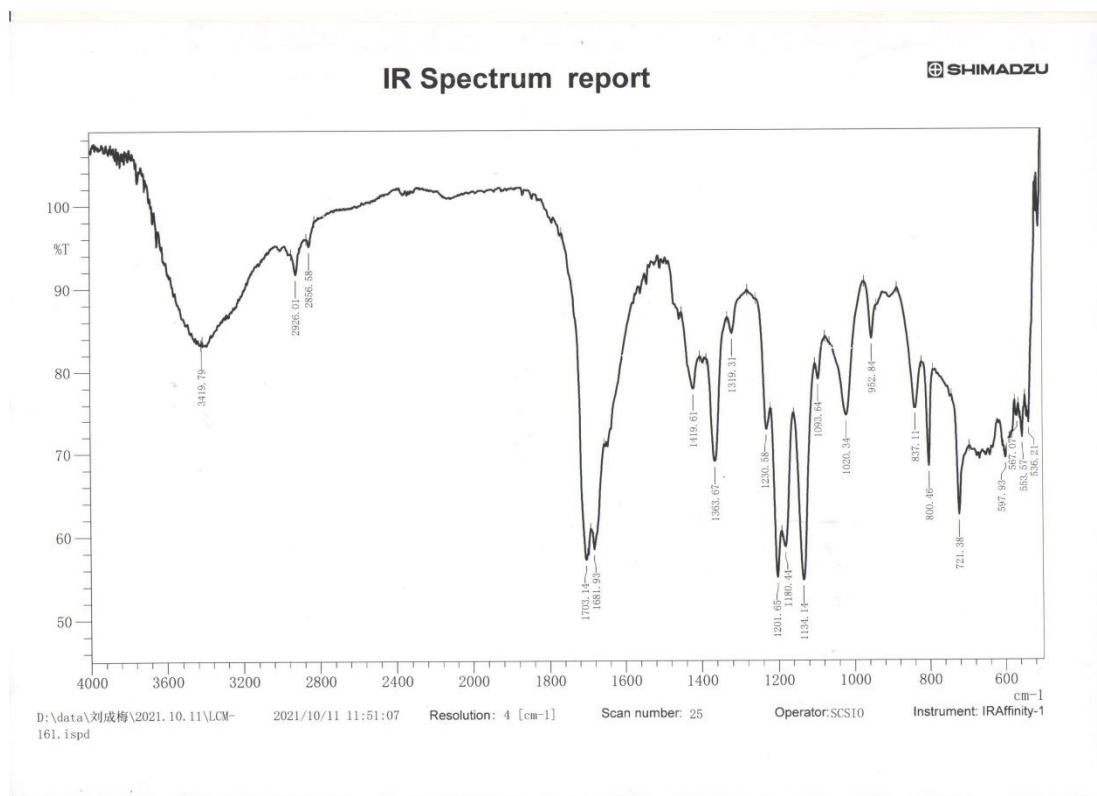

**Figure S46.** IR spectrum of **6**

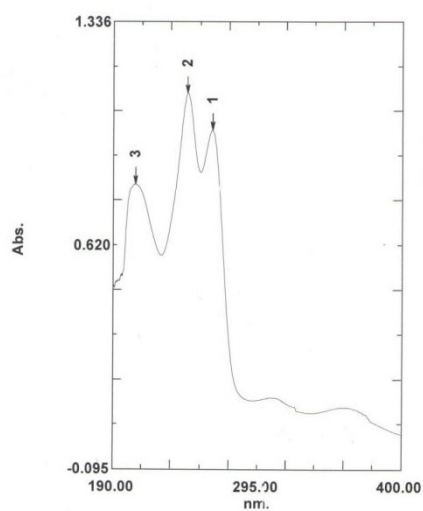

**Figure S47.** UV spectrum of **6**

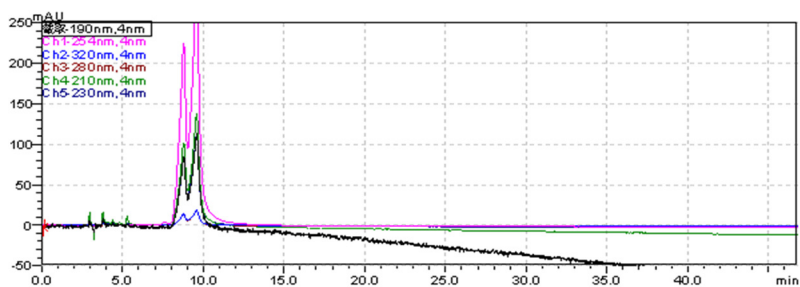

Figure S48. Chirality analysis of compound **6**

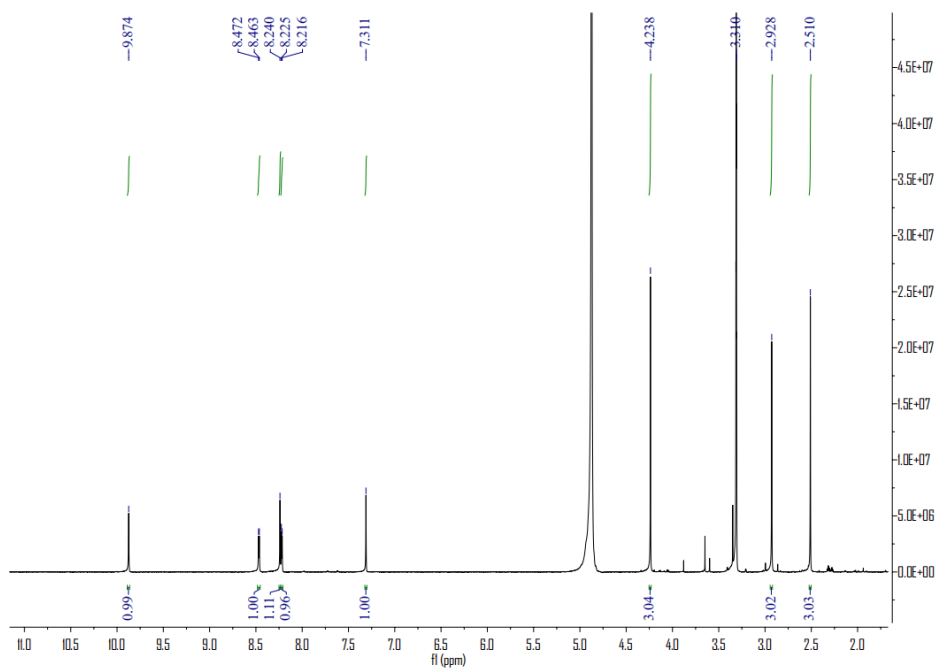

Figure S49.  $^1\text{H}$  NMR spectrum of **7** in methanol- $d_4$

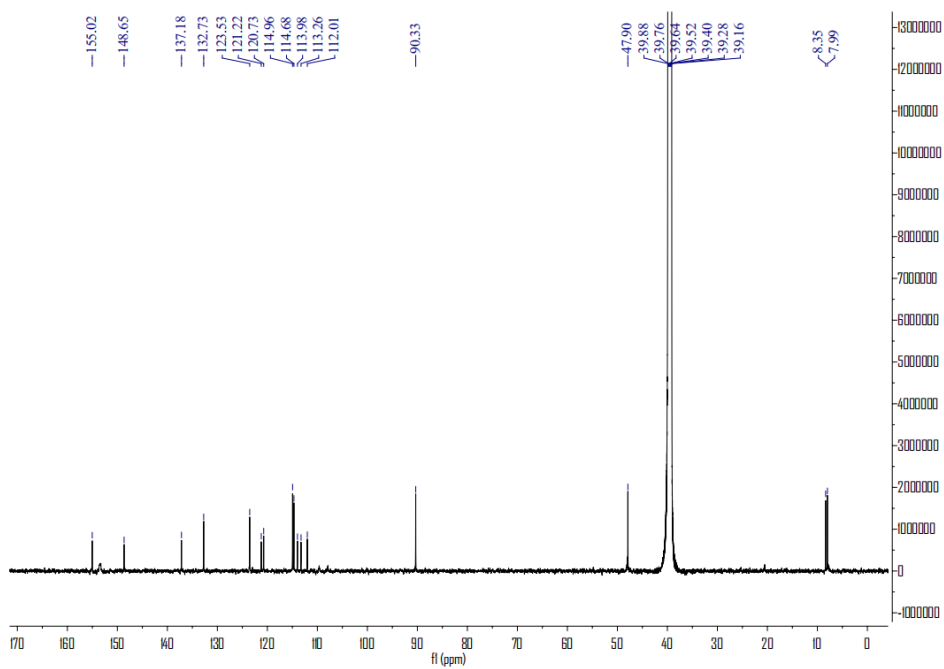

Figure S50.  $^{13}\text{C}$  NMR spectrum of **7** in methanol- $d_4$

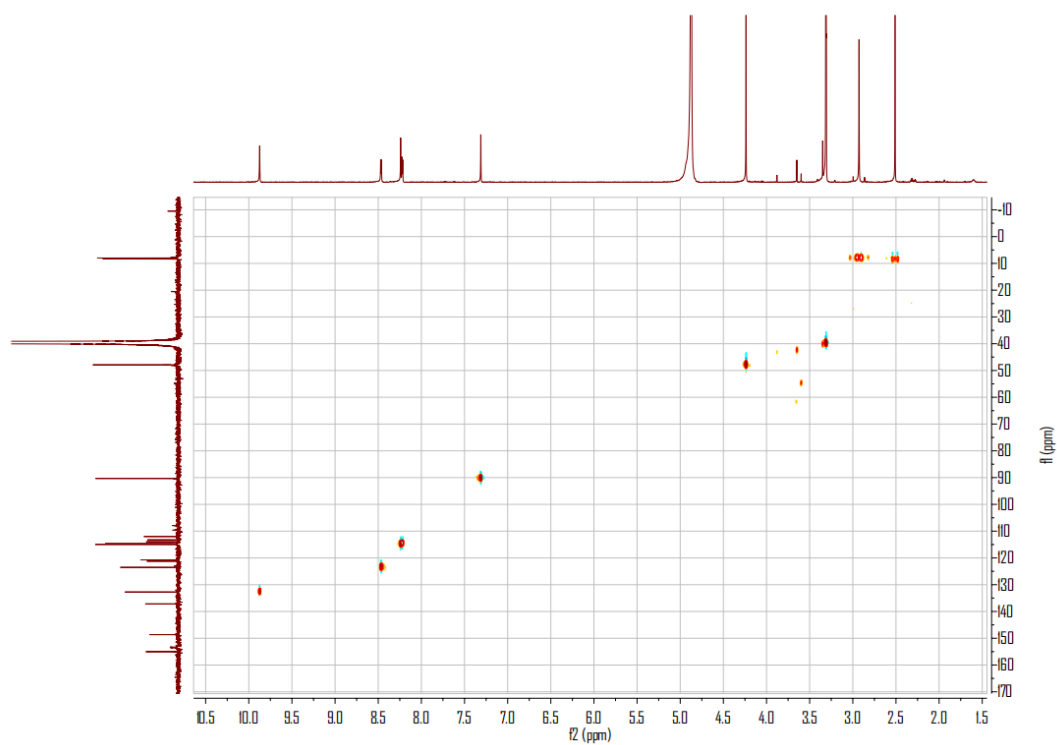

**Figure S51.** HSQC spectrum of **7** in methanol-*d*<sub>4</sub>

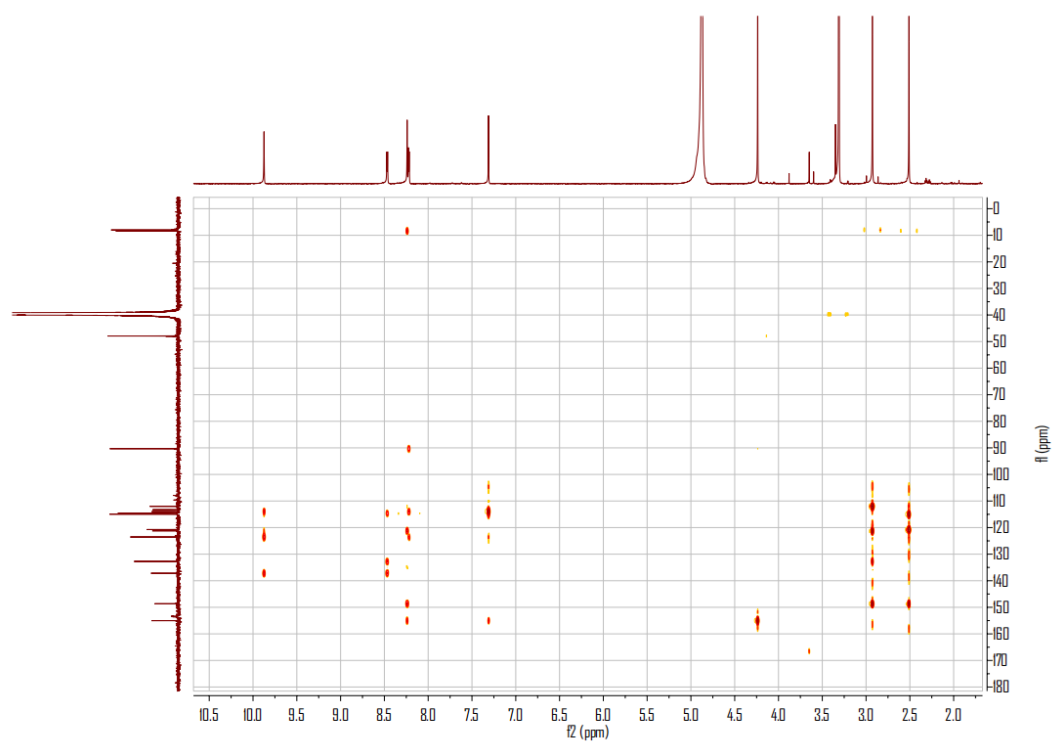

**Figure S52.** HMBC spectrum of **7** in methanol-*d*<sub>4</sub>



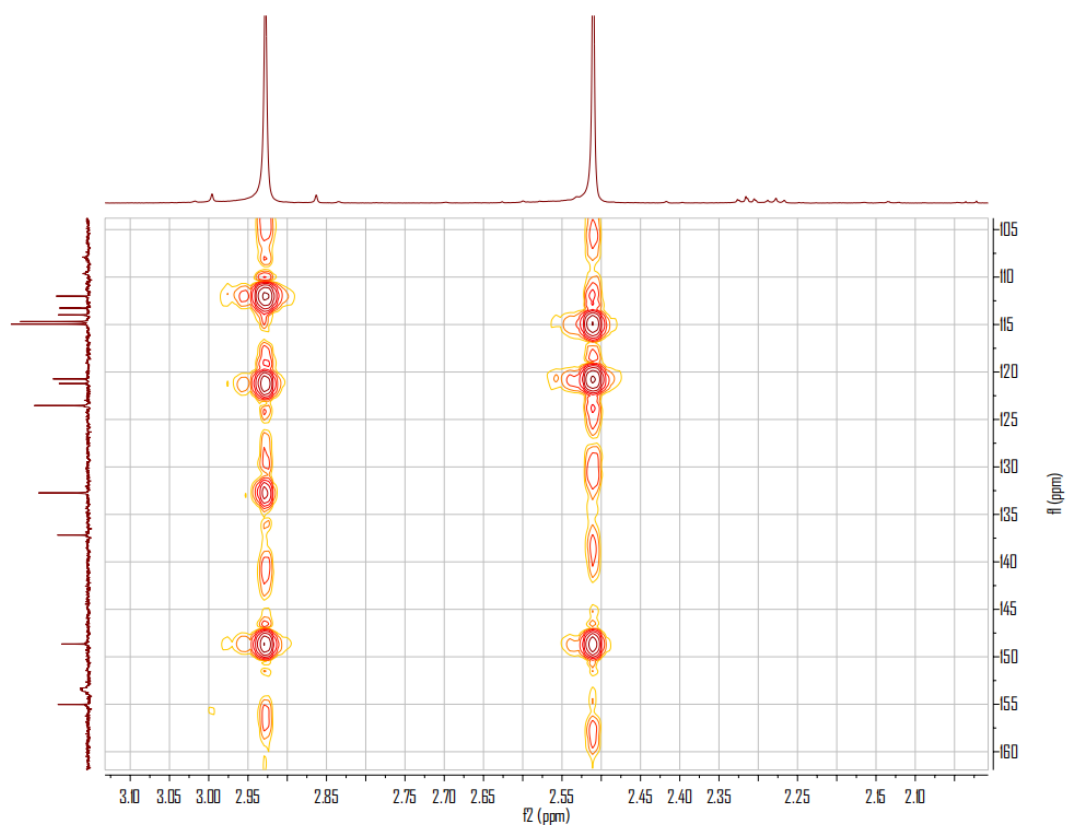

**Figure S53.** Partial HMBC spectrum of **7** in methanol- $d_4$

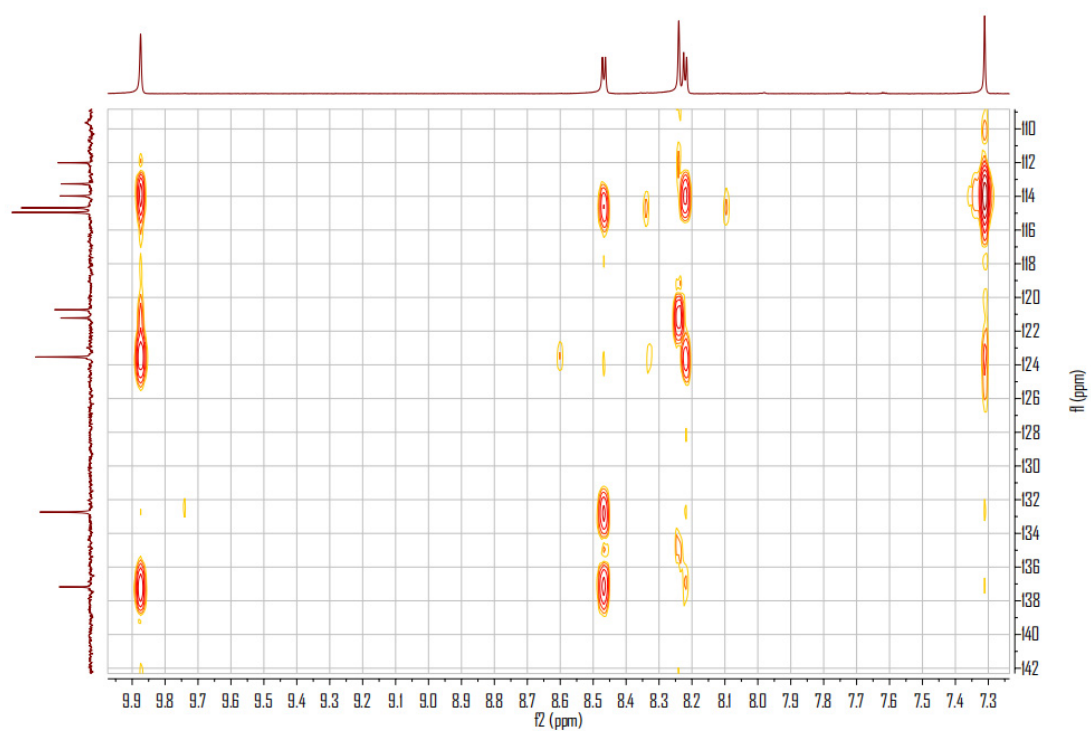

**Figure S54.** Partial HMBC spectrum of **7** in methanol- $d_4$

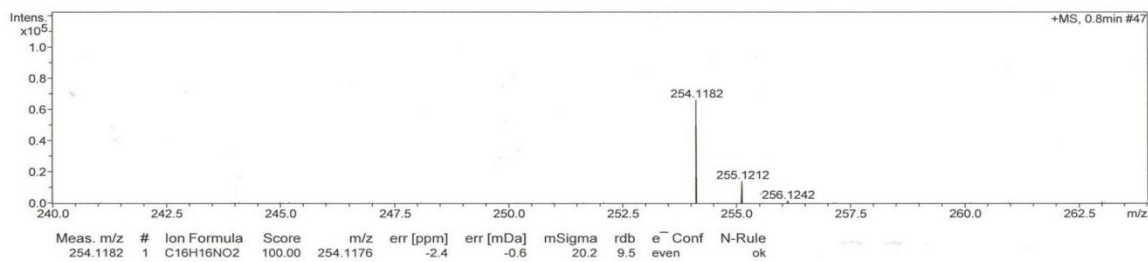

Figure S55. HRESIMS spectrum of 7

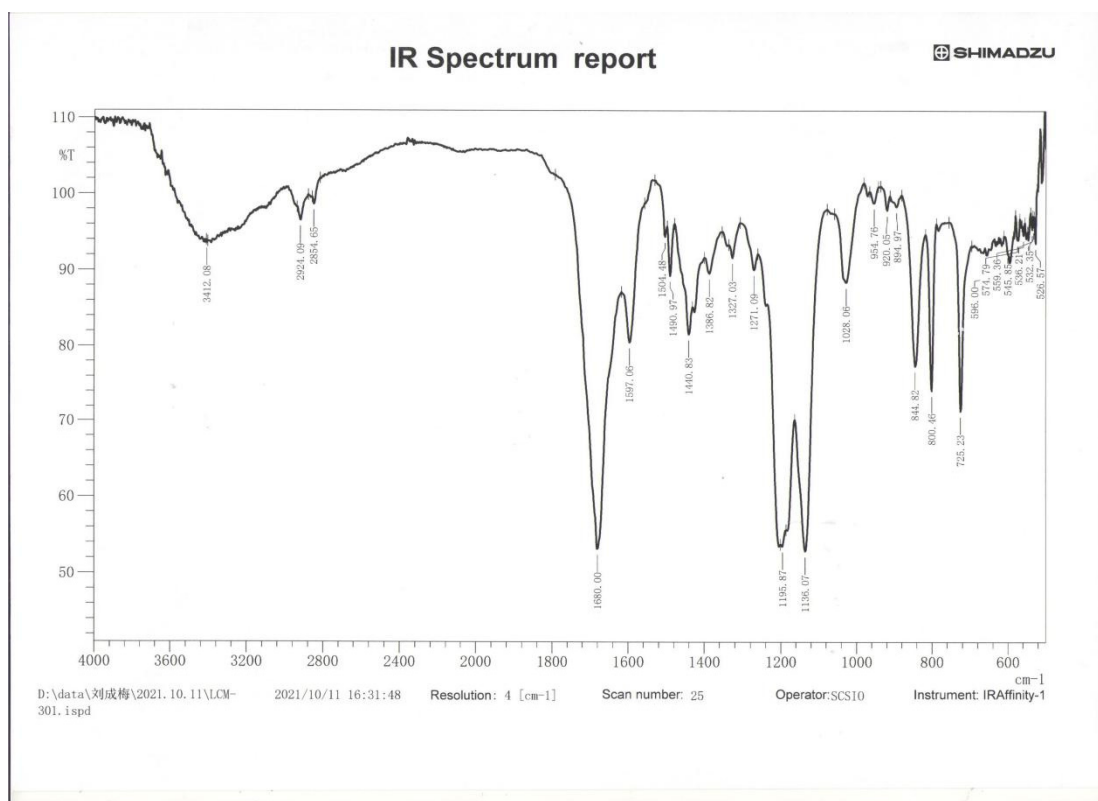

Figure S56. IR spectrum of 7

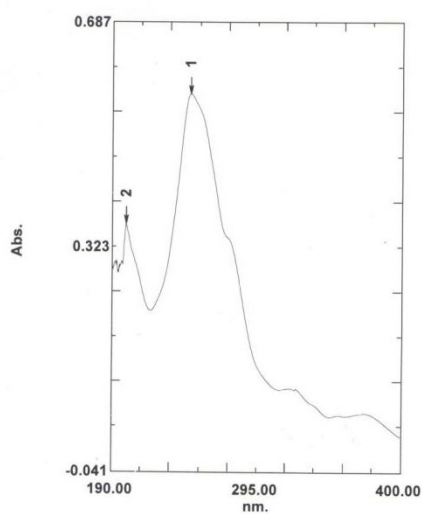

Figure S57. UV spectrum of 7

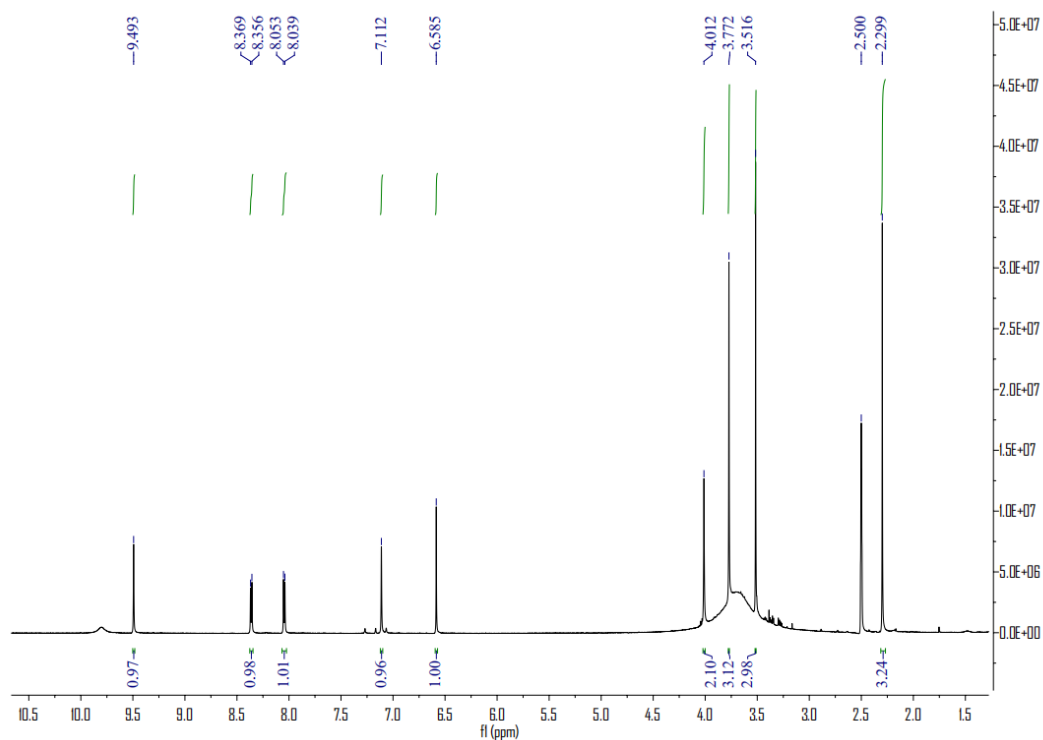

**Figure S58.** <sup>1</sup>H NMR spectrum of **8** in DMSO-*d*<sub>6</sub>

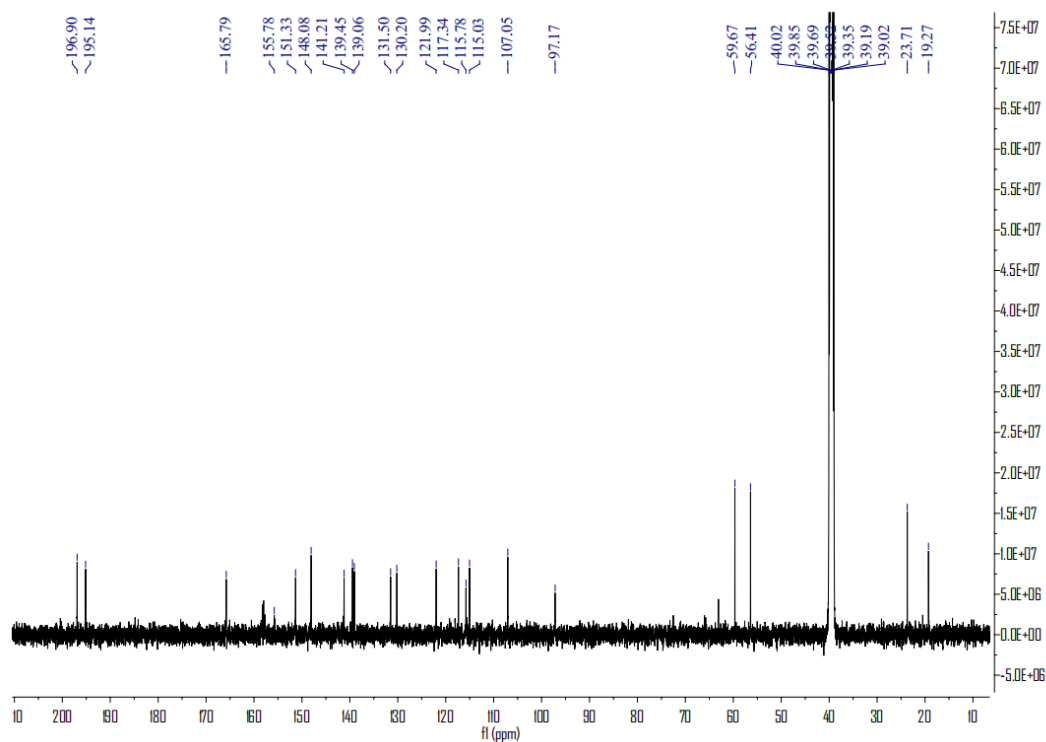

**Figure S59.** <sup>13</sup>C NMR spectrum of **8** in DMSO-*d*<sub>6</sub>

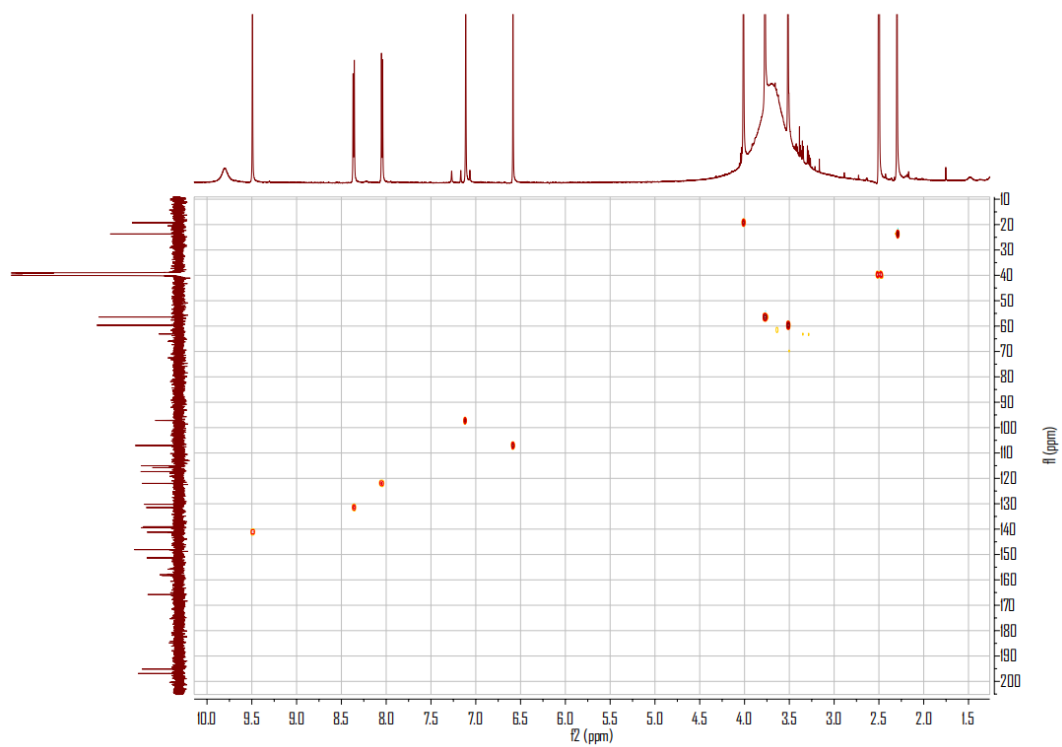

**Figure S60.** HSQC spectrum of **8** in DMSO-*d*<sub>6</sub>

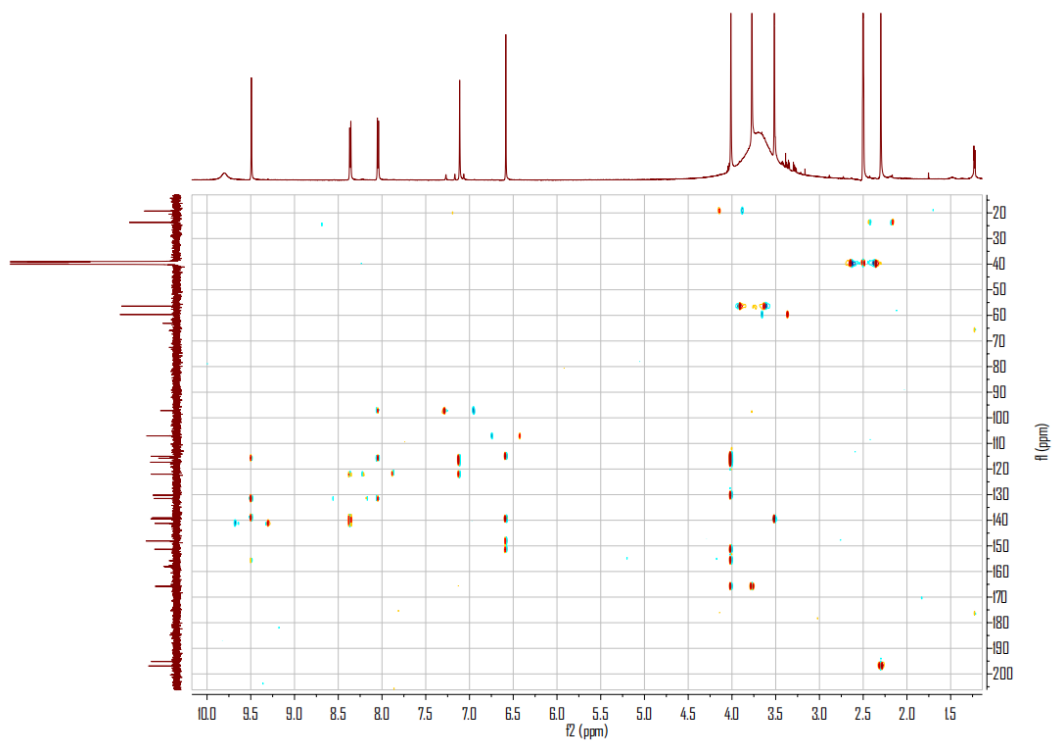

**Figure S61.** HMBC spectrum of **8** in DMSO-*d*<sub>6</sub>

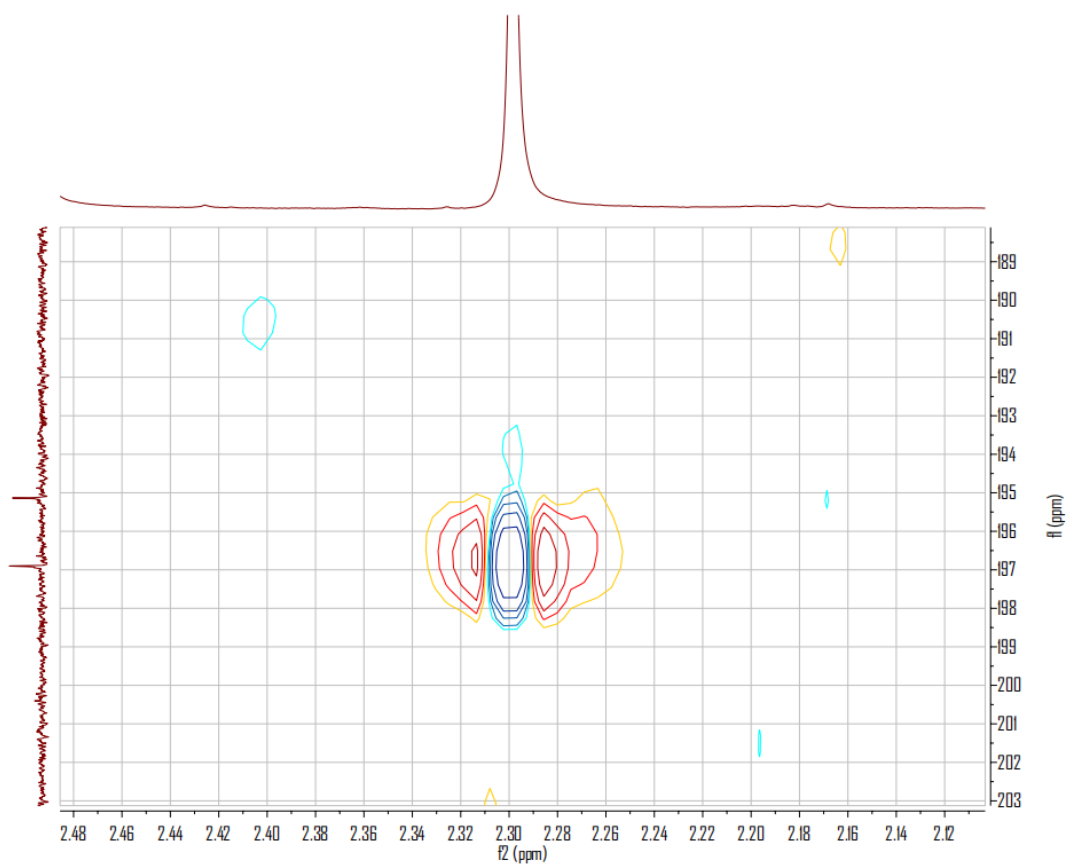

**Figure S62.** Partial HMBC spectrum of **8** in DMSO- $d_6$

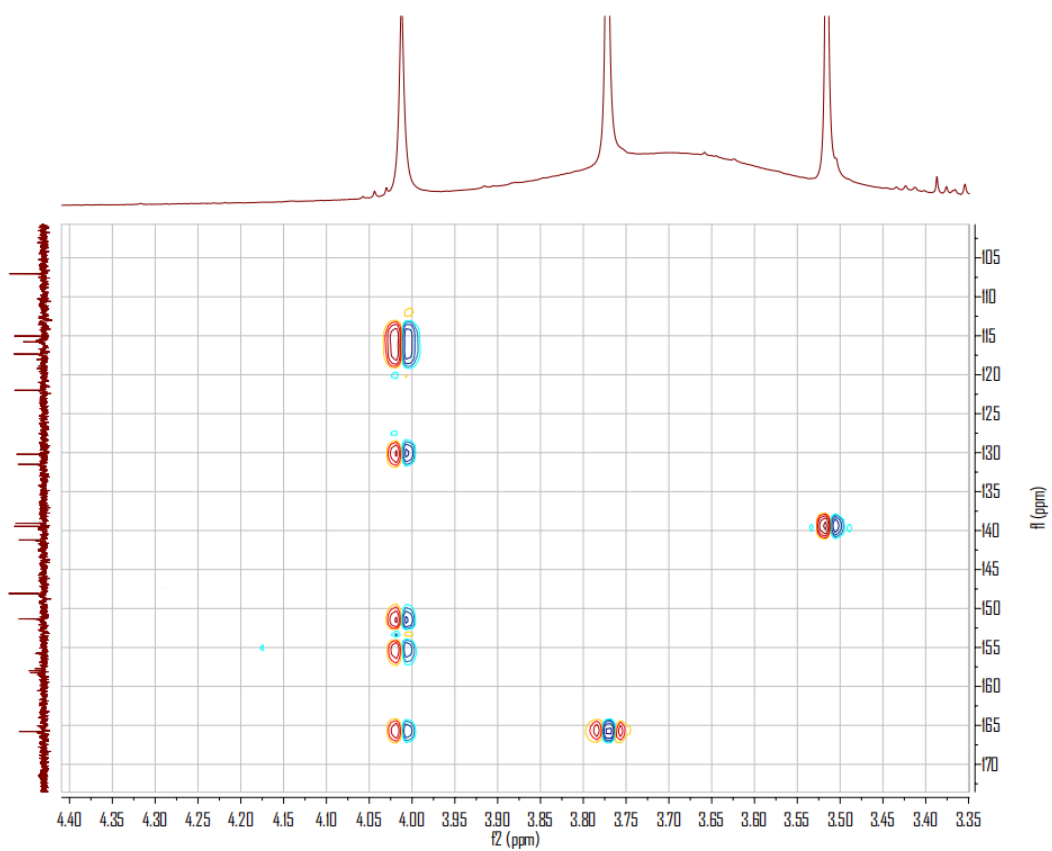

**Figure S63.** Partial HMBC spectrum of **8** in DMSO- $d_6$

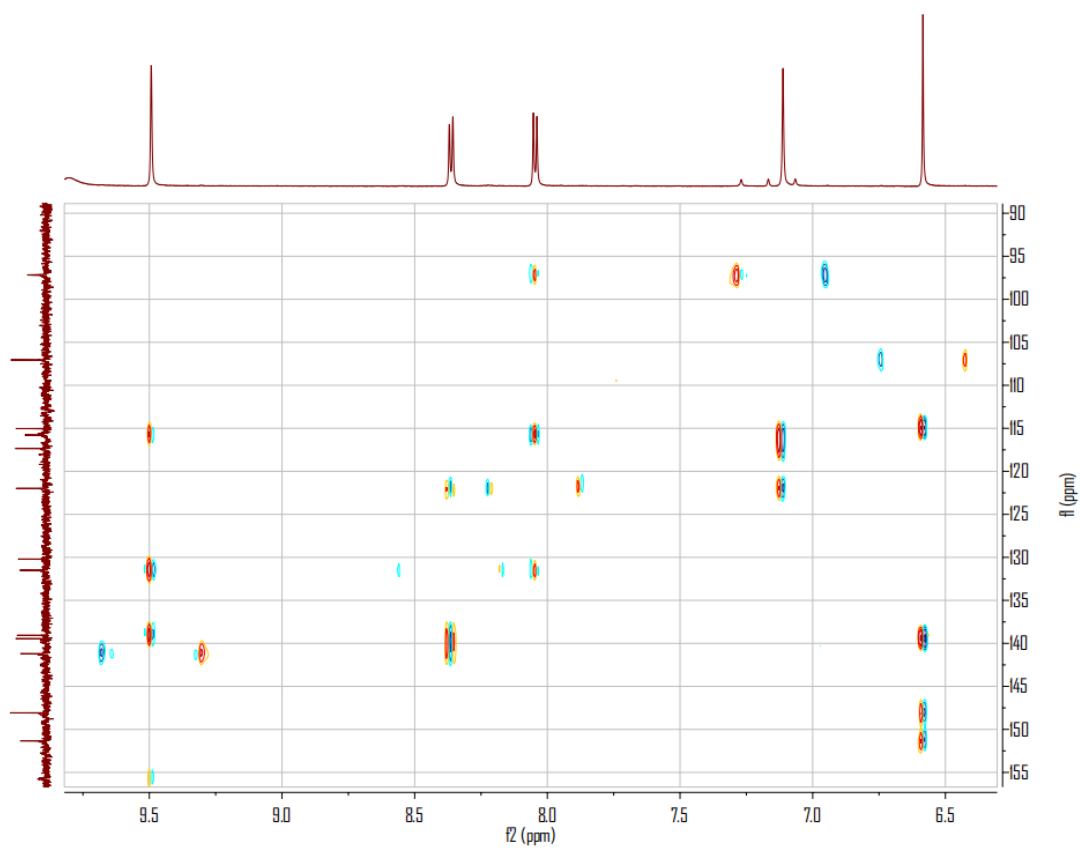

**Figure S64.** Partial HMBC spectrum of **8** in DMSO- $d_6$

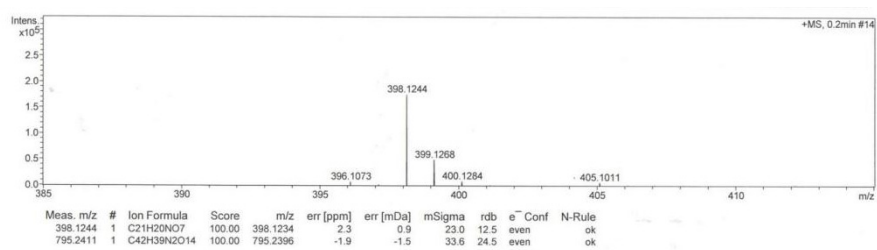

**Figure S65.** HRESIMS spectrum of **8**

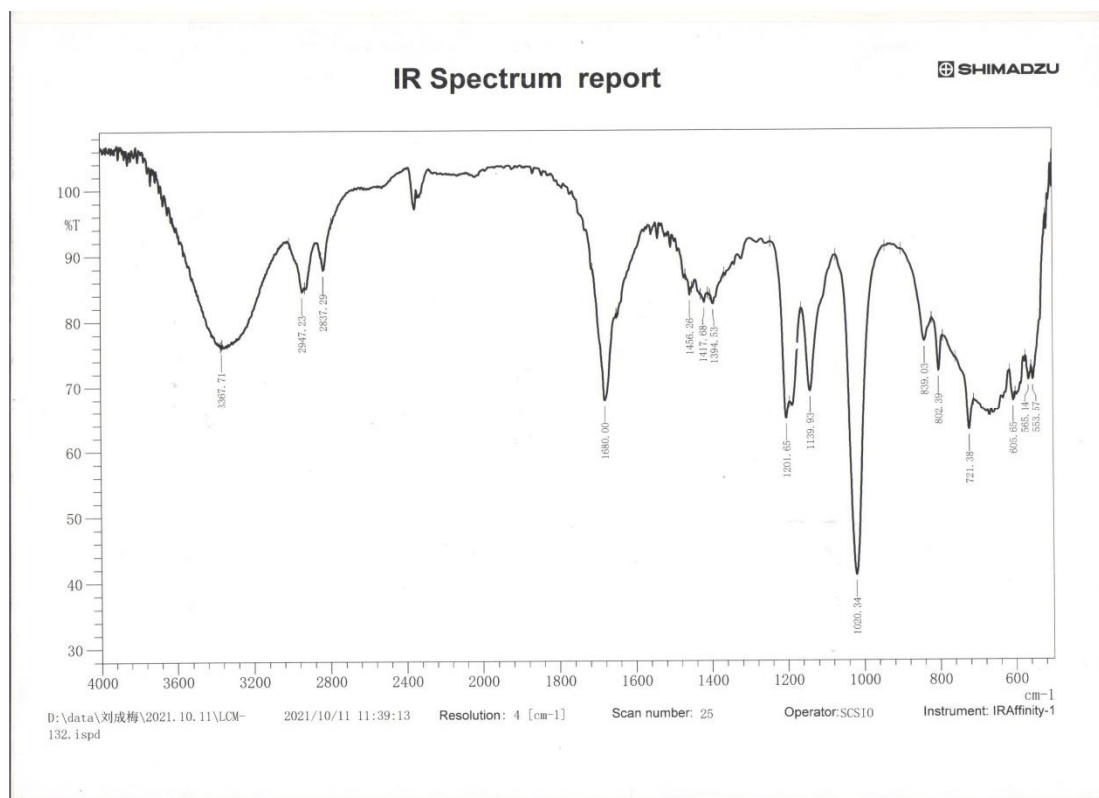

**Figure S66.** IR spectrum of **8**

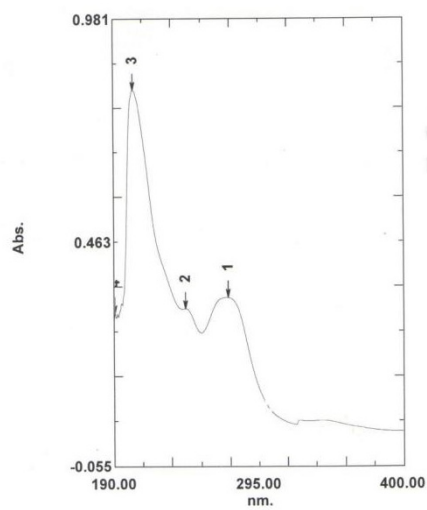

**Figure S67.** UV spectrum of **8**

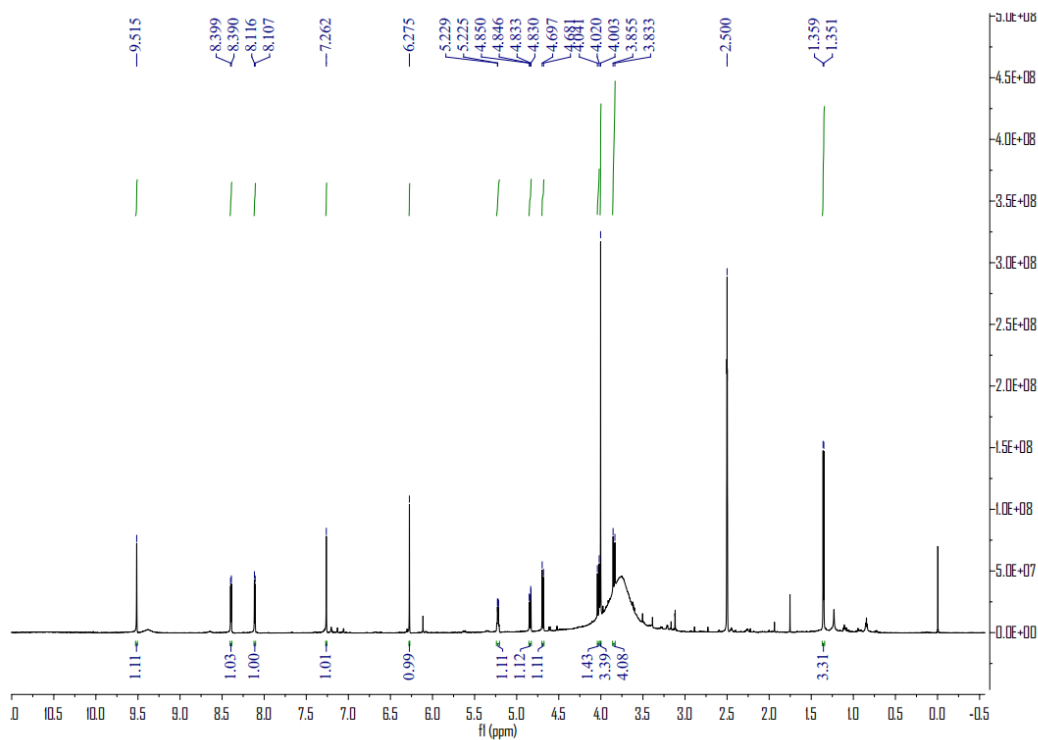

**Figure S68.** <sup>1</sup>H NMR spectrum of **9** in DMSO-*d*<sub>6</sub>

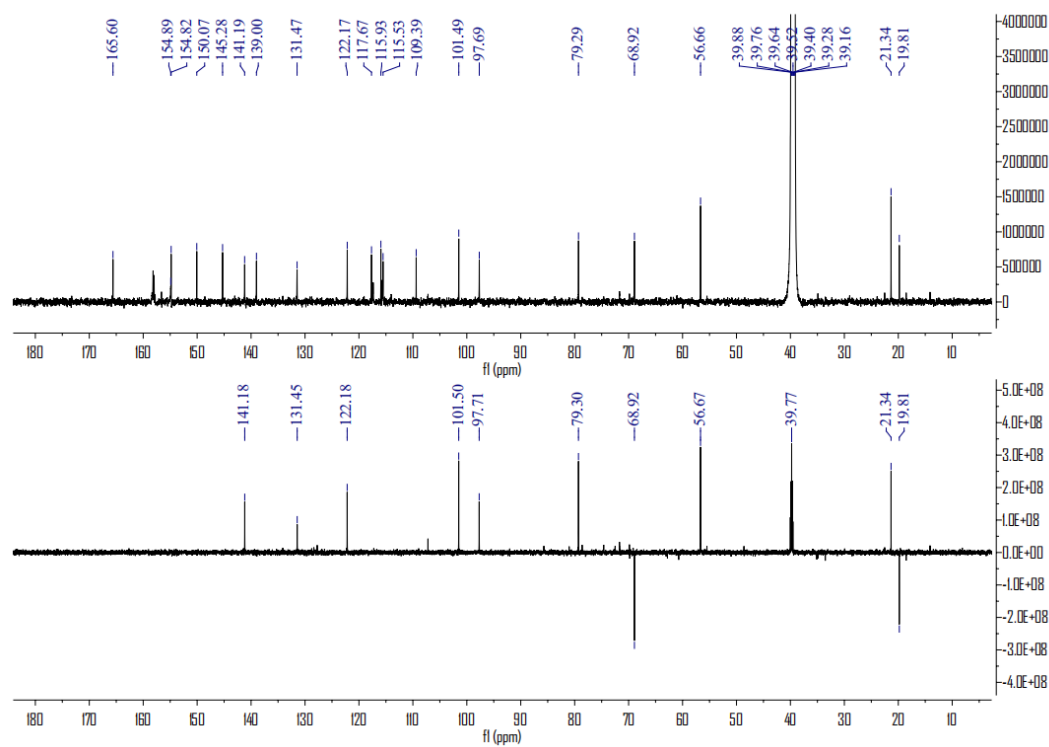

**Figure S69.** <sup>13</sup>C and DEPT135 NMR spectra of **9** in DMSO-*d*<sub>6</sub>



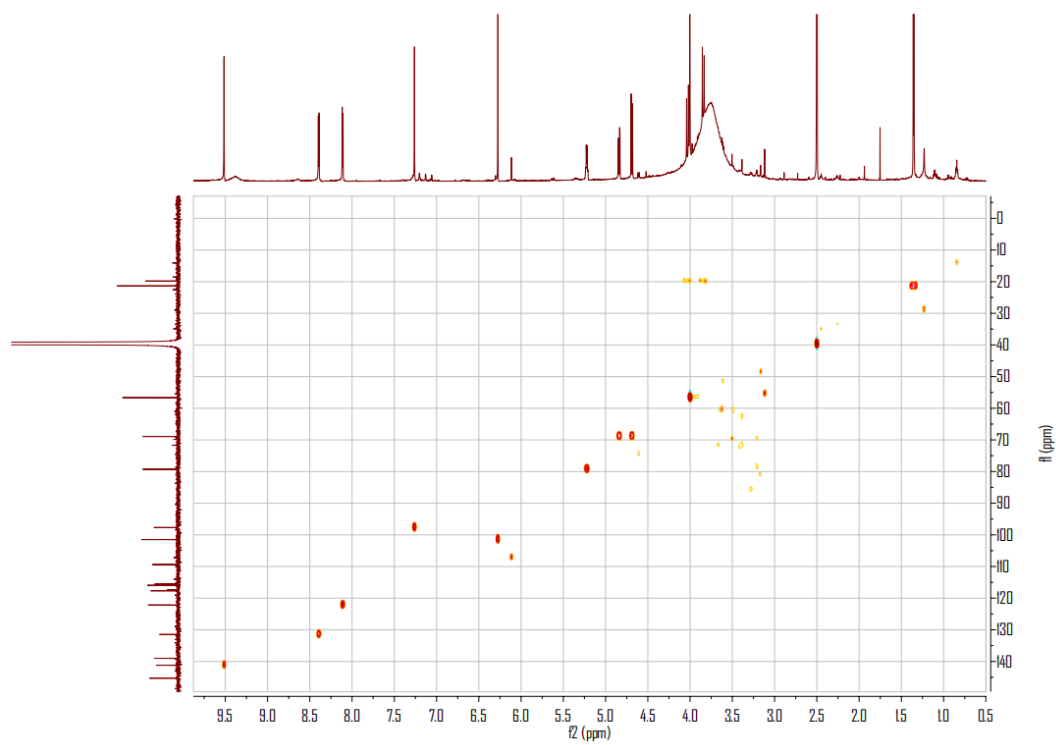

**Figure S70.** HSQC spectrum of **9** in DMSO-*d*<sub>6</sub>

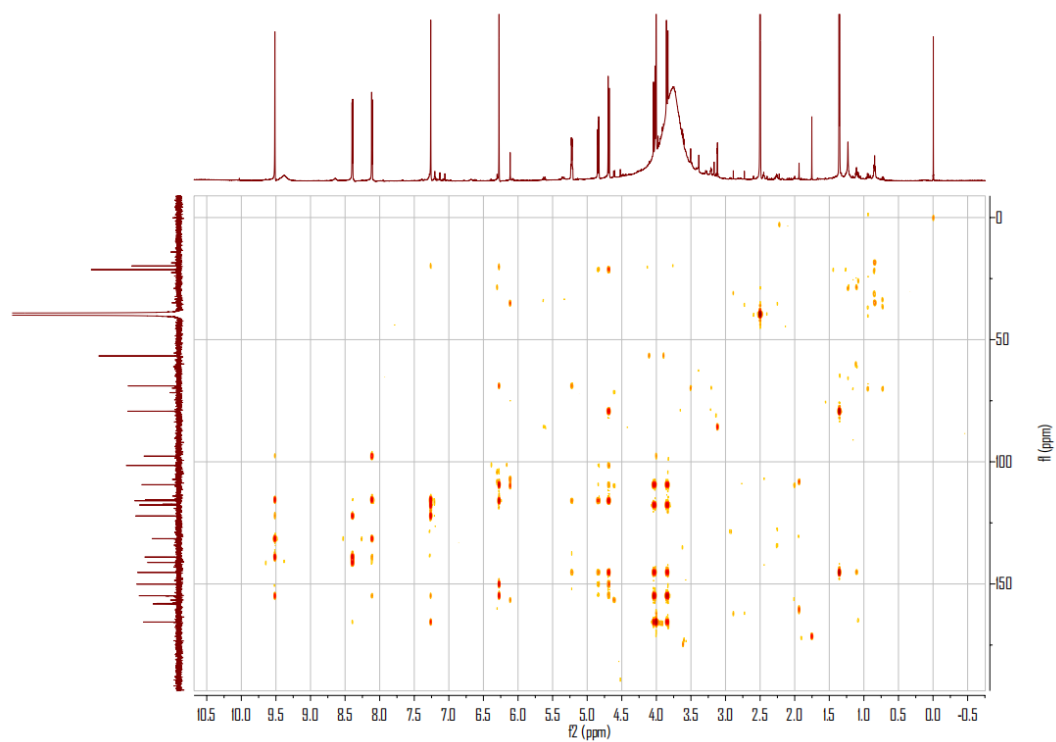

**Figure S71.** HMBC spectrum of **9** in DMSO-*d*<sub>6</sub>

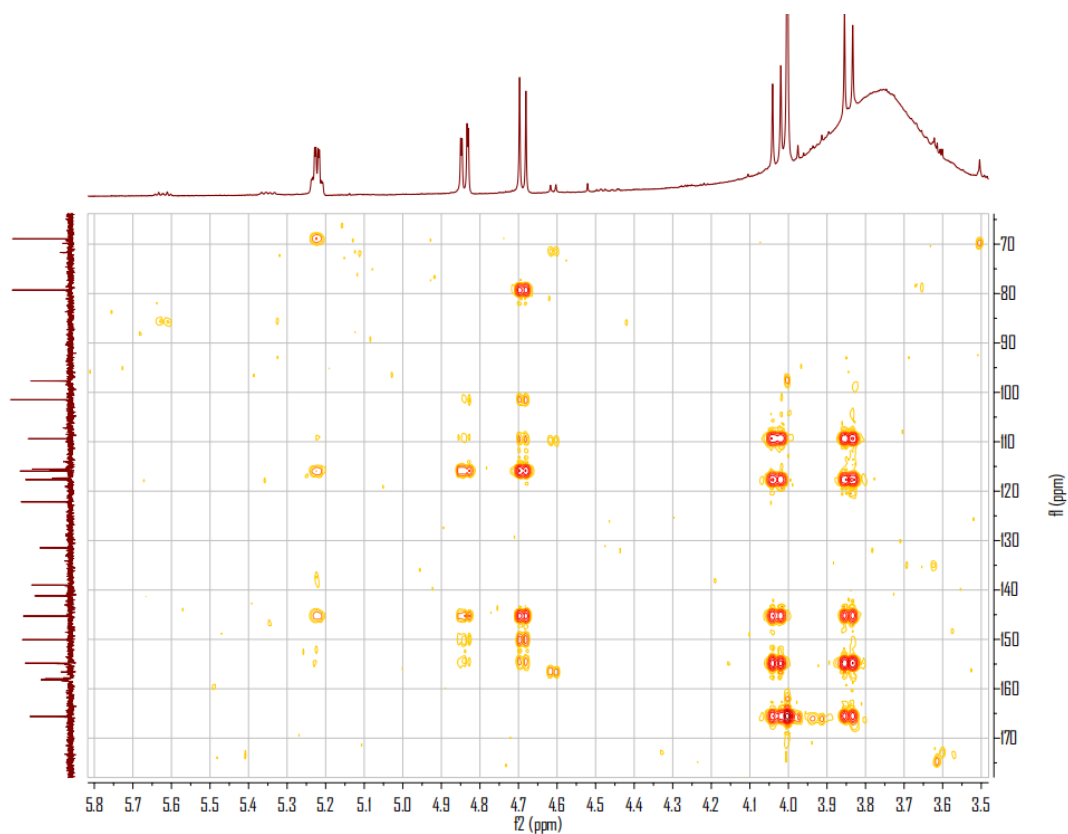

**Figure S72.** Partial HMBC spectrum of **9** in DMSO- $d_6$

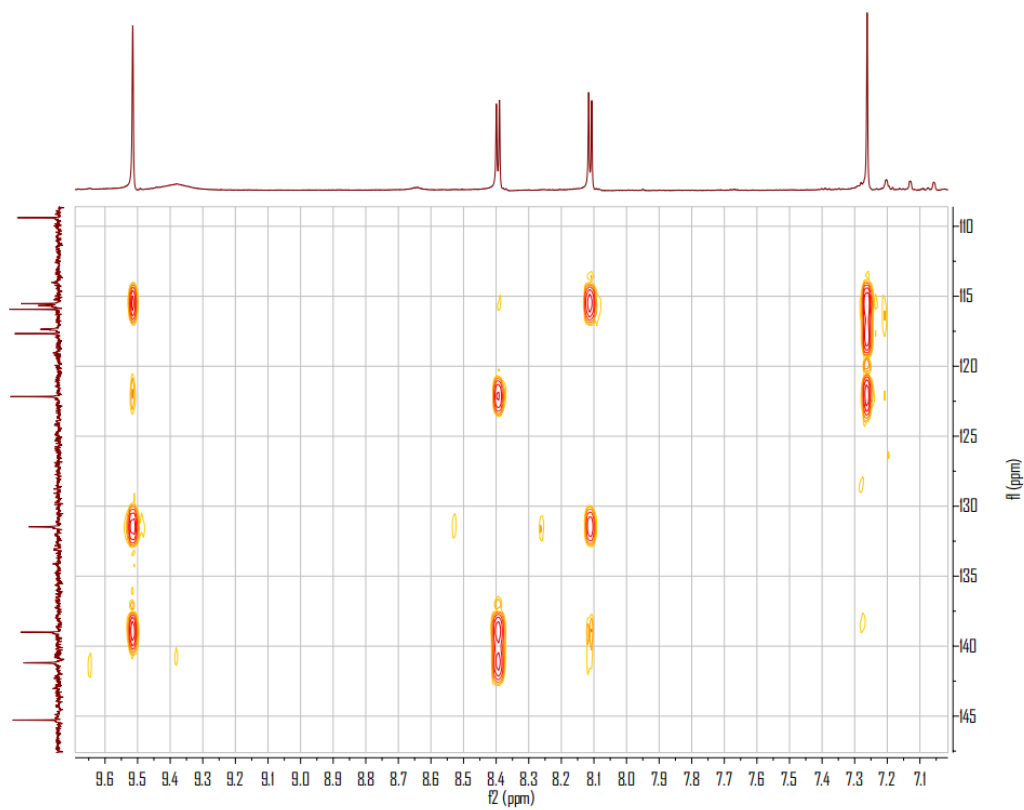

**Figure S73.** Partial HMBC spectrum of **9** in DMSO- $d_6$

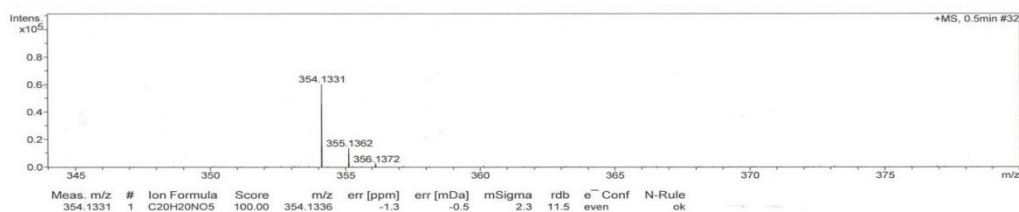

**Figure S74.** HRESIMS spectrum of **9**

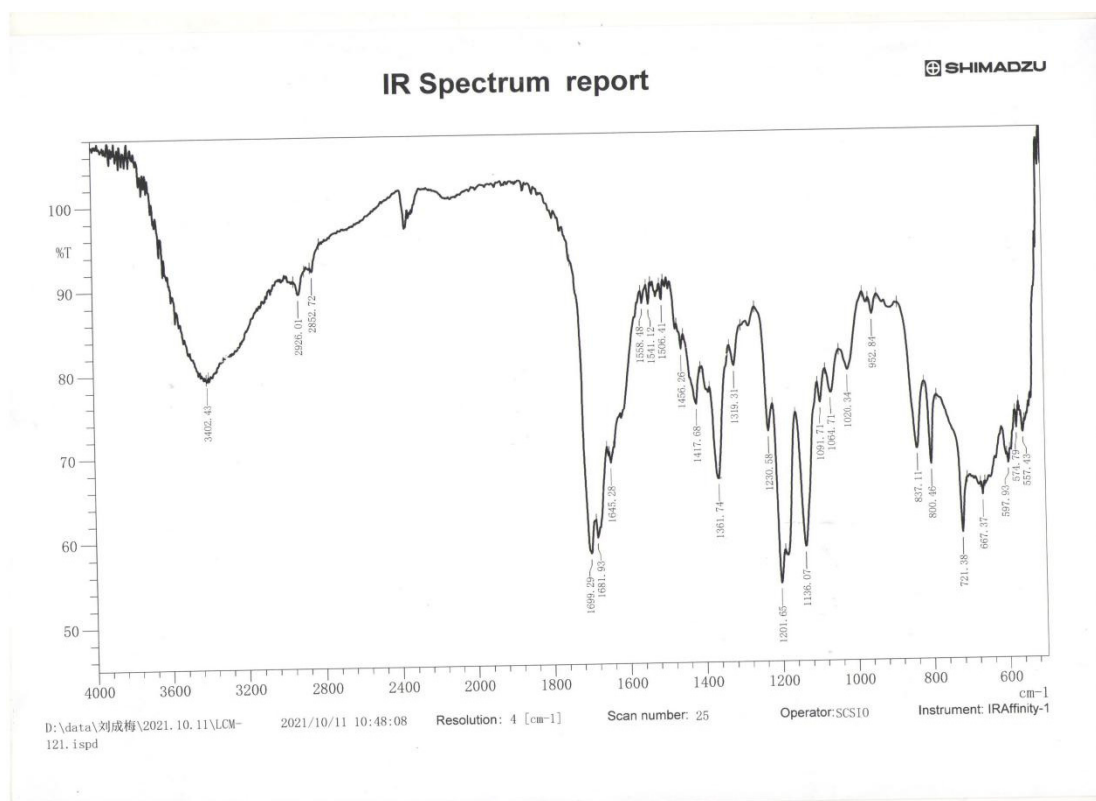

**Figure S75.** IR spectrum of **9**

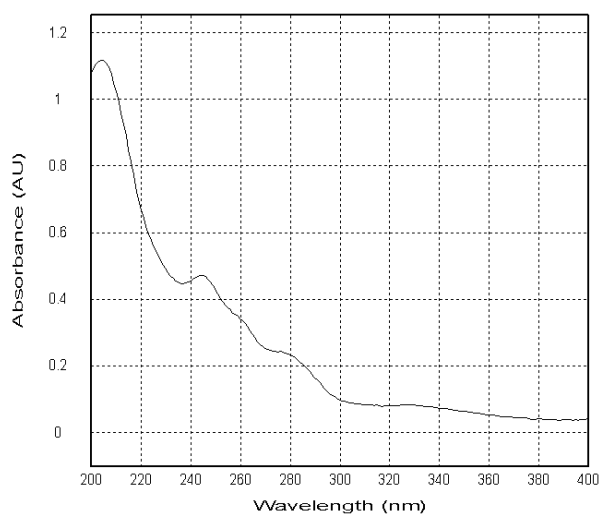

**Figure S76.** UV spectrum of **9**

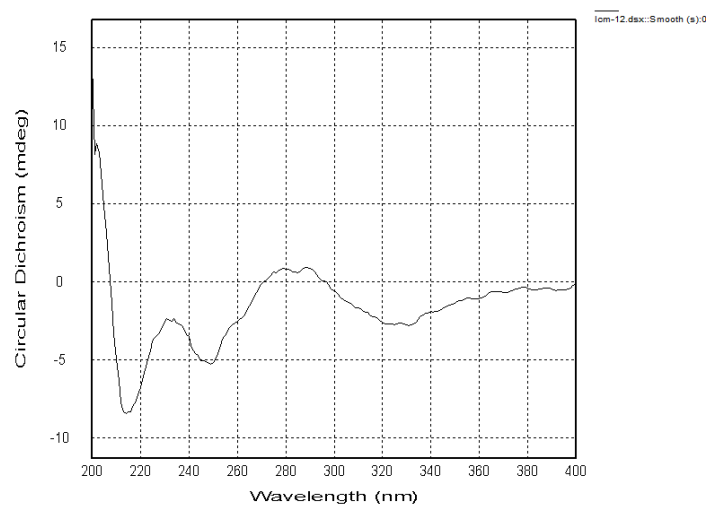

**Figure S77.** CD spectrum of **9** in methanol

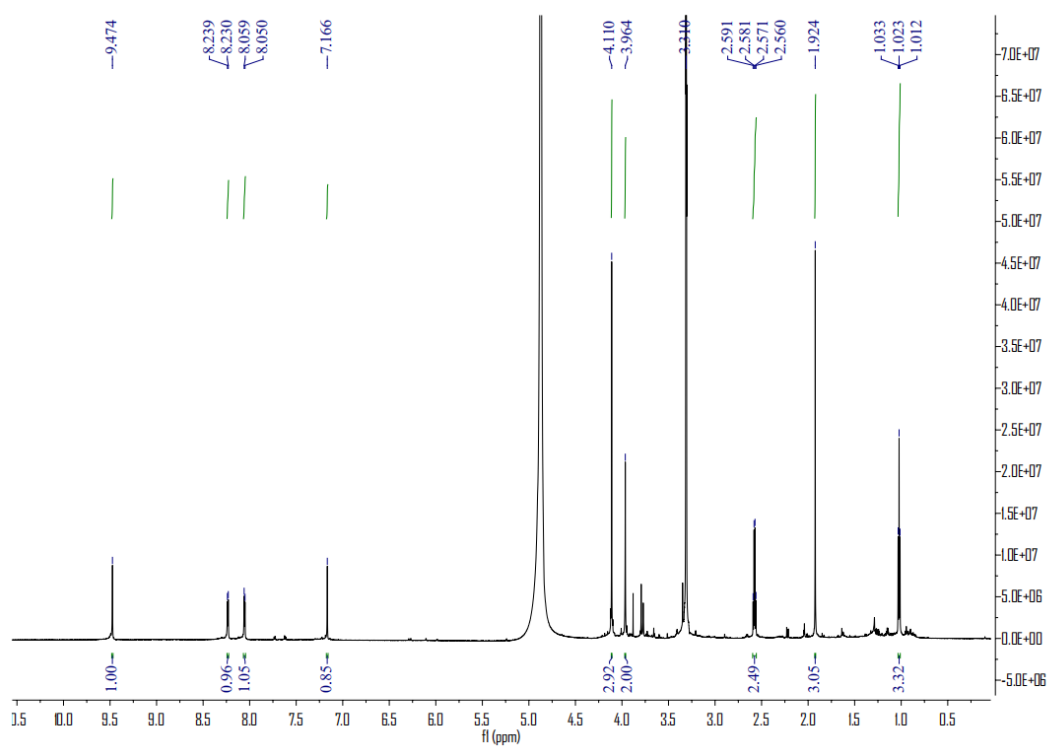

**Figure S78.**  $^1\text{H}$  NMR spectrum of **10** in methanol- $d_4$

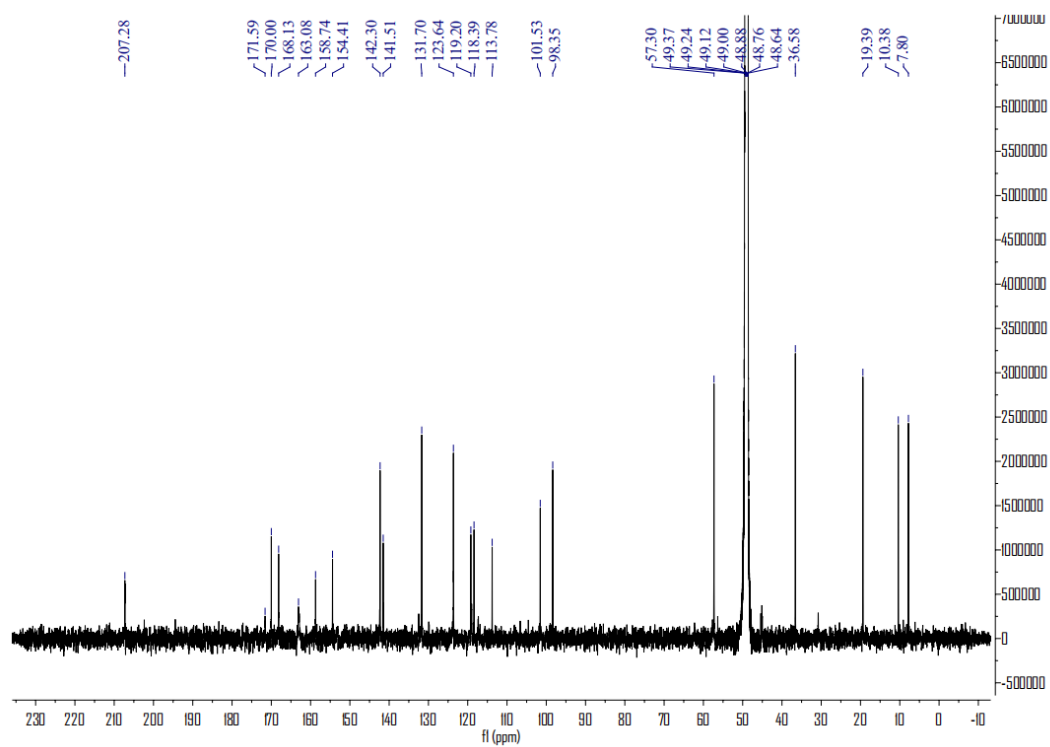

**Figure S79.**  $^{13}\text{C}$  NMR spectrum of **10** in methanol- $d_4$

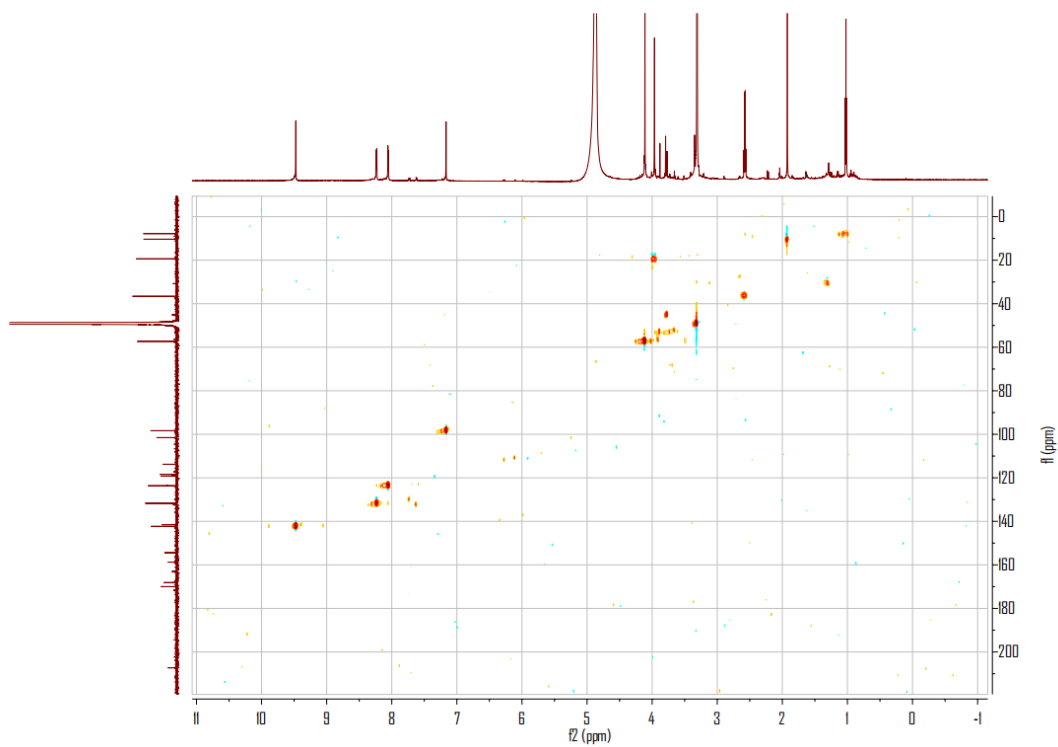

**Figure S80.** HSQC spectrum of **10** in methanol- $d_4$

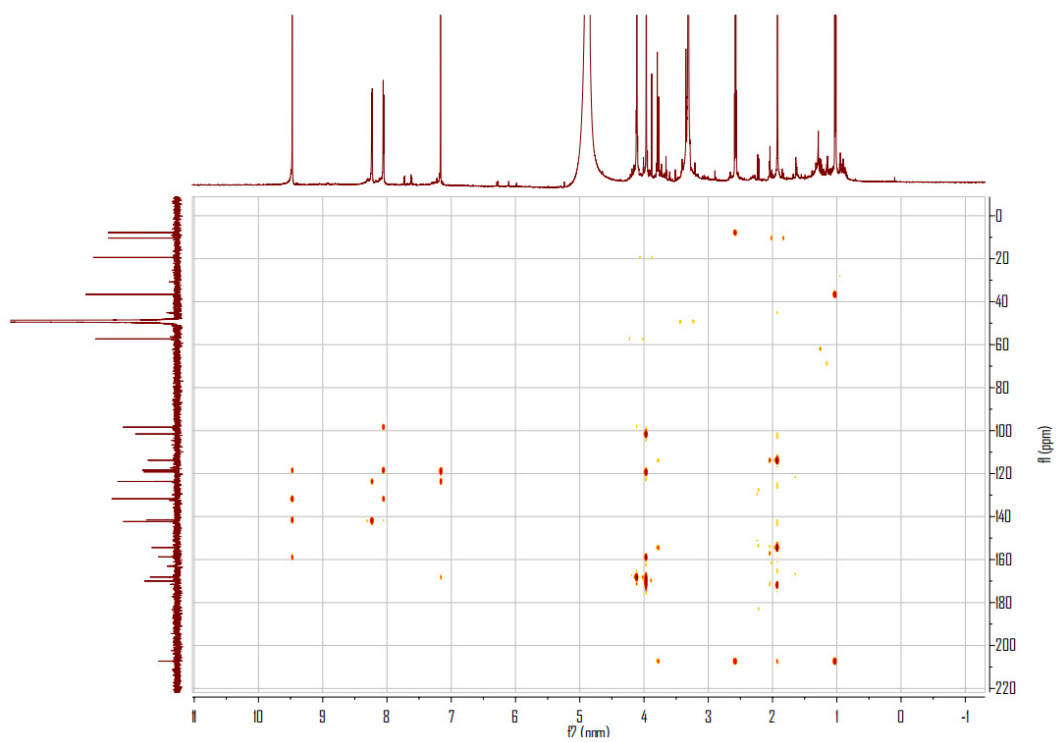

**Figure S81.** HMBC spectrum of **10** in methanol-*d*<sub>4</sub>

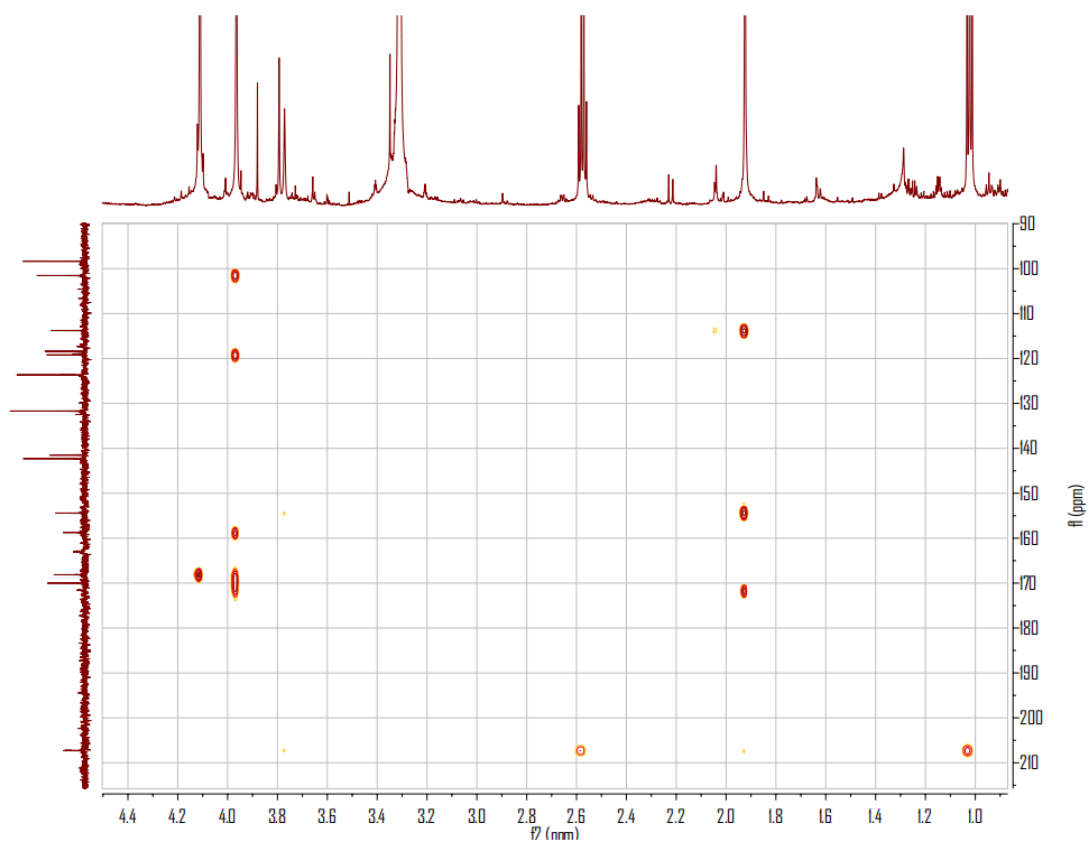

**Figure S82.** Partial HMBC spectrum of **10** in methanol-*d*<sub>4</sub>

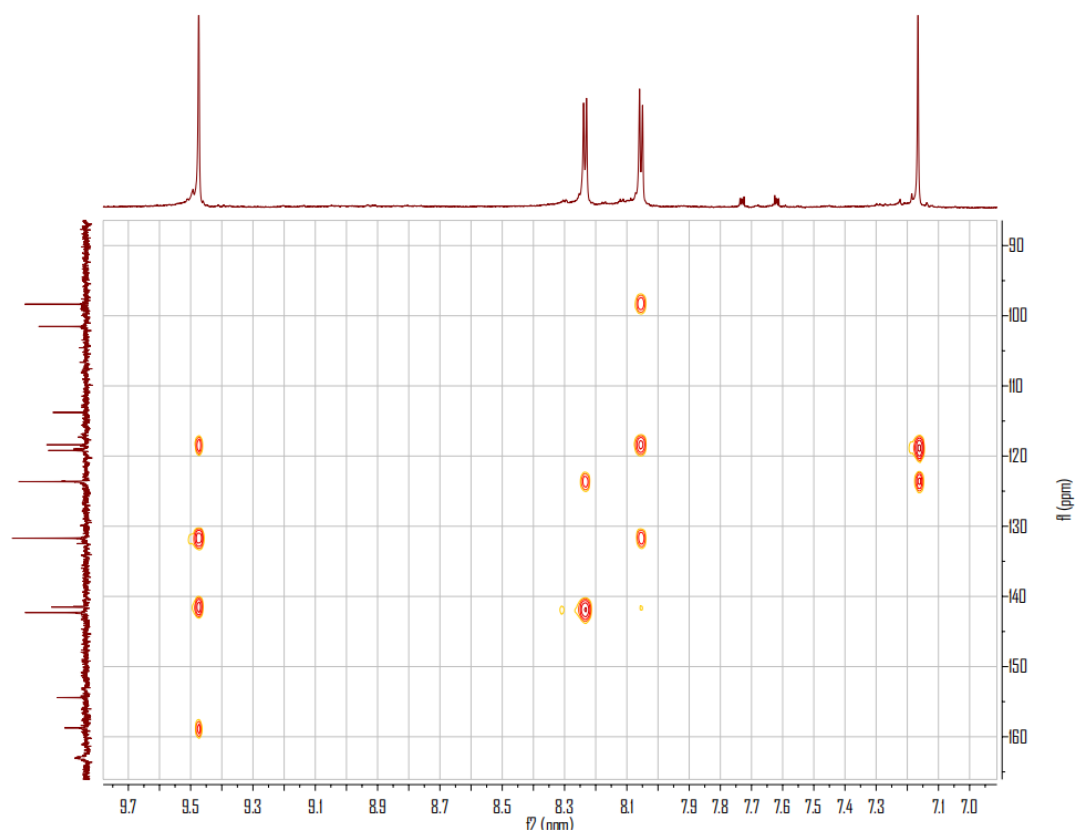

**Figure S83.** Partial HMBC spectrum of **10** in methanol-*d*<sub>4</sub>

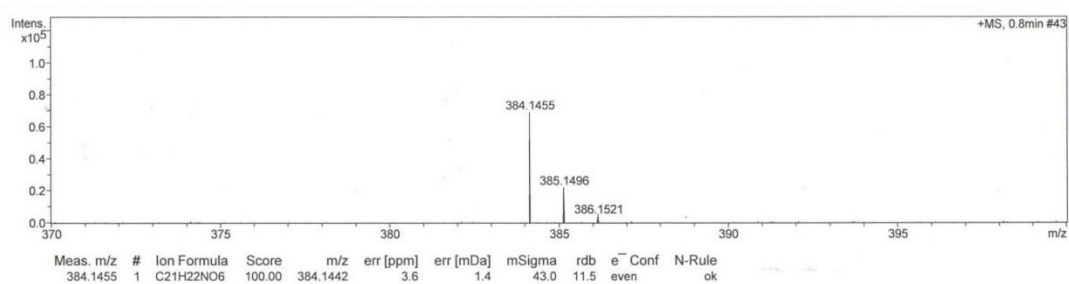

**Figure S84.** HRESIMS spectrum of **10**

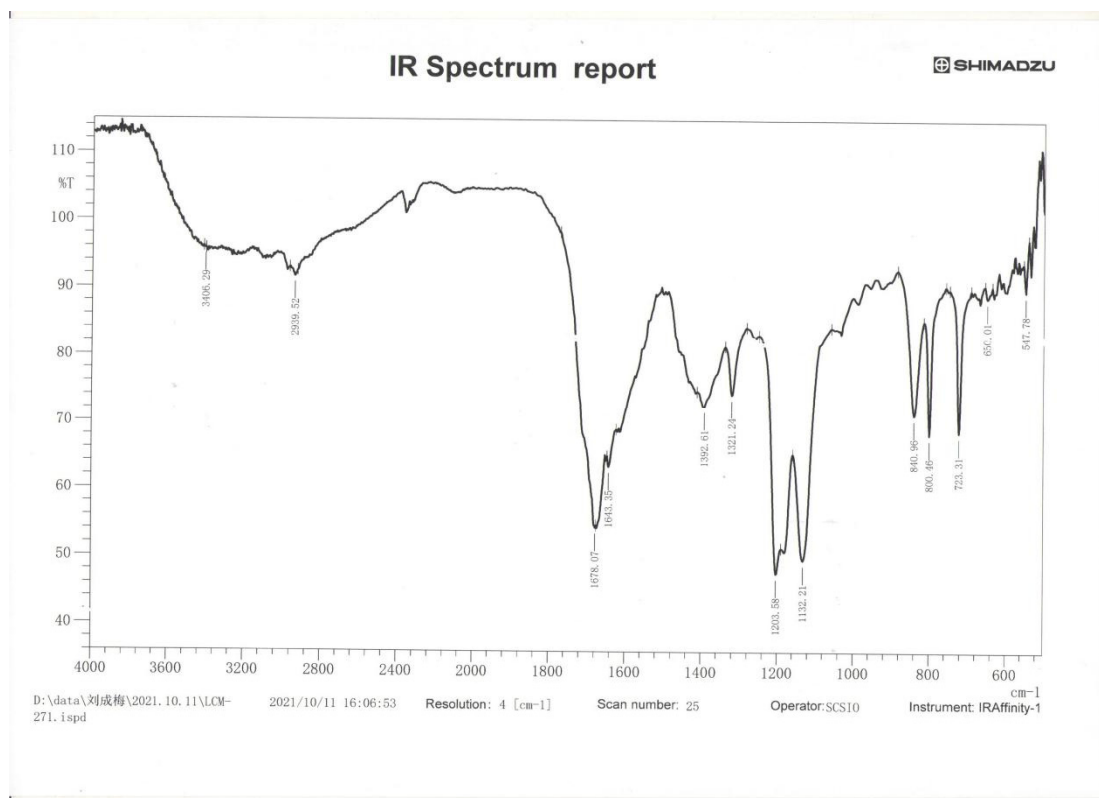

**Figure S85. IR spectrum of 10**

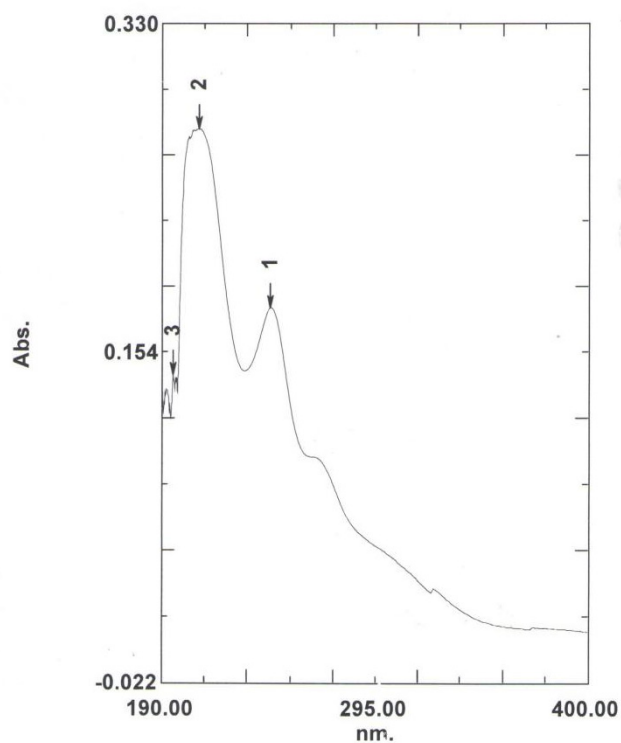

**Figure S86. UV spectrum of 10**



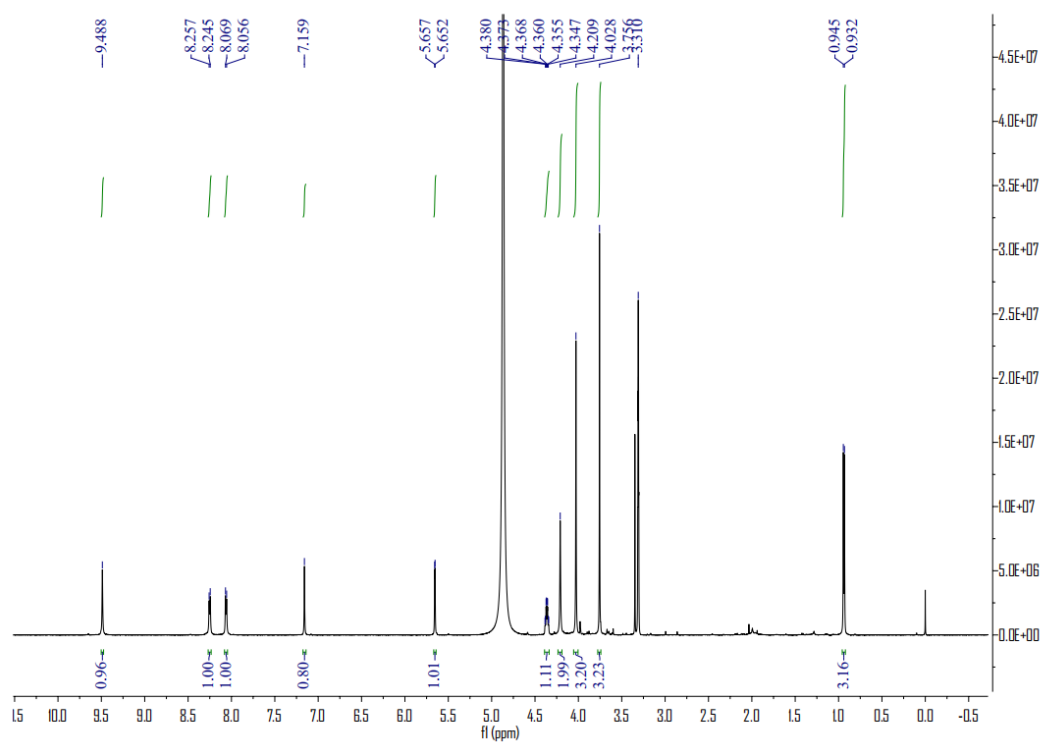

**Figure S87.** <sup>1</sup>H NMR spectrum of **11** in methanol-*d*<sub>4</sub>

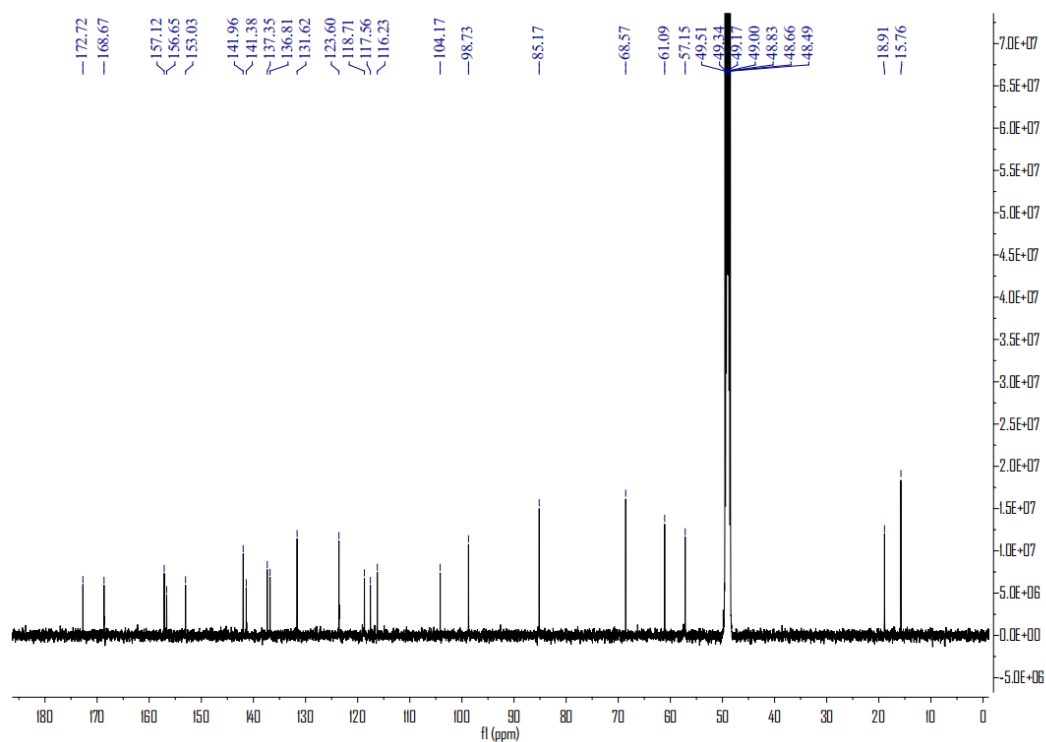

**Figure S88.** <sup>13</sup>C NMR spectrum of **11** in methanol-*d*<sub>4</sub>

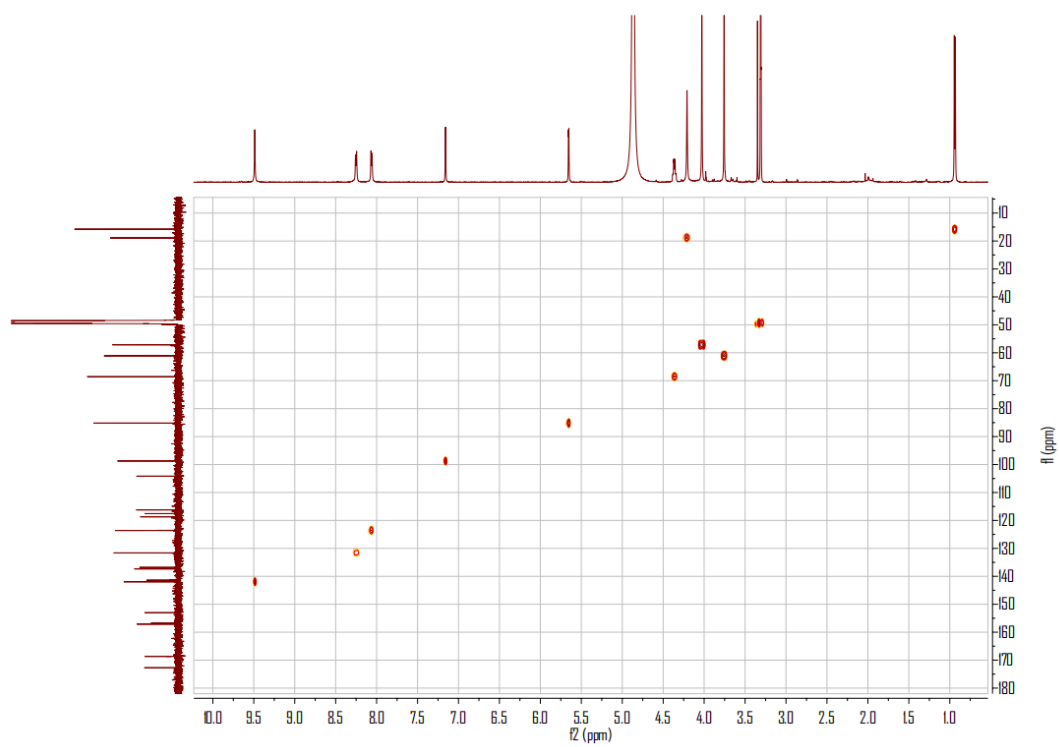

**Figure S89.** HSQC spectrum of **11** in methanol-*d*<sub>4</sub>

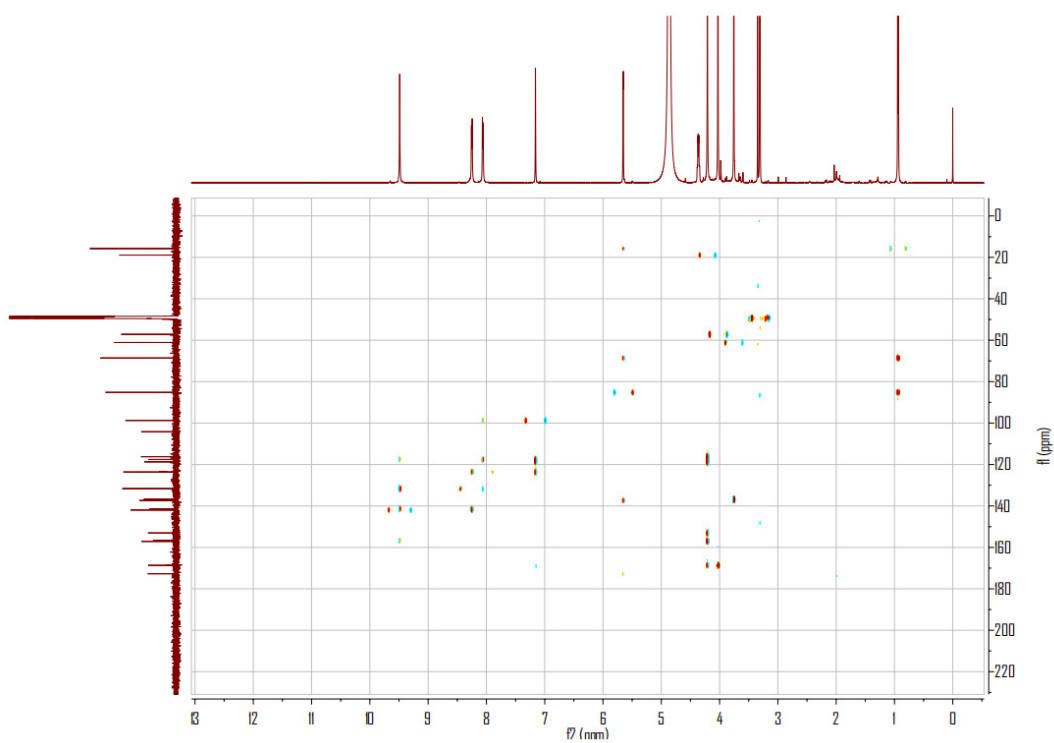

**Figure S90.** HMBC spectrum of **11** in methanol-*d*<sub>4</sub>

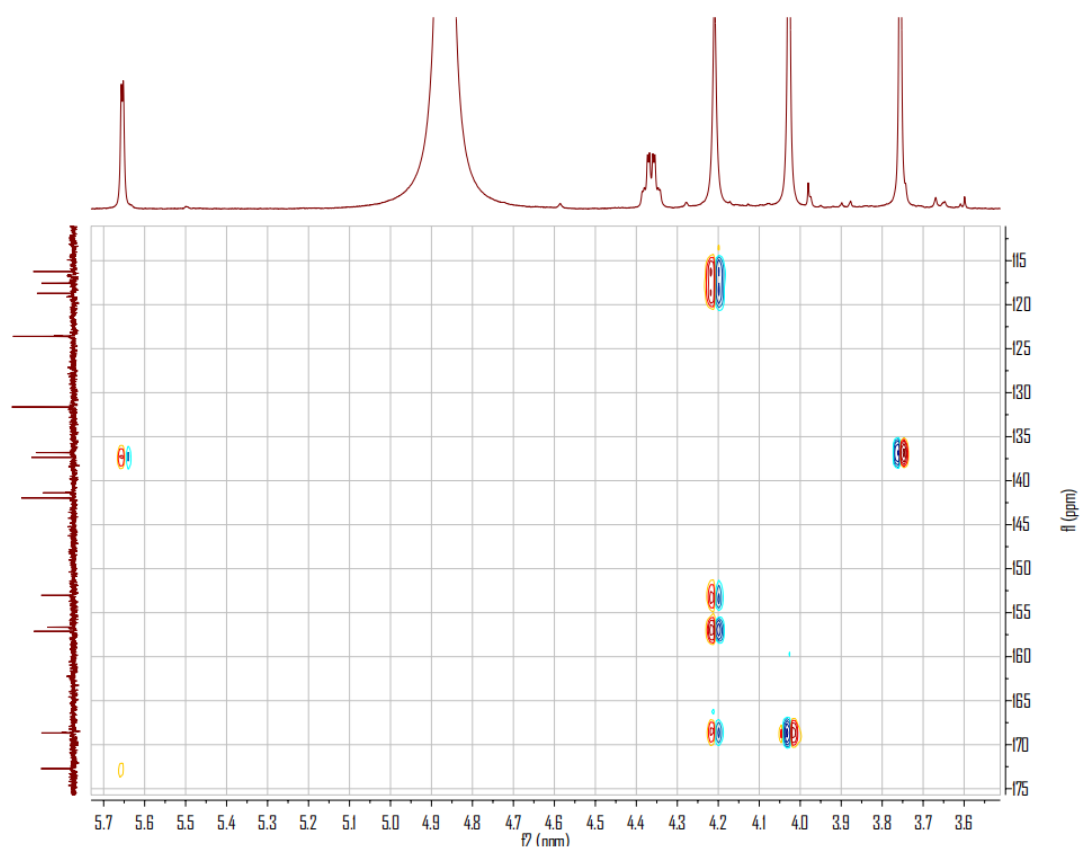

**Figure S91.** Partial HMBC spectrum of **11** in methanol-*d*<sub>4</sub>

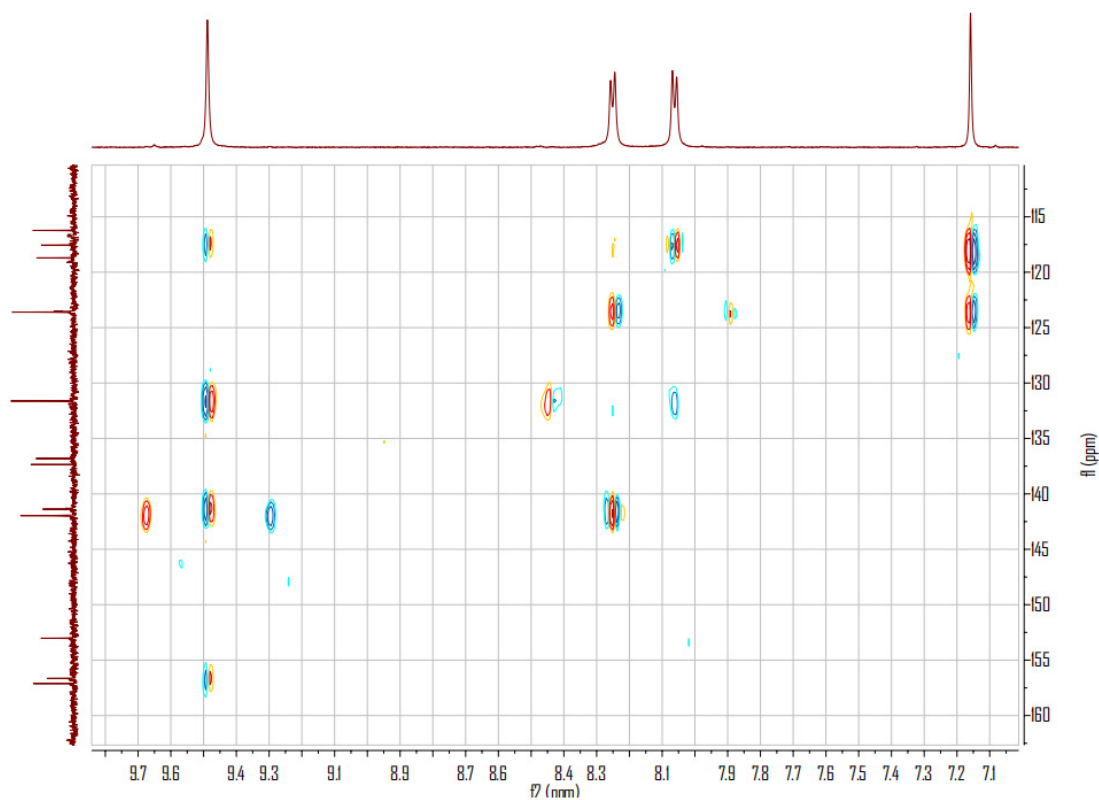

**Figure S92.** Partial HMBC spectrum of **11** in methanol-*d*<sub>4</sub>

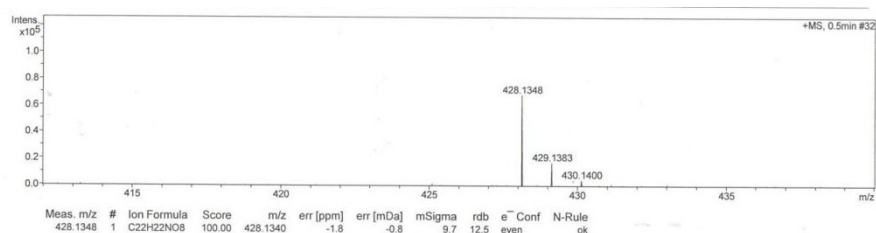

**Figure S93.** HRESIMS spectrum of **11**

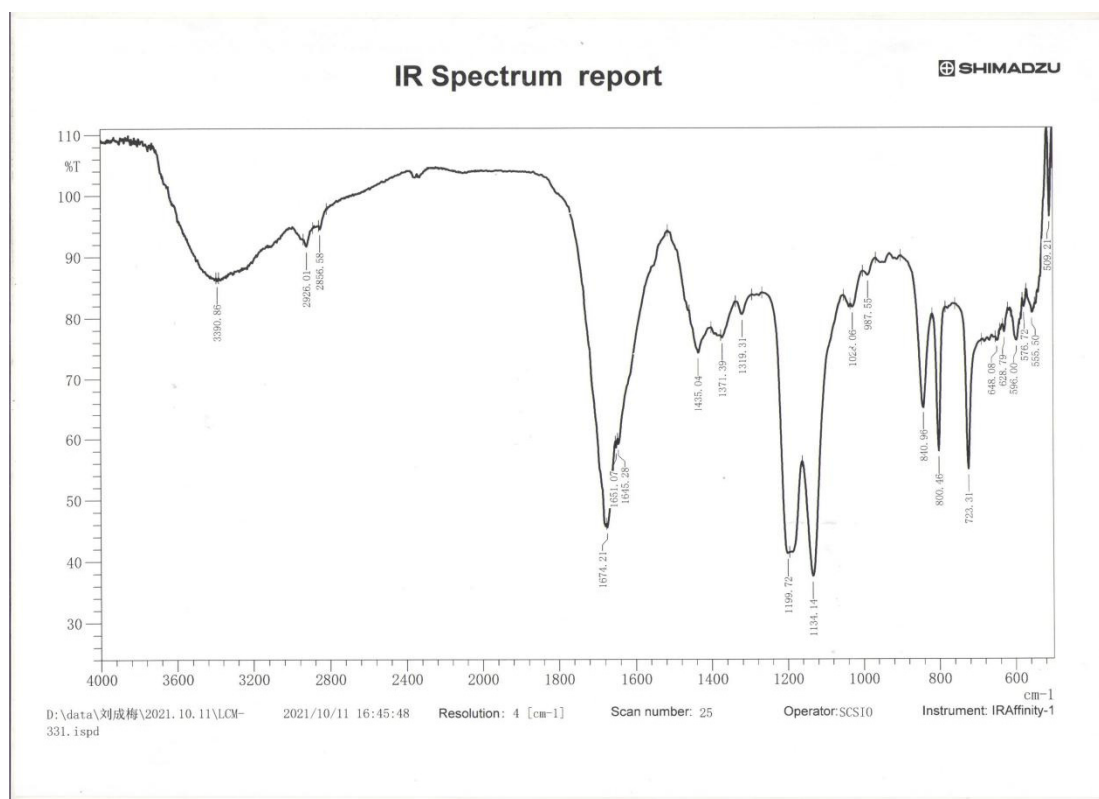

**Figure S94.** IR spectrum of **11**

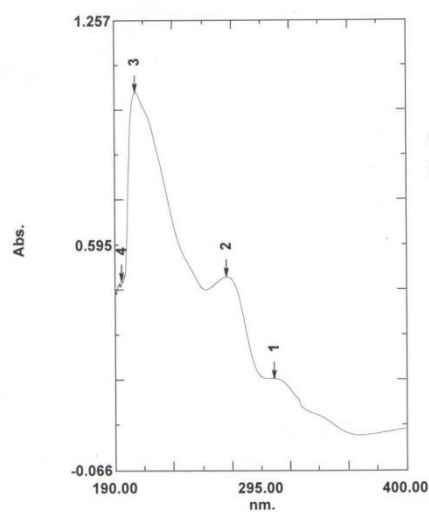

**Figure S95.** UV spectrum of **11**

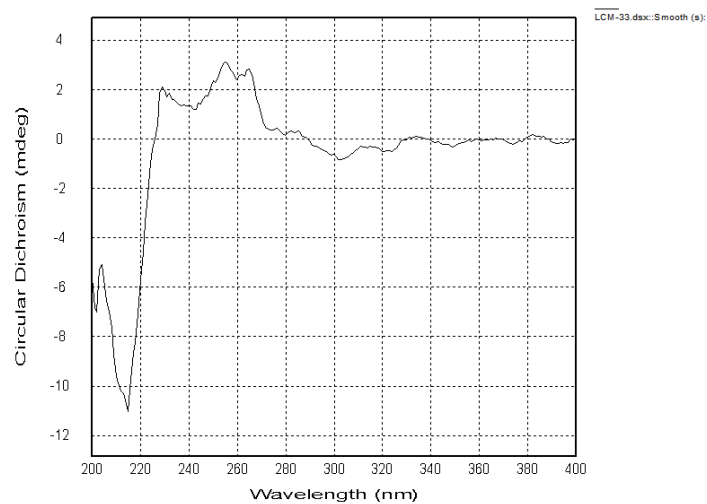

**Figure S96.** CD spectrum of **11** in methanol

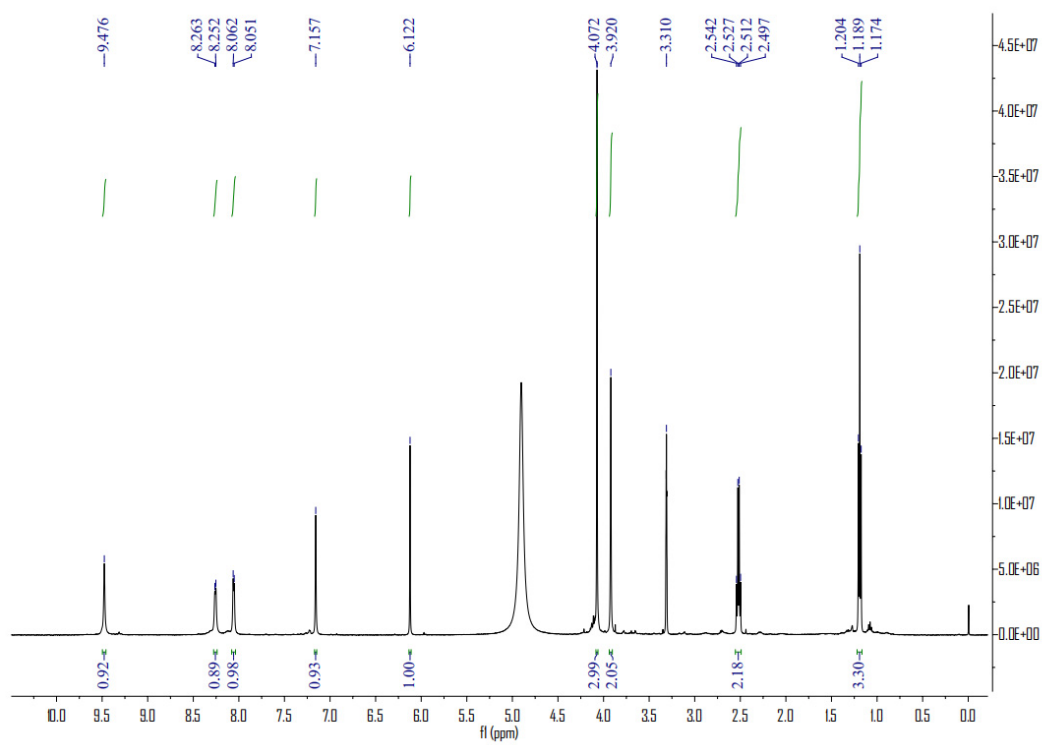

**Figure S97.**  $^1\text{H}$  NMR spectrum of **12** in methanol- $d_4$

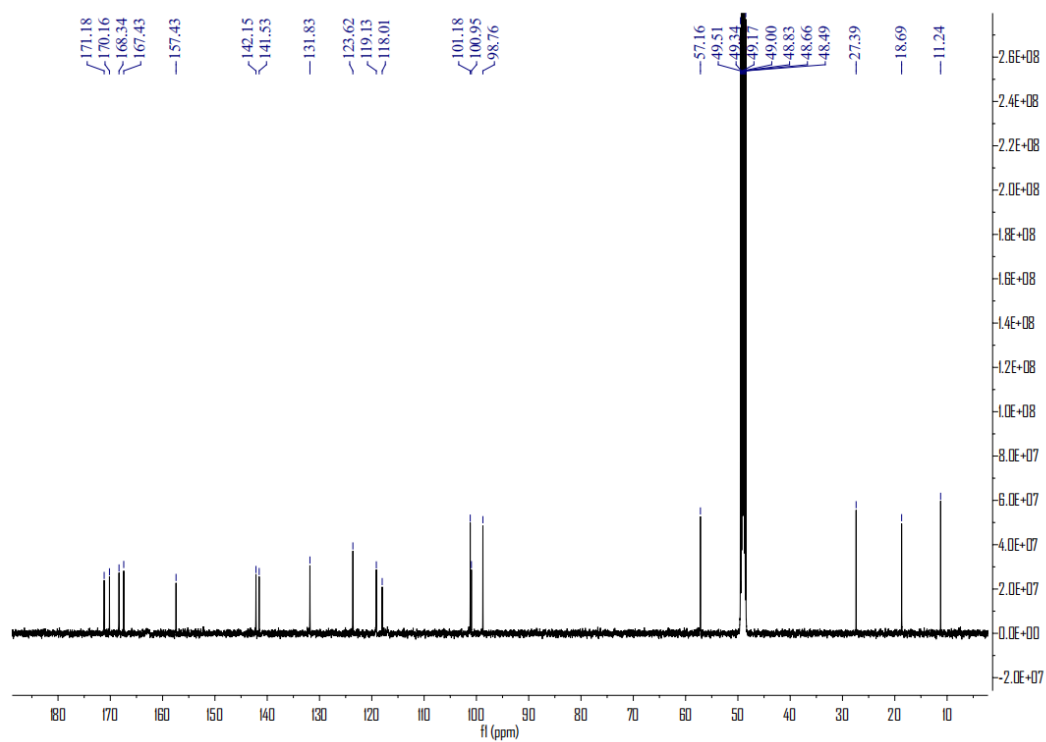

**Figure S98.** <sup>13</sup>C NMR spectrum of **12** in methanol-*d*<sub>4</sub>

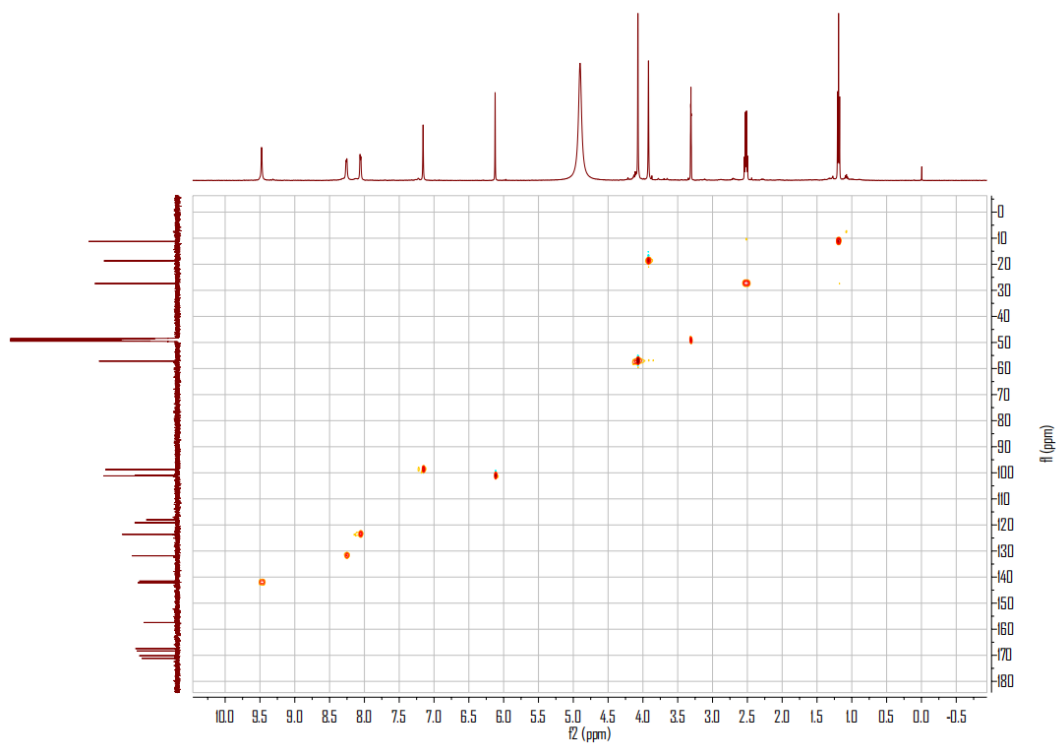

**Figure S99.** HSQC spectrum of **12** in methanol-*d*<sub>4</sub>

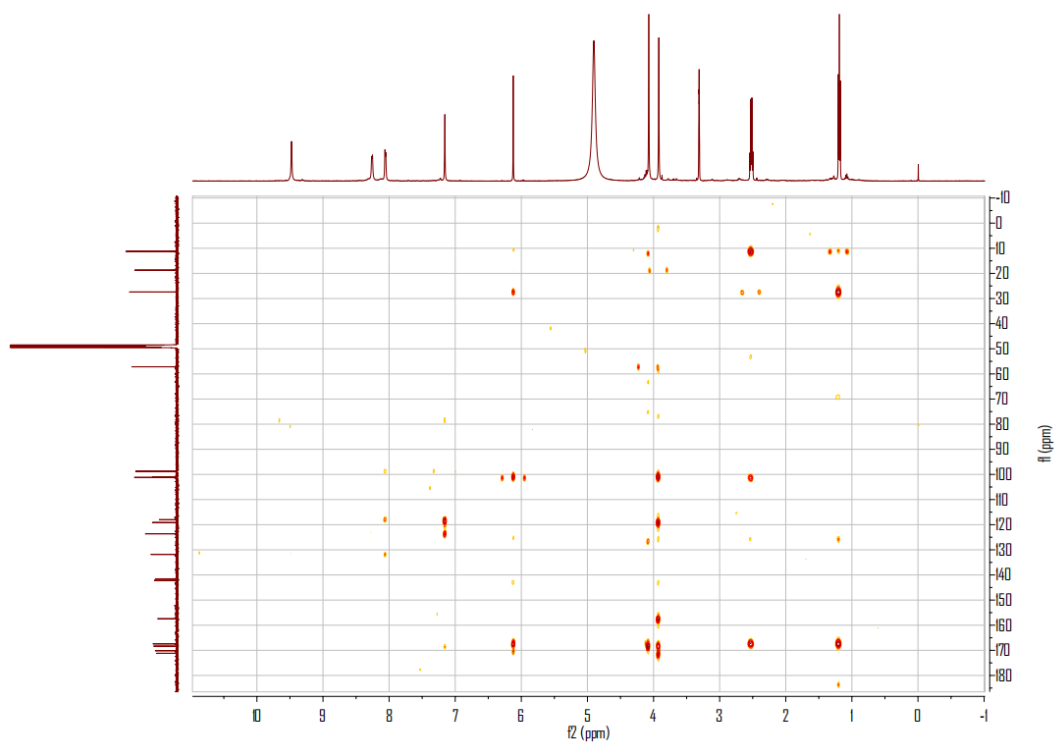

**Figure S100.** HMBC spectrum of **12** in methanol-*d*<sub>4</sub>

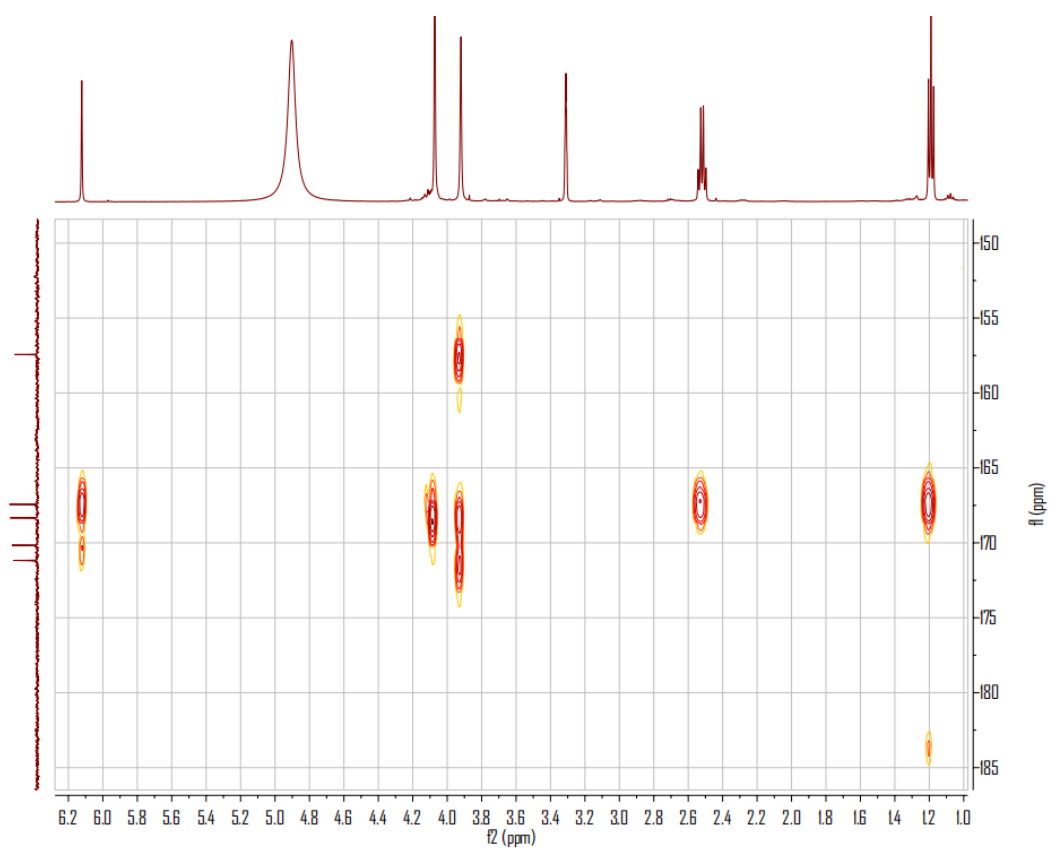

**Figure S101.** Partial HMBC spectrum of **12** in methanol-*d*<sub>4</sub>

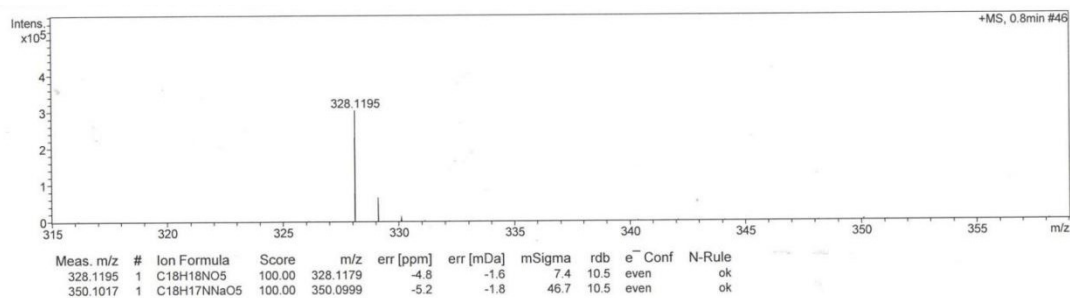

**Figure S102.** HRESIMS spectrum of **12**

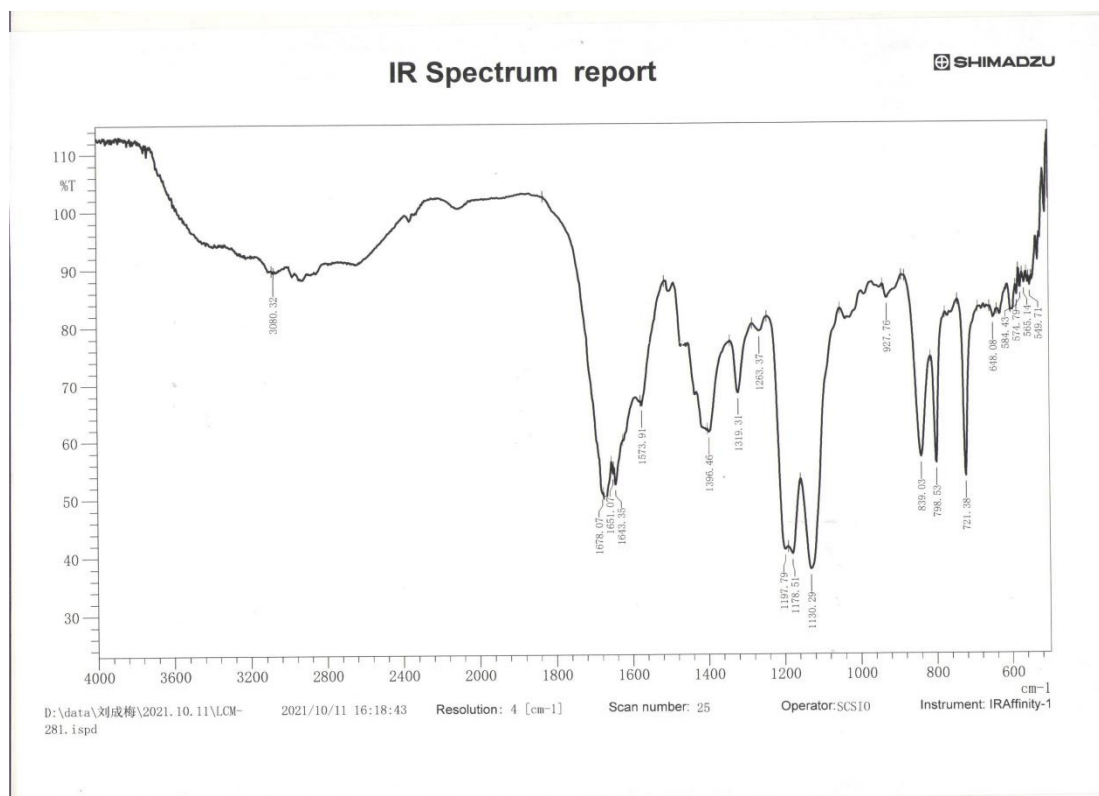

**Figure S103.** IR spectrum of **12**



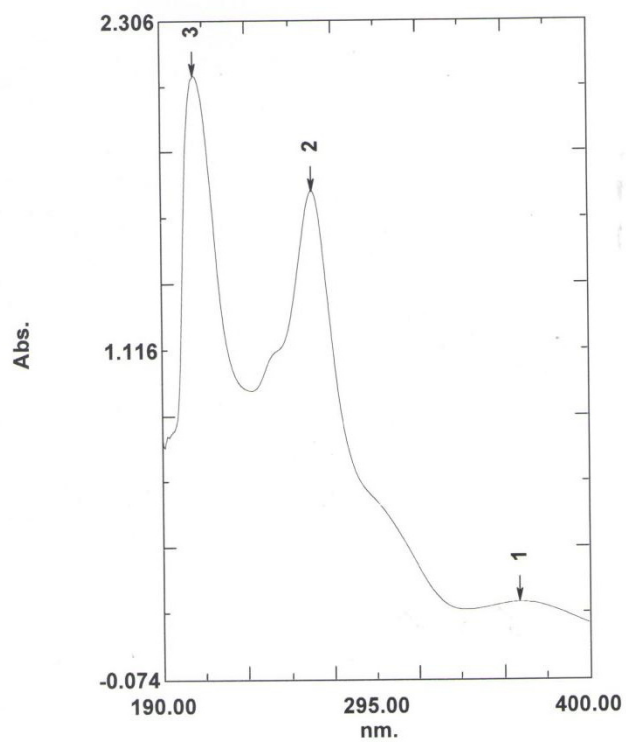

**Figure S104.** UV spectrum of **12**

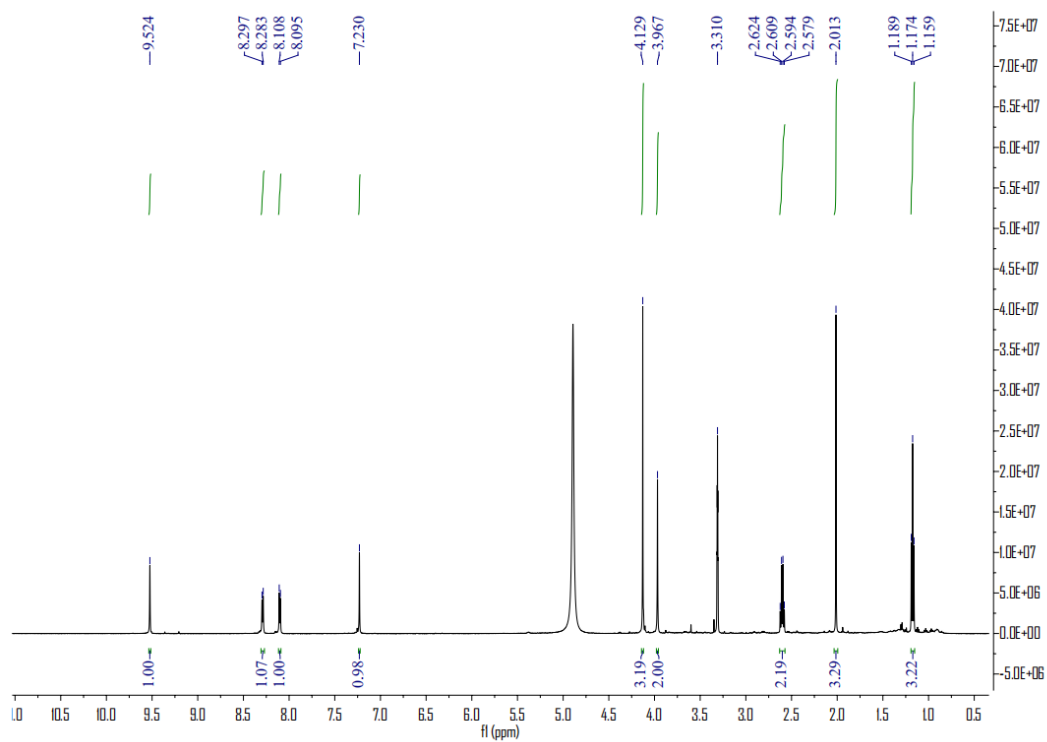

**Figure S105.** <sup>1</sup>H NMR spectrum of **13** in methanol-*d*<sub>4</sub>

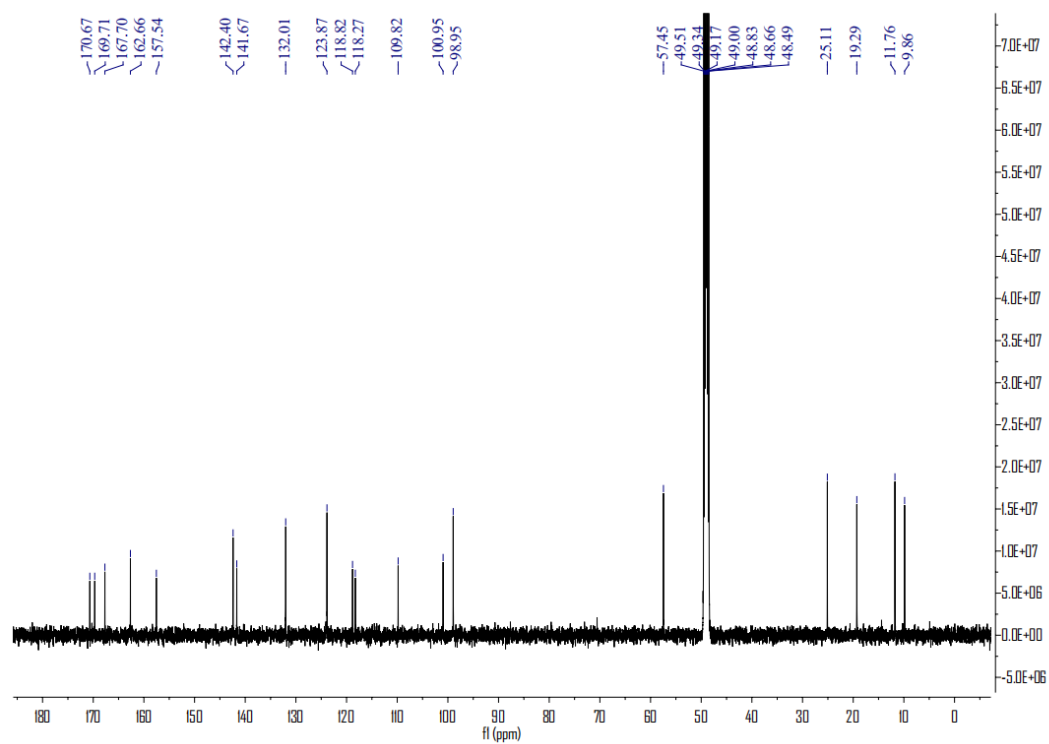

**Figure S106.**  $^{13}\text{C}$  NMR spectrum of **13** in methanol- $d_4$

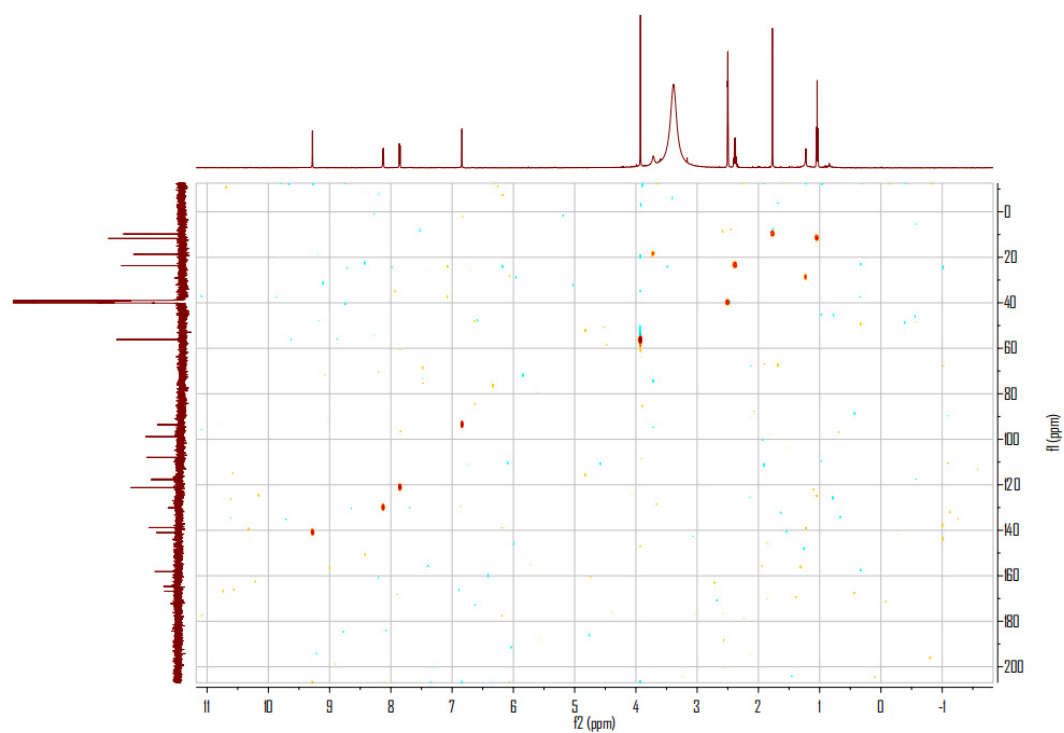

**Figure S107.** HSQC spectrum of **13** in DMSO- $d_6$

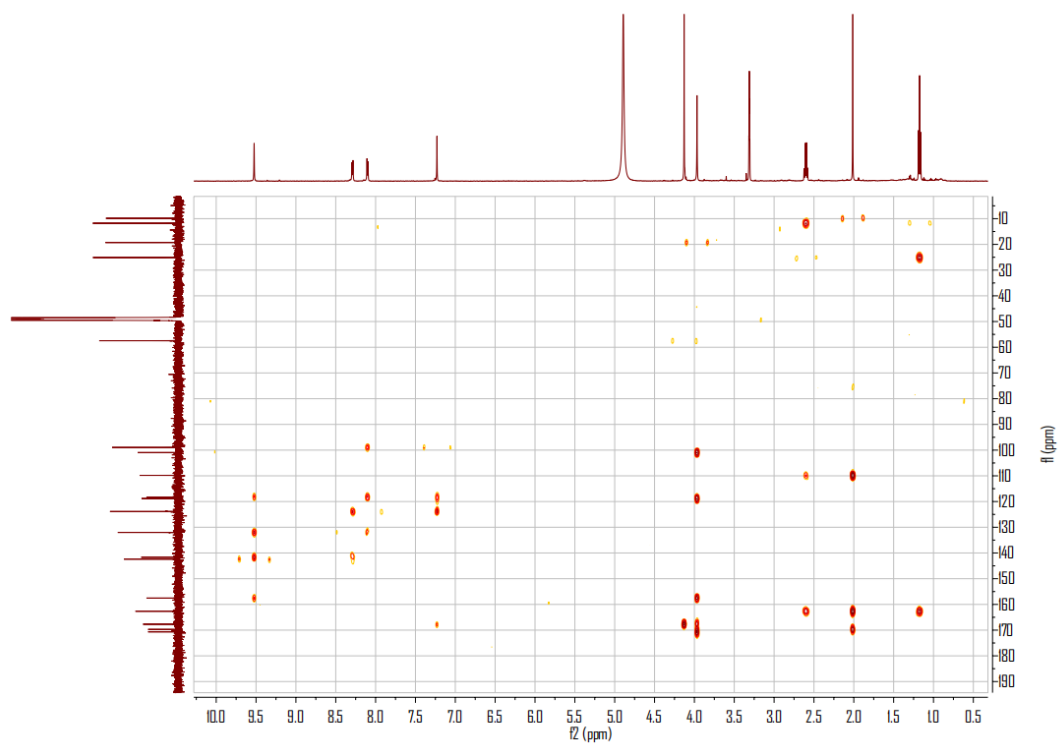

**Figure S108.** HMBC spectrum of **13** in methanol-*d*<sub>4</sub>

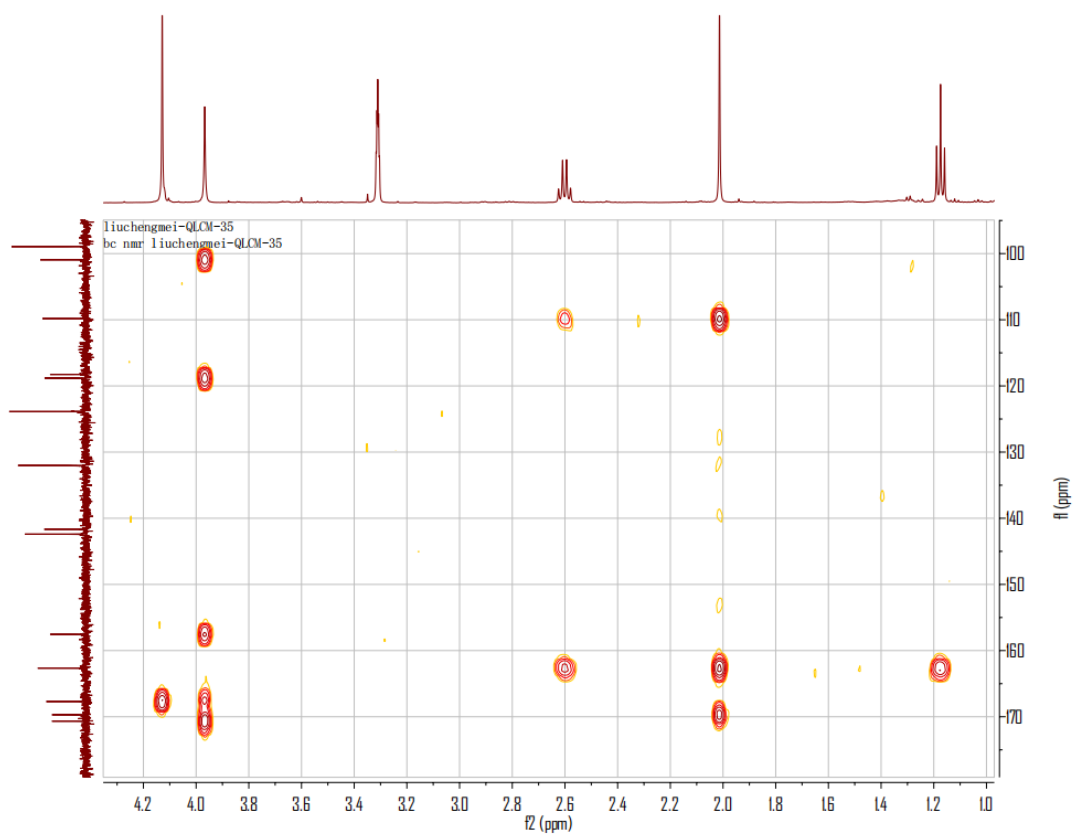

**Figure S109.** Partial HMBC spectrum of **13** in methanol-*d*<sub>4</sub>

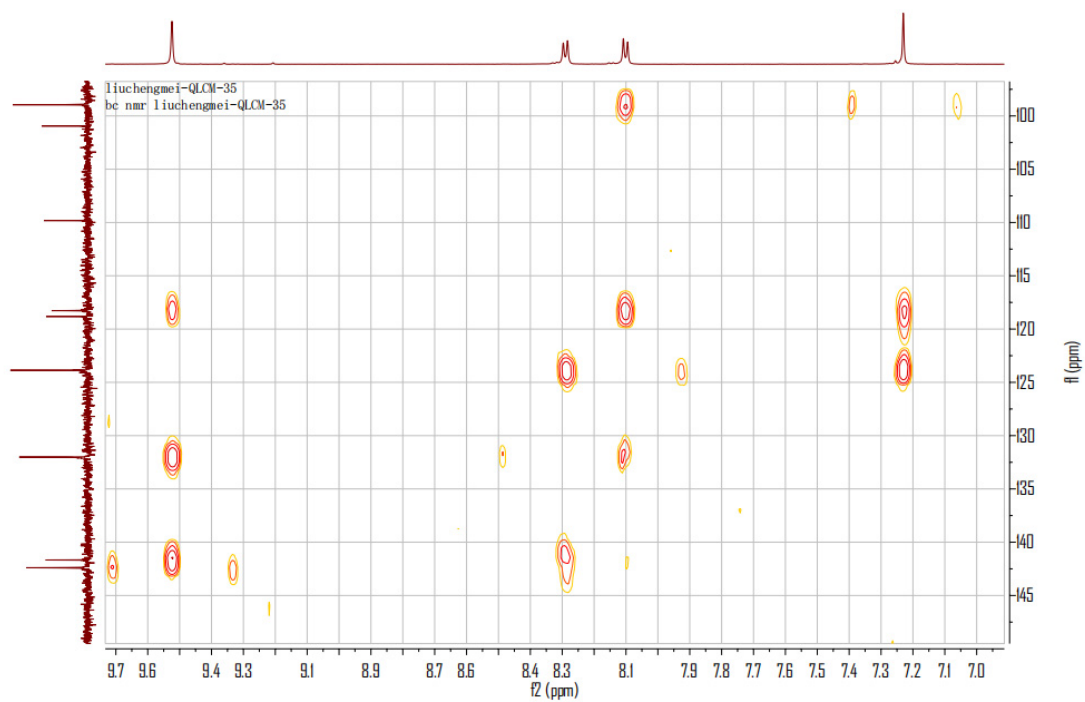

**Figure S110.** Partial HMBC spectrum of **13** in methanol- $d_4$

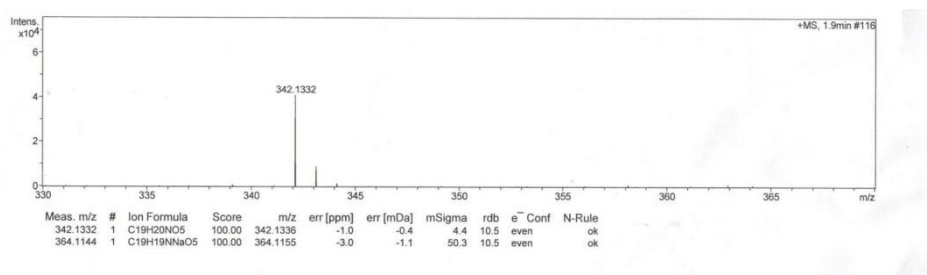

**Figure S111.** HRESIMS spectrum of **13**

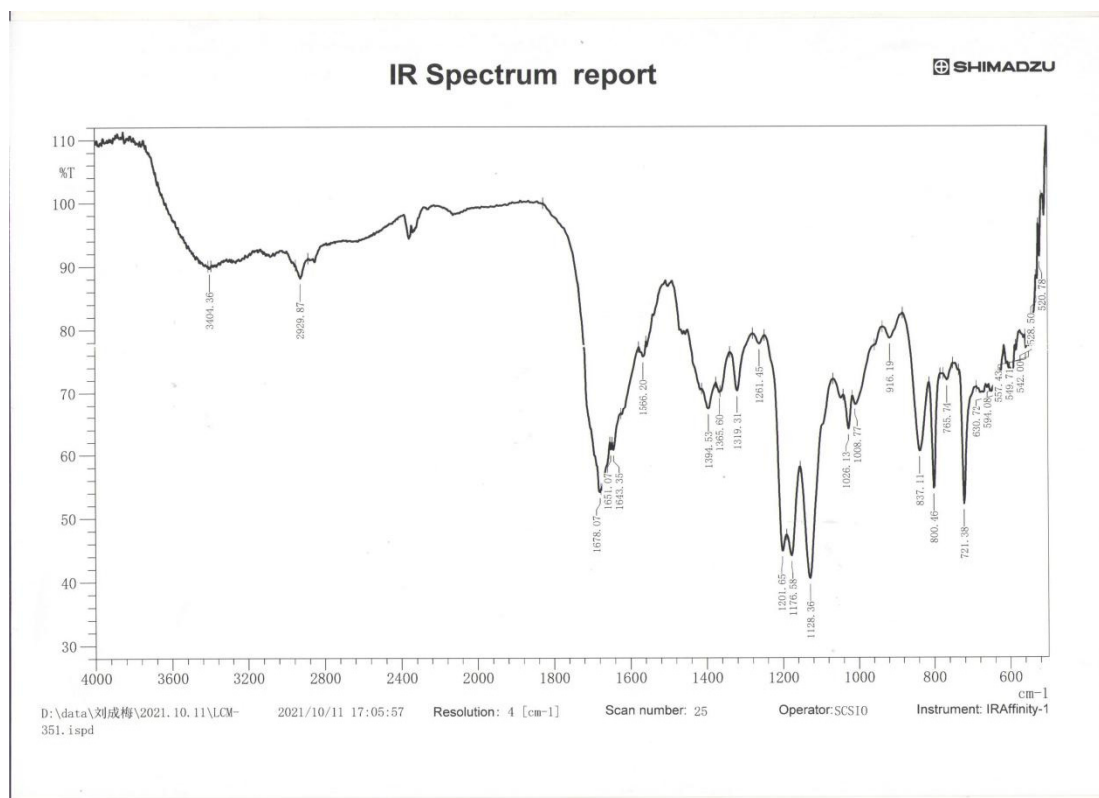

**Figure S112.** IR spectrum of **13**

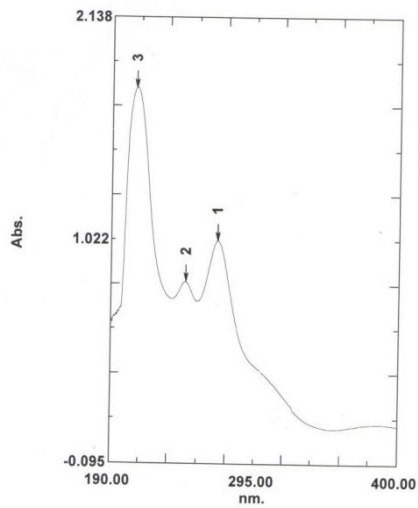

**Figure S113.** UV spectrum of **13**.

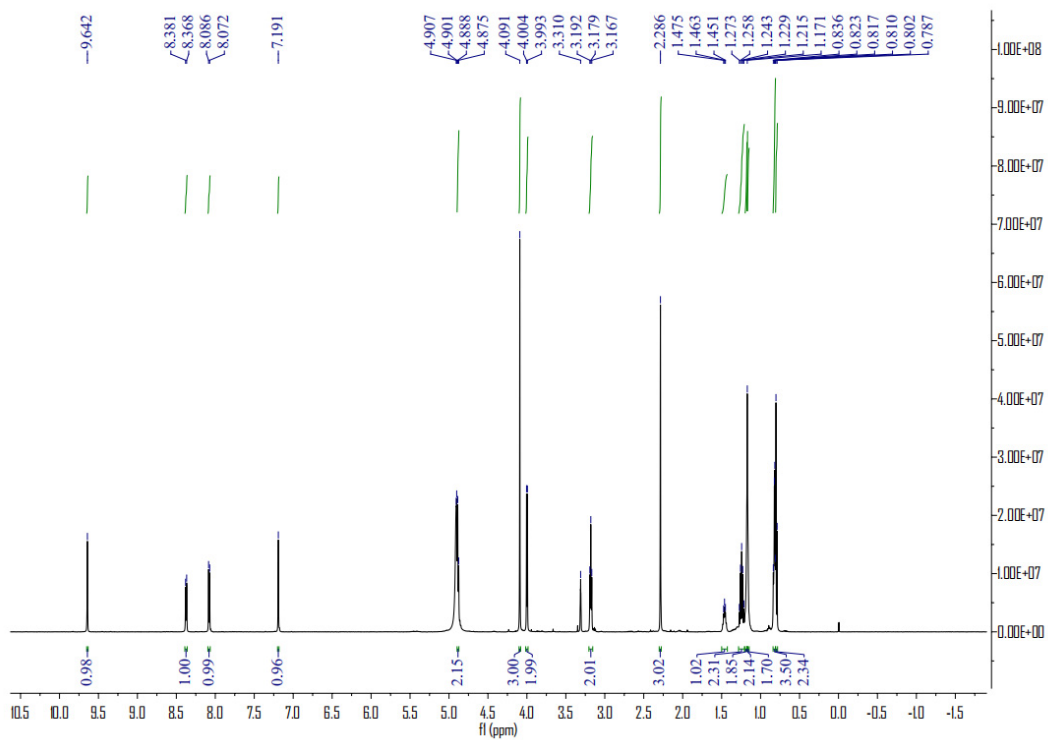

**Figure S114.** <sup>1</sup>H NMR spectrum of **14** in methanol-*d*<sub>4</sub>

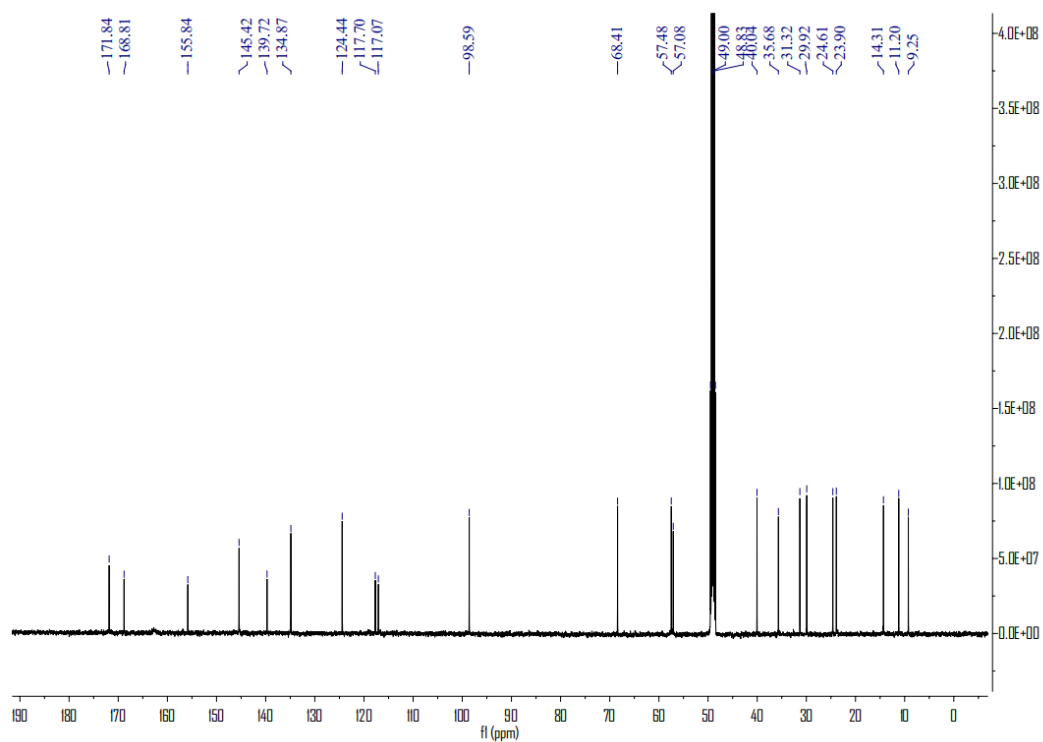

**Figure S115.** <sup>13</sup>C NMR spectrum of **14** in methanol-*d*<sub>4</sub>

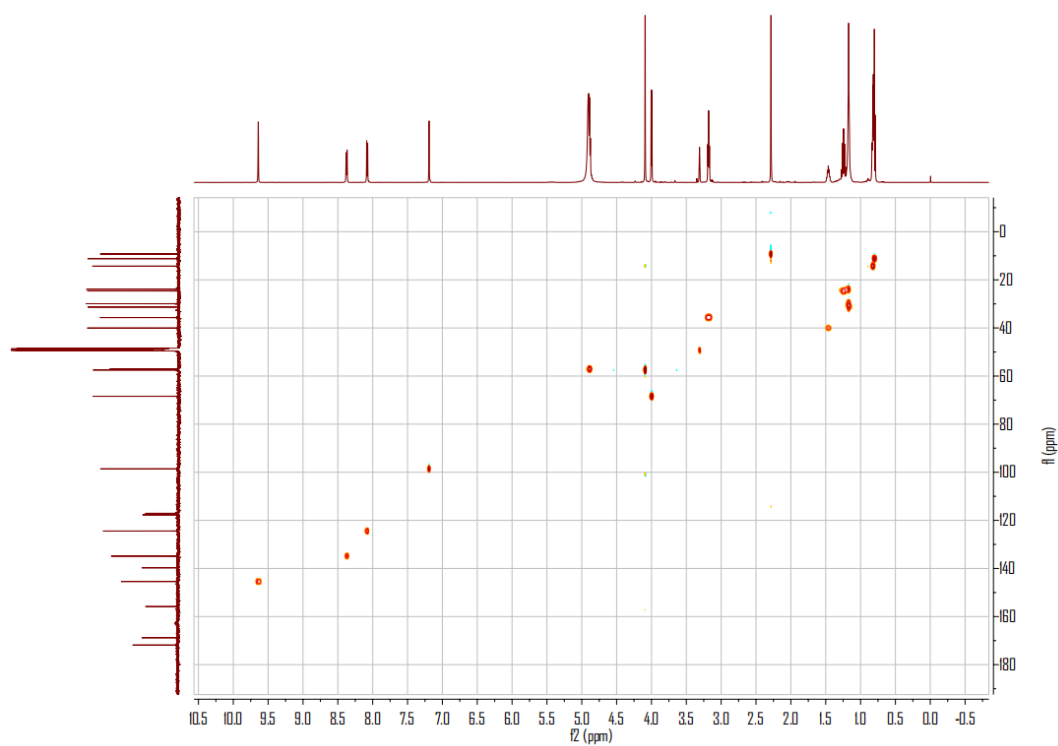

**Figure S116.** HSQC spectrum of **14** in methanol-*d*<sub>4</sub>

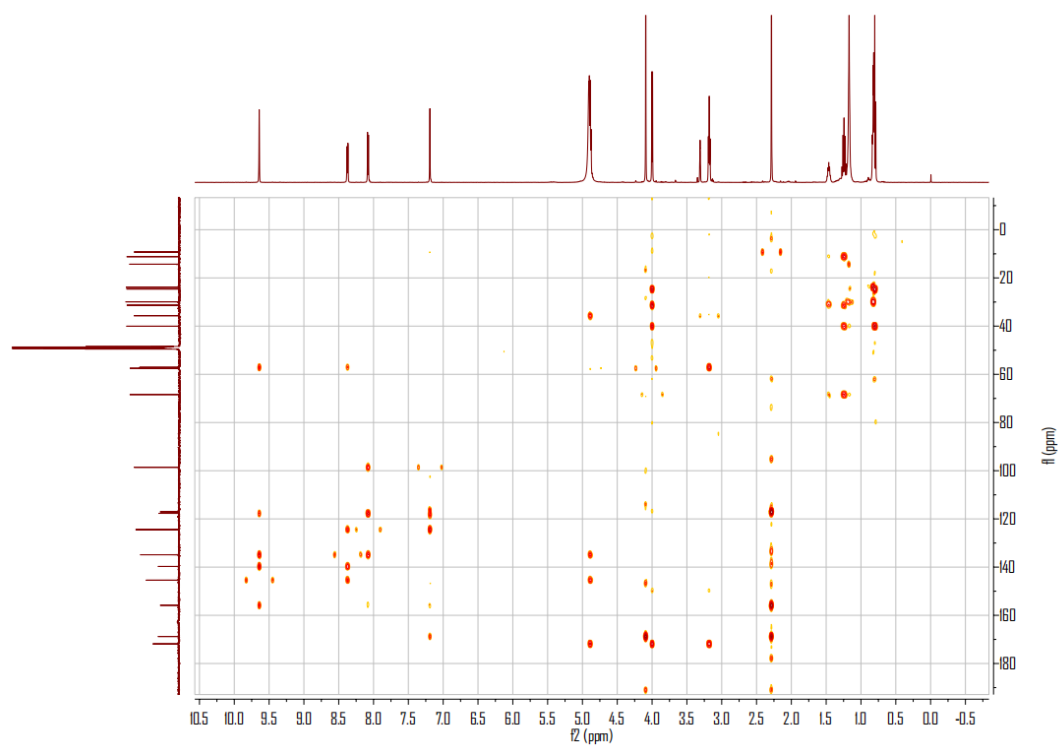

**Figure S117.** HMBC spectrum of **14** in methanol-*d*<sub>4</sub>

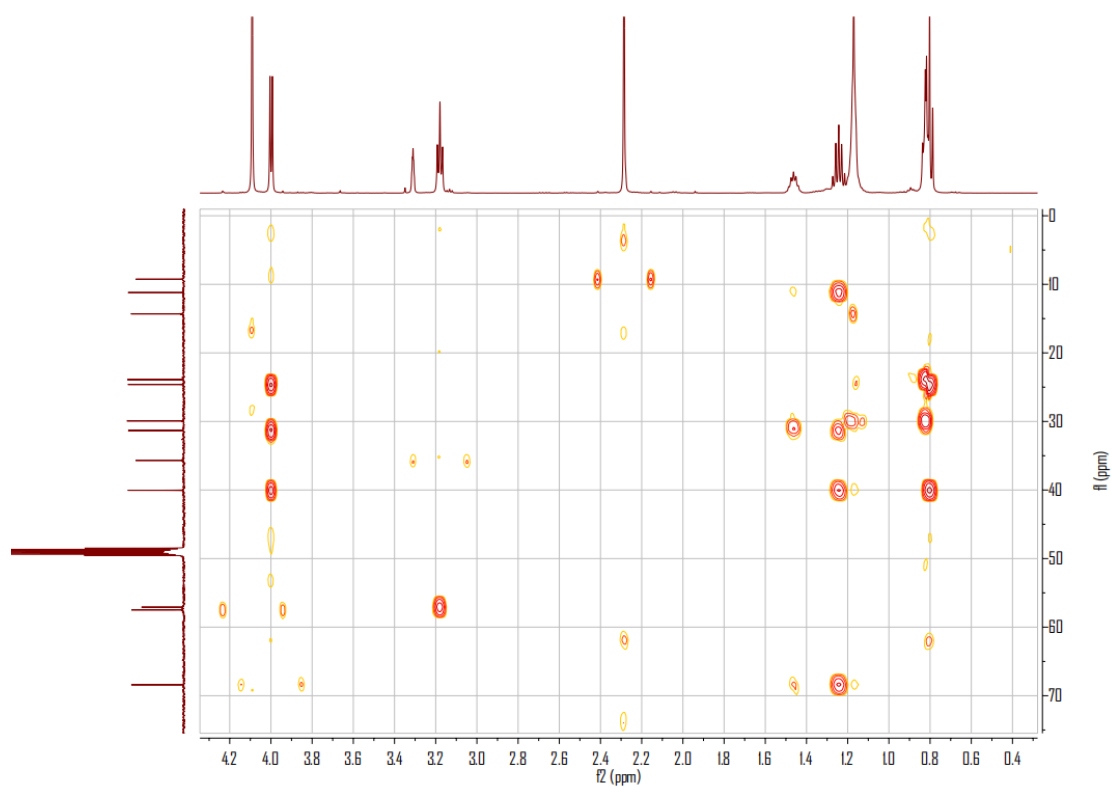

**Figure S118.** Partial HMBC spectrum of **14** in methanol-*d*<sub>4</sub>

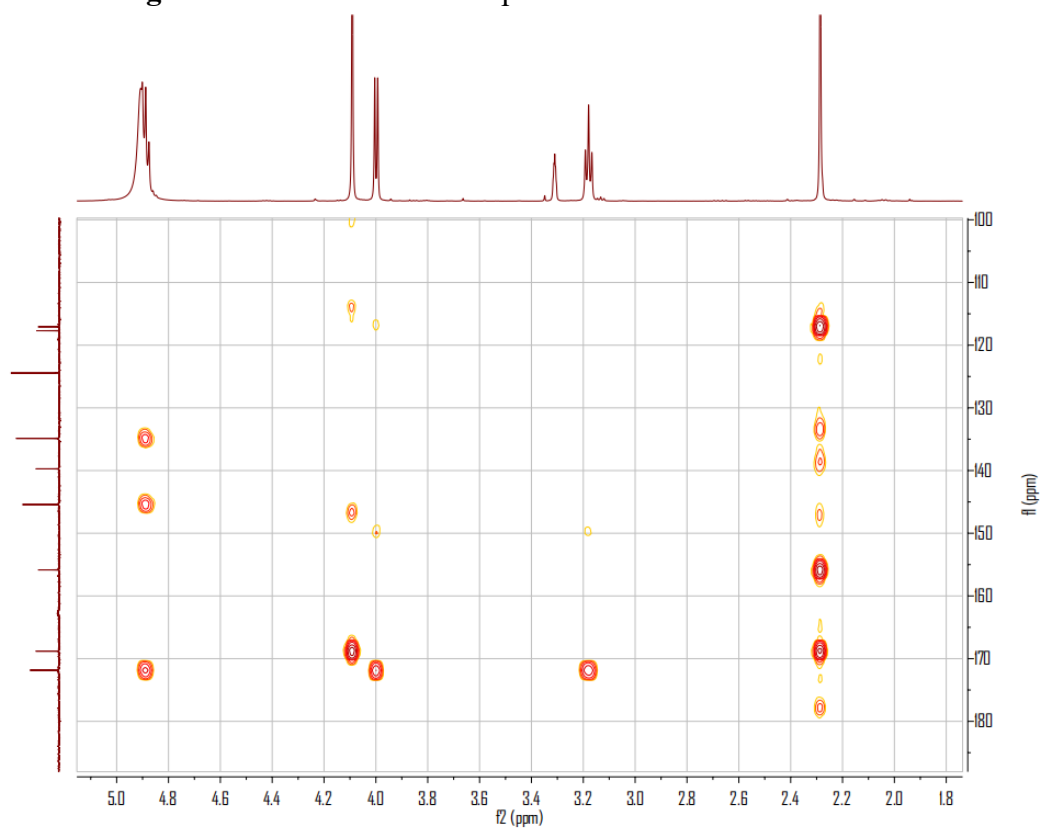

**Figure S119.** Partial HMBC spectrum of **14** in methanol-*d*<sub>4</sub>



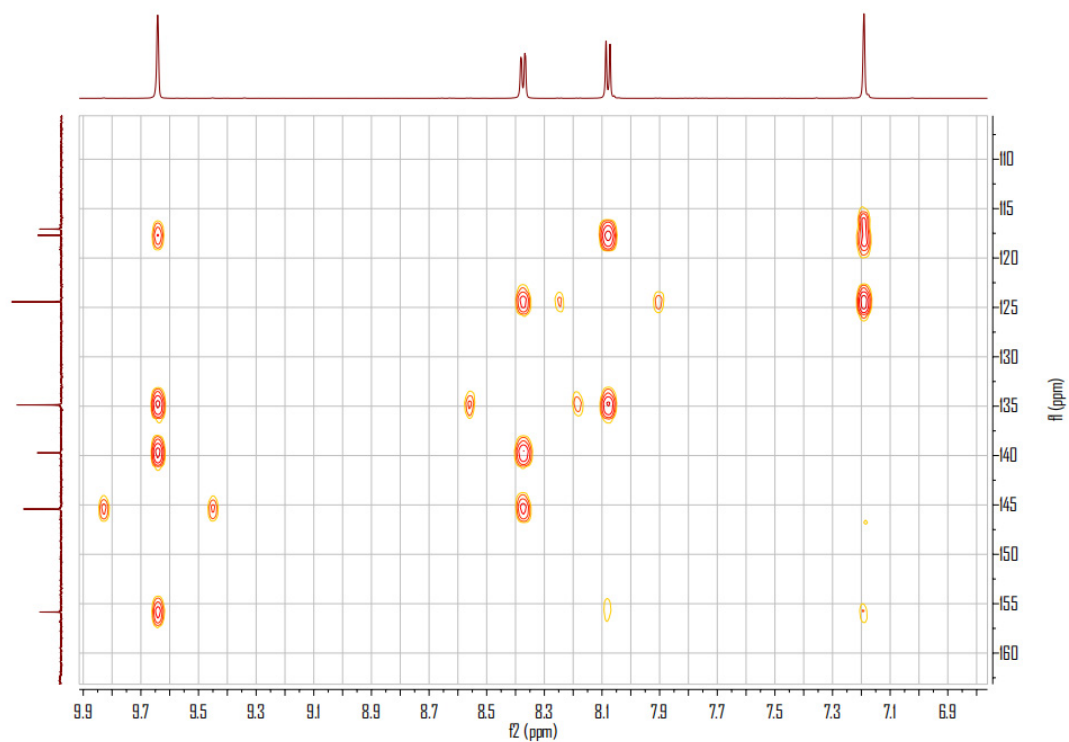

**Figure S120.** Partial HMBC spectrum of **14** in methanol-*d*<sub>4</sub>

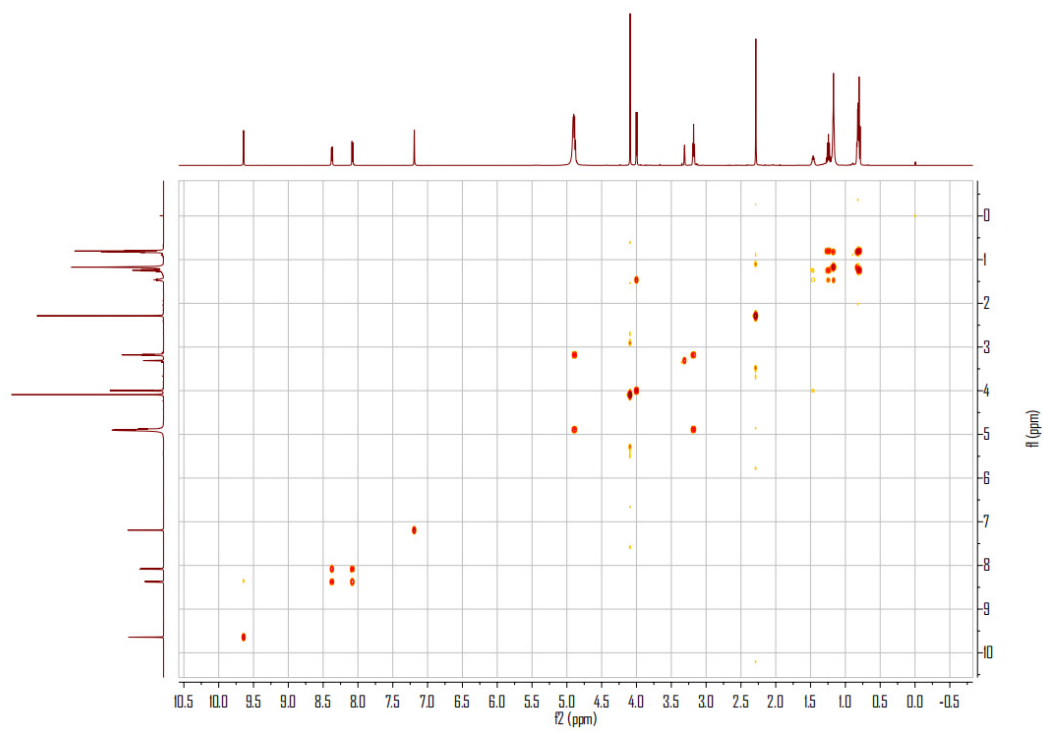

**Figure S121.** COSY spectrum of **14** in methanol-*d*<sub>4</sub>

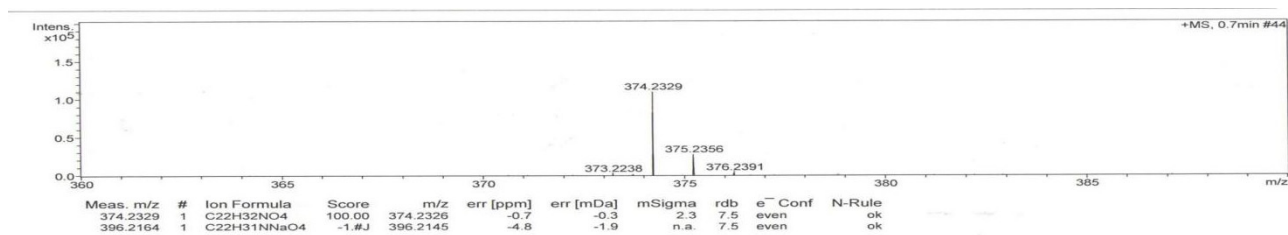

Figure S122. HRESIMS spectrum of 14

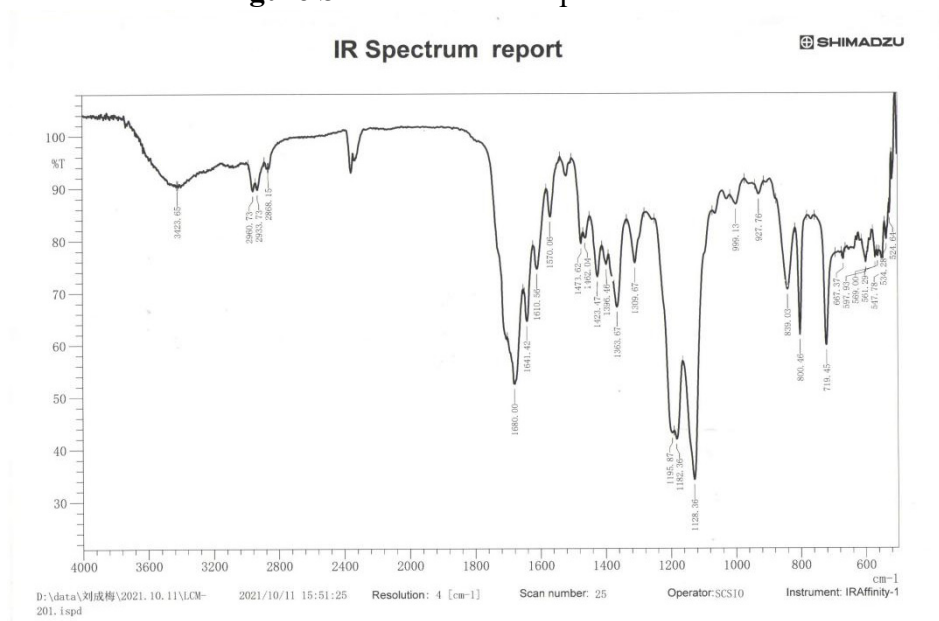

Figure S123. IR spectrum of 14

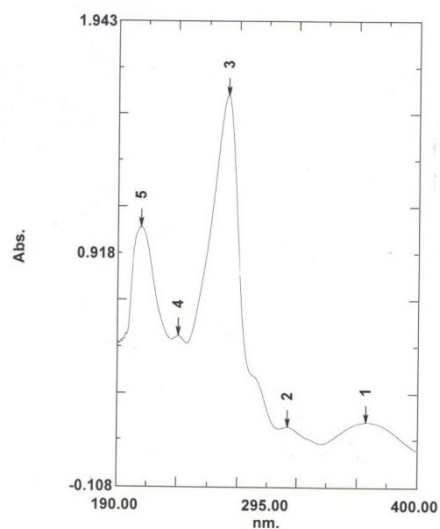

Figure S124. UV spectrum of 14

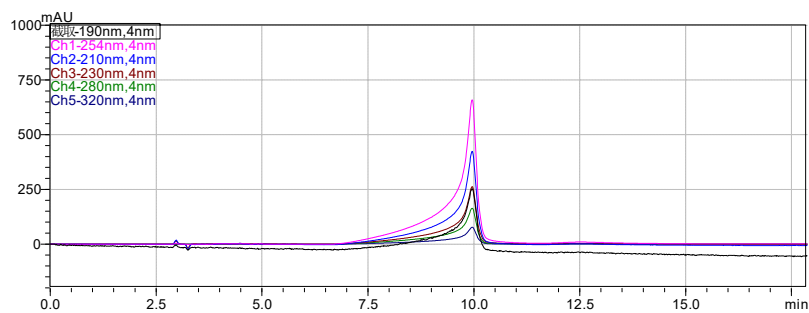

**Figure S125.** Chirality analysis of compound **14** by CHIRALPAK IA

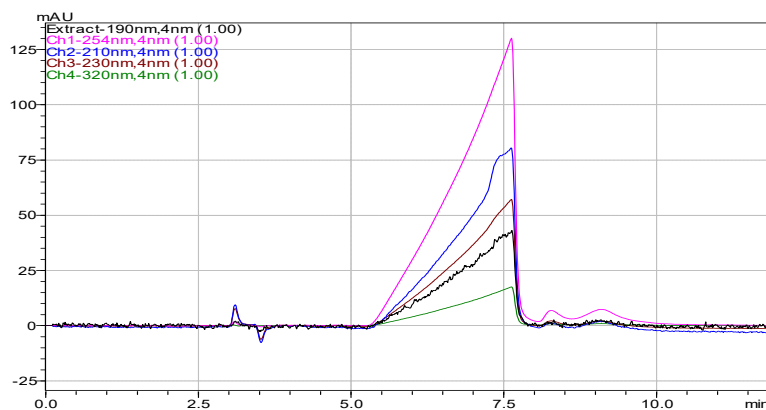

**Figure S126.** Chirality analysis of compound **14** by CHIRALPAK IB

**Table S1.** Stable conformers of compound (16*R*)-**9** used for ECD calculations

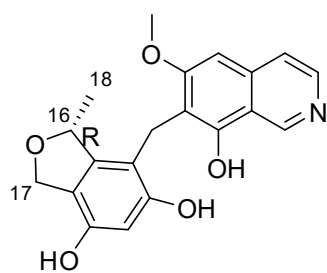

(16*R*)-**9**

| Conformer | Conformation |
|-----------|--------------|
| 9-1       |              |
| 9-2       |              |
| 9-3       |              |
| 9-4       |              |
| 9-5       |              |

|      |                                                                                      |
|------|--------------------------------------------------------------------------------------|
| 9-6  | 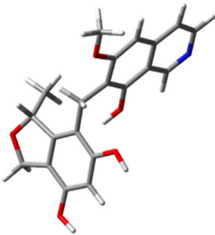    |
| 9-7  |    |
| 9-8  |     |
| 9-9  |   |
| 9-10 |  |
| 9-11 |  |

**Table S2.** Important thermodynamic parameters (a.u.) of (16*R*)-**9** at B3LYP/6-311G (d,p) level in the gas phase

| Conformer | <i>E</i> (kcal/mol ) | <i>H</i> (kcal/mol ) | <i>G</i> (kcal/mol ) | imaginary frequencies |
|-----------|----------------------|----------------------|----------------------|-----------------------|
| 9-1       | -755574.960          | -755574.367          | -755621.613          | 18.87                 |
| 9-2       | -755574.377          | -755573.784          | -755621.078          | 18.75                 |
| 9-3       | -755572.438          | -755571.846          | -755619.745          | 20.41                 |
| 9-4       | -755571.803          | -755571.211          | -755619.772          | 15.55                 |
| 9-5       | -755572.743          | -755572.150          | -755620.652          | 15.98                 |
| 9-6       | -755572.743          | -755572.150          | -755620.653          | 15.97                 |
| 9-7       | -755572.269          | -755571.677          | -755620.579          | 10.81                 |
| 9-8       | -755572.108          | -755571.516          | -755620.141          | 15.61                 |
| 9-9       | -755571.950          | -755571.357          | -755619.951          | 12.11                 |
| 9-10      | -755572.268          | -755571.675          | -755620.573          | 10.82                 |
| 9-11      | -755571.750          | -755571.157          | -755620.099          | 12.20                 |

*E*: total energy; *H*: enthalpy; *G*: Gibbs free energy.

**Table S3.** Relative thermal energies ( $\Delta E$ ), relative free energies ( $\Delta G$ ), and equilibrium populations (P) of low-energy conformers of structures (16R)-**9** in methanol.

| Conformer | $\Delta E(\text{kcal/mol})^a$ | $\Delta G(\text{kcal/mol})^a$ | $P_G\%^b$ |
|-----------|-------------------------------|-------------------------------|-----------|
| 9-1       | 0.000                         | 0.000                         | 40.71     |
| 9-2       | 0.583                         | 0.535                         | 16.50     |
| 9-3       | 2.522                         | 1.868                         | 1.74      |
| 9-4       | 3.157                         | 1.841                         | 1.82      |
| 9-5       | 2.217                         | 0.961                         | 8.03      |
| 9-6       | 2.217                         | 0.960                         | 8.05      |
| 9-7       | 2.691                         | 1.034                         | 7.11      |
| 9-8       | 2.852                         | 1.472                         | 3.39      |
| 9-9       | 3.010                         | 1.662                         | 2.46      |
| 9-10      | 2.692                         | 1.040                         | 7.03      |
| 9-11      | 3.210                         | 1.514                         | 3.16      |

<sup>a</sup> At the M062X/def2TZVP scrf(SMD) level of theory.

<sup>b</sup> From  $\Delta G$  values at 298.15 K.

**Table S4.** Crystal data and structure refinement for compound **6**

|                                             |                                                                |
|---------------------------------------------|----------------------------------------------------------------|
| Identification code                         | lcm-16                                                         |
| Empirical formula                           | C <sub>14</sub> H <sub>14.04</sub> NO <sub>4</sub>             |
| Formula weight                              | 260.30                                                         |
| Temperature/K                               | 100.00(10)                                                     |
| Crystal system                              | monoclinic                                                     |
| Space group                                 | P2 <sub>1</sub> /c                                             |
| a/Å                                         | 4.82780(10)                                                    |
| b/Å                                         | 13.4963(3)                                                     |
| c/Å                                         | 22.6665(7)                                                     |
| $\alpha$ /°                                 | 90                                                             |
| $\beta$ /°                                  | 96.025(3)                                                      |
| $\gamma$ /°                                 | 90                                                             |
| Volume/Å <sup>3</sup>                       | 1468.73(6)                                                     |
| Z                                           | 4                                                              |
| $\rho_{\text{calc}}/\text{cm}^3$            | 1.177                                                          |
| $\mu/\text{mm}^{-1}$                        | 0.724                                                          |
| F(000)                                      | 548.0                                                          |
| Crystal size/mm <sup>3</sup>                | 0.15 × 0.12 × 0.1                                              |
| Radiation                                   | Cu K $\alpha$ ( $\lambda$ = 1.54184)                           |
| 2 $\theta$ range for data collection/°      | 7.634 to 147.79                                                |
| Index ranges                                | -5 ≤ h ≤ 5, -16 ≤ k ≤ 9, -27 ≤ l ≤ 26                          |
| Reflections collected                       | 7185                                                           |
| Independent reflections                     | 2852 [ $R_{\text{int}}$ = 0.0197, $R_{\text{sigma}}$ = 0.0255] |
| Data/restraints/parameters                  | 2852/1/212                                                     |
| Goodness-of-fit on F <sup>2</sup>           | 1.073                                                          |
| Final R indexes [ $I \geq 2\sigma(I)$ ]     | $R_1$ = 0.0487, $wR_2$ = 0.1366                                |
| Final R indexes [all data]                  | $R_1$ = 0.0545, $wR_2$ = 0.1406                                |
| Largest diff. peak/hole / e Å <sup>-3</sup> | 0.48/-0.26                                                     |

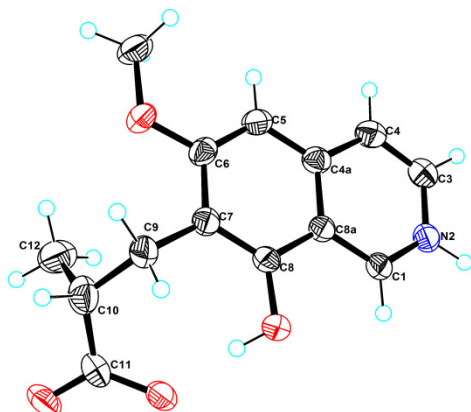



**Table S5.** Crystal data and structure refinement for compound **12**

|                                             |                                                               |
|---------------------------------------------|---------------------------------------------------------------|
| Identification code                         | LCM-28                                                        |
| Empirical formula                           | C <sub>18</sub> H <sub>17</sub> NO <sub>5</sub>               |
| Formula weight                              | 327.32                                                        |
| Temperature/K                               | 100.00(10)                                                    |
| Crystal system                              | triclinic                                                     |
| Space group                                 | P-1                                                           |
| a/Å                                         | 7.6037(4)                                                     |
| b/Å                                         | 9.9253(5)                                                     |
| c/Å                                         | 10.5261(6)                                                    |
| α/°                                         | 70.543(5)                                                     |
| β/°                                         | 85.628(4)                                                     |
| γ/°                                         | 81.605(4)                                                     |
| Volume/Å <sup>3</sup>                       | 740.68(7)                                                     |
| Z                                           | 2                                                             |
| ρ <sub>calc</sub> /cm <sup>3</sup>          | 1.468                                                         |
| μ/mm <sup>-1</sup>                          | 0.897                                                         |
| F(000)                                      | 344.0                                                         |
| Crystal size/mm <sup>3</sup>                | 0.13 × 0.12 × 0.1                                             |
| Radiation                                   | Cu Kα (λ = 1.54184)                                           |
| 2θ range for data collection/°              | 8.914 to 148.202                                              |
| Index ranges                                | -9 ≤ h ≤ 9, -7 ≤ k ≤ 12, -11 ≤ l ≤ 13                         |
| Reflections collected                       | 7019                                                          |
| Independent reflections                     | 2880 [R <sub>int</sub> = 0.0259, R <sub>sigma</sub> = 0.0317] |
| Data/restraints/parameters                  | 2880/0/220                                                    |
| Goodness-of-fit on F <sup>2</sup>           | 1.082                                                         |
| Final R indexes [I ≥ 2σ (I)]                | R <sub>1</sub> = 0.0419, wR <sub>2</sub> = 0.1114             |
| Final R indexes [all data]                  | R <sub>1</sub> = 0.0523, wR <sub>2</sub> = 0.1150             |
| Largest diff. peak/hole / e Å <sup>-3</sup> | 0.21/-0.27                                                    |

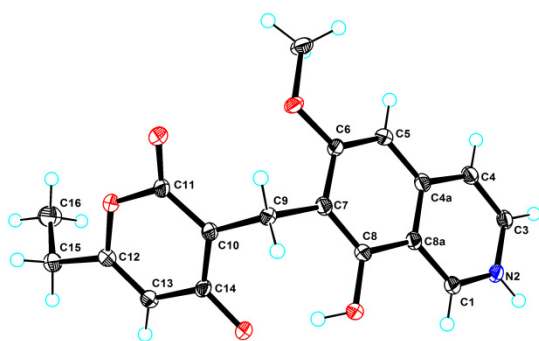

Supplement: s1 [file s1]
